# Supplementary material for: Effects of reproductive period duration and number of pregnancies on midlife ECG indices: a secondary analysis from the Women’s Health Initiative Clinical Trial
Source: PubMed Central journal article supplement — BMJ Open. 2018 Aug 17;8(8):e019129. doi: 10.1136/bmjopen-2017-019129 (PMC6104755; doi:10.1136/bmjopen-2017-019129), 2018-08-17
Supplement: bmjopen-2017-019129.draft_revisions.pdf [file bmjopen-2017-019129.draft_revisions.pdf]

# BMJ Open

BMJ Open is committed to open peer review. As part of this commitment we make the peer review history of every article we publish publicly available.

When an article is published we post the peer reviewers' comments and the authors' responses online. We also post the versions of the paper that were used during peer review. These are the versions that the peer review comments apply to.

The versions of the paper that follow are the versions that were submitted during the peer review process. They are not the versions of record or the final published versions. They should not be cited or distributed as the published version of this manuscript.

BMJ Open is an open access journal and the full, final, typeset and author-corrected version of record of the manuscript is available on our site with no access controls, subscription charges or pay-per-view fees (<http://bmjopen.bmj.com>).

If you have any questions on BMJ Open's open peer review process please email [info.bmjopen@bmj.com](mailto:info.bmjopen@bmj.com)

# BMJ Open

## Effects of Reproductive Period Duration and Number of Pregnancies on Mid-Life Electrocardiographic Indices: A Secondary Analysis from the Women's Health Initiative Clinical Trial

|                               |                                                                                                                                                                                                                                                                                                                                                                                                                                                                                                                                                                                |
|-------------------------------|--------------------------------------------------------------------------------------------------------------------------------------------------------------------------------------------------------------------------------------------------------------------------------------------------------------------------------------------------------------------------------------------------------------------------------------------------------------------------------------------------------------------------------------------------------------------------------|
| Journal:                      | <i>BMJ Open</i>                                                                                                                                                                                                                                                                                                                                                                                                                                                                                                                                                                |
| Manuscript ID                 | bmjopen-2017-019129                                                                                                                                                                                                                                                                                                                                                                                                                                                                                                                                                            |
| Article Type:                 | Research                                                                                                                                                                                                                                                                                                                                                                                                                                                                                                                                                                       |
| Date Submitted by the Author: | 06-Oct-2017                                                                                                                                                                                                                                                                                                                                                                                                                                                                                                                                                                    |
| Complete List of Authors:     | Parikh, Nisha; University of California San Francisco, Medicine<br>Kapphahn, Kristopher; Stanford University School of Medicine<br>Haley, Haley; Stanford University School of Medicine<br>Olgin, Jeffrey; University of California San Francisco, Medicine<br>Allison, Matthew; UCSD,<br>Magnani, Jared; University of Pittsburgh, Medicine<br>Ryckman, KK; University of Iowa, Epidemiology<br>Waring, Molly; University of Massachusetts Medical School<br>Perez, Marco; Stanford University, Cardiovascular Medicine<br>Howard, Barbara; MedStar Health Research Institute |
| Keywords:                     | women, Adult cardiology < CARDIOLOGY, menopause, ECG, pregnancy                                                                                                                                                                                                                                                                                                                                                                                                                                                                                                                |
|                               |                                                                                                                                                                                                                                                                                                                                                                                                                                                                                                                                                                                |

SCHOLARONE™  
Manuscripts

View Only

1  
2  
3 1  
4 2 **Effects of Reproductive Period Duration and Number of**  
5 3 **Pregnancies on Mid-Life Electrocardiographic Indices: A**  
6 4 **Secondary Analysis from the Women's Health Initiative Clinical**  
7 5 **Trial**  
8  
9  
10  
11 6  
12 7  
13 8  
14 9

15  
16 10 **Authors:** Nisha I. Parikh MD MPH (1), Kristopher Kapphahn PhD (2), Haley Hedlin PhD (2),  
17 11 Jeffrey E. Olgin MD (1), Matthew A. Allison MD (3), Jared W. Magnani MD (4), MSc, Kelli R.  
18 12 Ryckman PhD (5), Molly E. Waring PhD (6), Marco V. Perez MD (7), Barbara V. Howard PhD  
19 13 (8)  
20 14

- 21 15 1) Division of Cardiology, University of California San Francisco, San Francisco, CA  
22 16 2) Quantitative Sciences Unit, Department of Medicine, Stanford University School of  
23 17 Medicine.  
24 18 3) Department of Family Medicine, La Jolla USCD  
25 19 4) Division of Cardiology, Boston University School of Medicine, Boston, MA  
26 20 5) Department of Epidemiology, College of Public Health, University of Iowa, IO  
27 21 6) Division of Epidemiology of Chronic Diseases and Vulnerable Populations,  
28 22 Department of Quantitative Health Sciences, University of Massachusetts Medical  
29 23 School, Worcester, MA  
30 24 7) Department of Medicine, Stanford University School of Medicine, Stanford, CA  
31 25 8) MedStar Health Research Institute, Hyattsville, MD and Georgetown and Howard  
32 26 Universities Center for Clinical and Translational Science  
33  
34  
35  
36  
37  
38

39 30 *Corresponding author: Nisha I. Parikh, MD MPH*  
40 31 *E-mail: parikh.nisha@gmail.com*  
41 32

42 33 Running Title: Reproductive factors and electrocardiographic intervals  
43 34

44 35 Key Words: endogenous estrogen, sex hormones, pregnancy, menarche, menopause,  
45 36 reproductive history, menarche, age at birth, repolarization, QTc, PR interval, electrocardiogram  
46 37

47 38 Word Count: 4196  
48 39

49 40 Funding: This work was supported by AHA grant 13CRP17350002 (NIP), NIH grants  
50 41 7R21HL115398 (NIP), KL2TR000160 (MEW) and U01HL105268 (MEW), NHLBI/NIH &  
51 42 DHHS through contracts, HHSN268201100046C, HHSN268201100001C,  
52 43 HHSN268201100002C, HHSN268201100003C, HHSN268201100004C  
53 44  
54  
55  
56  
57  
58  
59  
60

1  
2  
3 45  
4 46 *Conflict of Interest: None of the authors have any conflicts of interest in respect to this article*  
5 47  
6  
7  
8  
9  
10  
11  
12  
13  
14  
15  
16  
17  
18  
19  
20  
21  
22  
23  
24  
25  
26  
27  
28  
29  
30  
31  
32  
33  
34  
35  
36  
37  
38  
39  
40  
41  
42  
43  
44  
45  
46  
47  
48  
49  
50  
51  
52  
53  
54  
55  
56  
57  
58  
59  
60

For peer review only

1  
2  
3 **48 Abstract: (word count=259)**  
4

5 **49 Objective:** The effects of the hormonal milieu of pregnancy, menses and menopause on cardiac  
6  
7  
8 **50** electrical conduction are uncertain. Therefore, we studied the association between number of  
9  
10 **51** pregnancies and reproductive period duration (RD, time from menarche to menopause) with  
11  
12 **52** electrocardiographic intervals in the Women's Health Initiative Clinical Trial.  
13

14 **53 Methods:** We employed multivariable linear regression models relating number of pregnancies  
15  
16 **54** and RD with millisecond (ms) changes in PR interval, P wave indices (duration and dispersion)  
17  
18 **55** and QTc from enrollment electrocardiogram.  
19  
20

21 **56 Results:** Among 40,687 women (mean age=62 years), 5+ live births versus 0 prior pregnancies  
22  
23 **57** was associated with a 1.32 ms increase in PR interval [95% CI (0.25, 2.38)], with a graded  
24  
25 **58** association with longer QTc interval (ms) [none= 0.66 (-0.56, 1.88), 1= 0.15 (-0.71, 1.02), 2 to  
26  
27 **59** 4= 0.25 (-0.43, 0.94), and 5+ live births=1.15 (0.33, 1.98), p = 0.008]. RD was associated with  
28  
29 **60** longer PR interval and maximum P wave duration (but not P-wave dispersion) among never  
30  
31 **61** users of HT: [PR (ms) per additional RD year: 0.10 (0.04, 0.16); higher P-wave duration (ms):  
32  
33 **62** 0.09 (0.06, 0.12)]. For every year increase in reproductive period, QTc decreased by 0.04 ms (-  
34  
35 **63** 0.07, -0.01).  
36  
37  
38  
39

40 **64 Limitations:** Potential misclassification of exposure due to participant recall  
41

42 **65 Conclusions:** An increasing number of live births are related to increased ventricular  
43  
44 **66** repolarization time whereas RD is related to decreased ventricular repolarization time. Both  
45  
46 **67** longer RD and grandmultiparity are related to increased atrial conduction time. The  
47  
48 **68** premenopausal hormonal milieu appears to have effects on midlife cardiac electrical conduction  
49  
50 **69** system remodeling in women that may modestly influence CVD risk in later life.  
51  
52  
53

54 **70**

55  
56 **71 Article Summary:**  
57

1  
2  
3 72 *Strengths and Limitations of the Study.*  
4

- 5 73 • *A strength is the use of a well characterized multiethnic, large dataset of postmenopausal*  
6  
7  
8 74 *women representative of women in the United States.*
- 9  
10 75 • *A notable limitation is that the exposure variables were acquired retrospectively.*  
11  
12 76 • *We were unable to adjust for pregnancy complications such as preeclampsia or*  
13  
14 77 *gestational diabetes.*  
15  
16

17 78  
18  
19 79 *What is already known about this subject?*  
20

21 80 Clinical studies with a relatively limited number of participants suggest that there are small but  
22  
23 81 measureable changes in electrocardiographic intervals during pregnancy.  
24  
25

26 82  
27  
28 83 *What does this study add?*  
29

30  
31 84 We demonstrate for the first time in a large cohort of women with systematic research  
32  
33 85 electrocardiograms that number of livebirths and a longer reproductive period duration (i.e.  
34  
35 86 longer exposure to menstrual cycling) exerts dynamic and measureable effects on ventricular  
36  
37 87 repolarization and atrial conduction.  
38  
39

40 88  
41  
42 89 *How might this impact on clinical practice?*  
43

44  
45 90 Published normal reference values for electrocardiograms throughout pregnancy and the post-  
46  
47 91 partum period are lacking even though it is widely accepted that pregnancy has material effects  
48  
49 92 on cardiac electrical conduction resulting to increased risks of arrhythmia.(1) There is a dearth  
50  
51 93 of systematic studies assessing p wave parameter changes throughout the menstrual cycle. Such  
52  
53  
54  
55  
56  
57  
58  
59  
60

1  
2  
3 94 studies would be important in furthering our dual understanding of cardiac adaptations of  
4  
5 95 pregnancy and in our understanding of pregnancy-related arrhythmia.  
6  
7

8 96

9  
10 97 **Key Words:** *endogenous estrogen, sex hormones, pregnancy, menarche, menopause,*  
11  
12 98 *reproductive history, menarche, age at birth, repolarization, QTc, PR interval,*  
13  
14 99 *electrocardiogram*  
15

16  
17 100

18  
19 101

20  
21 102 **INTRODUCTION:**

22  
23 103 *Electrocardiogram parameters reflect current as well as future CVD risk*

24  
25 104 Electrocardiographic parameters are reflections of both current as well as future cardiovascular  
26  
27 105 disease risk. For example, in the Framingham Heart Study, a prolonged PR interval (> 200 ms)  
28  
29 106 was related to incident atrial fibrillation, all-cause mortality and to the likelihood of needing a  
30  
31 107 permanent pacemaker.(2) In addition to PR interval, the p wave duration more directly relates to  
32  
33 108 atrial size and is an antecedent of atrial fibrillation.(3) Both PR interval and p wave duration are  
34  
35 109 markers of left atrial size which in turn is a correlate of hypertensive heart disease(4) and  
36  
37 110 incident stroke.(5) It is unclear to what extent PR interval is affected by premenopausal  
38  
39 111 hormonal fluctuations from the menstrual cycle and childbearing.  
40  
41  
42  
43

44 112

45  
46 113 *Pregnancy, cardiac remodeling and the electrocardiogram*

47  
48 114 Pregnancy and the post-partum period both have substantial physiologic effects on cardiac  
49  
50 115 electrophysiology. Physiologic studies of women during early and late pregnancy as well as early  
51  
52 116 post-partum suggest a shortening of the corrected QT interval (QTc) which partially reverts back  
53  
54 117 to pre-pregnancy values following post-partum.(6, 7) Direct pathophysiologic links connecting  
55  
56  
57

1  
2  
3 118 myocardial structural remodeling and cardiac electrical remodeling have been increasingly  
4  
5 119 recognized.(8) With regards to myocardial remodeling, pregnancy induced cardiac remodeling  
6  
7  
8 120 does not completely revert back to pre-pregnancy levels and effects of increasing parity on  
9  
10 121 cardiac remodeling can be detected even in mid-life.(9) However, the extent to which an  
11  
12 122 increasing number of pregnancies exerts long lasting effects on the cardiac electrical conduction  
13  
14  
15 123 system is uncertain.(9)

### 16 17 124 18 19 125 *Estrogen exposure and the electrocardiogram*

20  
21 126 In addition to the more marked hormonal fluctuations seen during pregnancy, there are also more  
22  
23 127 subtle, cyclic changes in estrogen and progesterone cycling that occur during menstrual cycling  
24  
25  
26 128 in women of reproductive age. Testosterone and progesterone are recognized to decrease the  
27  
28 129 QTc interval.(10) Data from the Women's Health Initiative Hormone Trial (or WHI HT)  
29  
30 130 suggests that estrogen-only therapy modestly prolongs QTc beyond that of both estrogen-  
31  
32 131 progestin therapy and placebo.(11) However, it is uncertain whether the pre-menopausal  
33  
34 132 hormonal milieu (reflected by the length of the interval from menarche to menopause and  
35  
36 133 number of pregnancies) is associated with changes in QTc in the WHI HT.  
37  
38  
39

40 134  
41  
42 135 WHI HT represents a unique resource to study questions related to pregnancy and  
43  
44 136 reproductive history and ECG parameters and thus we sought to determine if there is a positive  
45  
46  
47 137 or negative association between number of pregnancies and reproductive period duration with  
48  
49 138 mid-life electrocardiogram intervals (PR interval and QTc) and p wave parameters (p wave  
50  
51 139 maximum duration, dispersion and index).  
52

53  
54 140  
55  
56  
57  
58  
59  
60



1  
2  
3 **141 METHODS AND ANALYSIS PLAN:**  
4

5 **142** Our current study design is a secondary analysis of a previously conducted randomized  
6  
7 **143** controlled trial.  
8

9  
10  
11 **144** *Study sample.*  
12  
13

14 **145** The WHI recruitment began in 1991 and consisted of a set of clinical trials on HT,  
15  
16 **146** dietary modification and calcium/ vitamin D supplementation on cardiovascular disease, cancer  
17  
18 **147** and fractures and an observational study.(12) The clinicaltrial.gov identifier for the WHI is  
19  
20 **148** NCT00000611. This analysis drew from the cohort of women enrolled in the clinical trial.  
21  
22 **149** **Figure 1** shows the creation of the study sample. Of 68,132 women in WHI Studies (hormone  
23  
24 **150** therapy, diet and calcium/vitamin D and observational studies), we excluded 5,217 who were  
25  
26 **151** missing ECGs and 15,543 who had prevalent CVD. Of these, 47,372 women, 6,685 were further  
27  
28 **152** excluded for having missing covariate data, leaving a final sample of 40,687.  
29  
30  
31  
32

33  
34 **153** *Ascertainment of Reproductive Exposures.*  
35

36 **154** Information on reproductive factors was collected via questionnaire at the second screening visit  
37  
38 **155** in the WHI (between 1993-1998). Participants were asked how many times they had been  
39  
40 **156** pregnant (were given choices ranging from 0 to 9+), number of live births and how old they were  
41  
42 **157** at the end of the first and at the end of their last pregnancy (<20, 20-24, 25-29,30-34,35+ years).  
43  
44 **158** Age at menarche (<9, 10,11,12,13,14,15,>16 years) and age at menopause was asked on this  
45  
46 **159** screening questionnaire. Reproductive period duration (RD) was defined as the duration between  
47  
48 **160** age at menarche to age at menopause (in years). Detailed current and prior hormone therapy  
49  
50 **161** usage and hysterectomy/oophorectomy status was collected at enrollment and has been  
51  
52 **162** previously described.(13)  
53  
54  
55  
56  
57  
58  
59  
60

1  
2  
3 163 *Ascertainment of Covariates:*  
4  
5

6 164 Age, income, education, self-reported race/ethnicity, geographic region of United States, history  
7  
8  
9 165 and duration of breastfeeding were collected at participant enrollment and second screening  
10  
11 166 examinations. Body mass index (BMI, kg/m<sup>2</sup>) was calculated using height and weight measured  
12  
13 167 by study staff at baseline. Women with hypertension were identified as those with a self-reported  
14  
15 168 history of treated hypertension or blood pressure measurements meeting JNC 7 criteria for  
16  
17 169 hypertension.(14) Diabetes was identified by self-reported use of anti-diabetic medications and  
18  
19 170 hyperlipidemia by use of cholesterol lowering medications. Antianxiety and antidepressant  
20  
21 171 medication use was validated on enrollment by nurse examination of medication bottles.  
22  
23  
24  
25

26 172 *Electrocardiographic parameters:*  
27  
28

29 173 Standard 12-lead ECGs were recorded in all women by strictly standardized procedures in all  
30  
31 174 clinical centers as has been described.(15) All ECGs were processed in a central laboratory  
32  
33 175 (EPICARE Center, University of Alberta, Edmonton, Canada, and later Wake Forest University,  
34  
35 176 Winston-Salem, NC), where they were visually inspected for technical errors and inadequate  
36  
37 177 quality. ECGs were processed with the 2001 version of the Marquette 12-SL program (GE  
38  
39 178 Marquette). In addition to PR and QT intervals, we also examined the maximum P wave  
40  
41 179 duration (from all 12 leads of the ECG).(3) The QT interval was corrected using Bazett's  
42  
43 180 formula. The Institutional Review Board of University of California San Francisco approved this  
44  
45 181 study protocol.  
46  
47  
48  
49

50  
51 182 *Statistical Methods:*  
52

53  
54 183 Primary Analysis  
55  
56  
57

1  
2  
3 184 We employed multivariable linear regression to assess the association between reproductive  
4  
5 185 exposures ( number of pregnancies and RD) with the dependent variable of ECG parameters  
6  
7 186 (PR interval in milliseconds, QTc in milliseconds). Four primary models were fit: PR regressed  
8  
9 187 on number of live births, QTc regressed on number of live births, PR regressed on RD, and QTc  
10  
11 188 regressed on RD. Multivariable models were adjusted for a priori covariates: age, BMI,  
12  
13 189 hypertension status, diabetes, income, education, race/ethnicity, region, history of breastfeeding,  
14  
15 190 antianxiety medication, antidepressant medication, lipid medication, duration of breastfeeding,  
16  
17 191 oophorectomy status, hormone therapy use, heart rate and QRS duration. In analyses considering  
18  
19 192 categories of livebirths we employed a linear trend test.  
20  
21  
22  
23 193 We explored effect modification of the primary exposures, number of live births and RD, by  
24  
25 194 hormone therapy usage and hysterectomy status. We classified hormone therapy usage into three  
26  
27 195 categories: women who reported current, prior or no hormone therapy usage. A statistical  
28  
29 196 interaction term between hormone therapy usage and the exposure (RD or number of live births)  
30  
31 197 was used to consider effect modification by reported hormone therapy use. When the statistical  
32  
33 198 interaction term was statistically significant ( $p < 0.05$ ) according to a likelihood ratio test, we  
34  
35 199 presented the estimates in each of the three categories of hormone therapy use and we presented  
36  
37 200 a single estimate if there was no evidence for effect modification by hormone therapy. A similar  
38  
39 201 approach was employed for studying RD or number of live births and hysterectomy status. To  
40  
41 202 show sensitivity of estimates to confounders, unadjusted associations were reported as well as  
42  
43 203 those associations adjusted for the confounders listed above.  
44  
45  
46  
47  
48  
49  
50

51 204  
52 205 *Secondary Analyses:*  
53  
54  
55  
56  
57  
58  
59  
60

1  
2  
3 206 In secondary analyses, we studied our exposures in relation to secondary outcomes, P wave  
4  
5 207 duration and p wave dispersion. In an additional secondary set of analyses, we removed subjects  
6  
7 208 who reported never being pregnant and used multivariable linear regression to model  
8  
9 209 associations between age at first live birth and the five electrocardiographic measures. These  
10  
11 210 models used the same covariates to adjust association as those in our primary analyses. Further,  
12  
13 211 Subjects who had implausible secondary outcome values (i.e. all zero values or all constant  
14  
15 212 values across all electrocardiographic measures) were removed.  
16  
17  
18  
19 213

### 21 214 *Multiple Imputation Analyses*

22  
23 215 We used multiple imputation techniques to impute missing covariates and refit models from  
24  
25 216 primary analyses to explore the sensitivity of our results to missing data. We used the PROC MI  
26  
27 217 in SAS to construct 5 multiply imputed data sets. Missing variables were imputed via fully  
28  
29 218 conditional specification method in PROC MI using all variables from the analytic model. We fit  
30  
31 219 models to each imputed data set and pooled the results. The pooled results from imputation did  
32  
33 220 not differ appreciably from the results of the complete case analysis.  
34  
35  
36

37 221 All analyses were performed in SAS 9.4 (SAS Institute, Cary NC, USA).  
38  
39  
40 222

## 41 42 223 **RESULTS**

43  
44 224 **Table 1** shows the baseline characteristics of our sample by number of pregnancies lasting at  
45  
46 225 least 6 months. The mean age at enrollment was 62.4 years, while the mean age at menarche was  
47  
48 226 12.6 and mean age at menopause was 50.0 years. 82.5% of women were White, 9.3% Black, 4%  
49  
50 227 Hispanic and 2.7% Asian. Forty five percent of the study sample reported never having used  
51  
52 228 hormone therapy prior to enrollment.  
53  
54  
55  
56  
57  
58  
59  
60

1  
2  
3 229  
4  
5 230 *PR interval*  
6  
7  
8 231 Compared to women reporting never having been pregnant, having 5 or more pregnancies was  
9  
10 232 associated with a 1.3 ms longer PR interval (**Table 2**). Among women who reported never  
11  
12 233 having used hormones, each additional year of reported reproductive period duration was  
13  
14 234 associated with a 0.1 ms longer PR interval (or atrial conduction velocity). Conversely, there  
15  
16  
17 235 was no significant association between RD and PR interval among women who reported prior or  
18  
19 236 current hormone therapy use (p value for interaction < 0.01) (**Table 2**). Age at first live birth,  
20  
21 237 was not related to PR interval (data not shown).

23  
24 238 *QTc*

25  
26 239 Compared to never having been pregnant, having 5 or more pregnancies was related to a 1.2 ms  
27  
28 240 longer QTc (**Table 3**). However, not carrying a pregnancy to term, or having 1 or 2-4 term  
29  
30 241 pregnancies (versus not being pregnant), were not related to QTc. For each additional year in  
31  
32 242 reproductive period duration, there was a 0.4 ms shorter QTc (**Table 3**). Restricting to women  
33  
34 243 who had at least one live birth did not change our results (data not shown).

35  
36  
37 244 *P wave duration and dispersion*

38  
39  
40 245 P wave dispersion was higher for women with 2-4 live births (ms increase =0.62, 95% CI: 0.01,  
41  
42 246 1.24) and 5 live births (0.94, 95% CI: 0.20, 1.67), compared with those who reported never  
43  
44 247 having been pregnant (**Table 4**). Reproductive period duration was related to maximum p wave  
45  
46 248 duration among women who reported never having used hormones (0.09, 95% CI: 0.06, 0.13)  
47  
48 249 but not among those who reported prior or current hormone therapy use (p interaction < 0.01)  
49  
50 250 (**Table 5**).

51  
52  
53  
54 251

1  
2  
3 **252 DISCUSSION**  
4

5 **253** *Summary of Findings*  
6

7 **254** We found that having five or more pregnancies compared to none was associated with a small  
8  
9 **255** increase in mid-life atrial conduction time, independent of factors known to be associated with  
10  
11 **256** this interval (PR). Number of live births among women with at least one live birth (compared to  
12  
13 **257** no prior pregnancies) was associated with increased atrial conduction time. Having 5 or more  
14  
15 **258** pregnancies was related to a small increase in ventricular repolarization time as compared to  
16  
17 **259** having no prior pregnancies. Among women reporting no prior exogenous hormone use, each  
18  
19 **260** additional year of reported RD was related to a very modest (0.1 ms) longer atrial conduction  
20  
21 **261** time. RD was related to a very modest increase in p wave duration. RD was related to a shorter  
22  
23 **262** ventricular repolarization time.  
24  
25  
26  
27  
28  
29

30 **263**

31 **264** *Mechanisms linking pregnancy and atrial electrical remodeling*  
32

33 **265** The effect of cumulative pregnancies on mid-life electrocardiograms would likely result from  
34  
35 **266** both 1) the pregnancy itself and 2) incident cardiometabolic factors that are impacted by  
36  
37 **267** pregnancy such as adiposity(16) and vascular stiffness,(17) and premenopausal blood  
38  
39 **268** pressure.(18) Adiposity and blood pressure are related to increased P wave indices in a normal  
40  
41 **269** healthy population,(19) and these P wave indices are electrocardiographic reflections of  
42  
43 **270** increased left atrial pressure, size and potentially fibrosis. The period of pregnancy and the  
44  
45 **271** peripartum are characterized by hormonal changes that affect both cardiovascular hemodynamics  
46  
47 **272** and adaptive myocardial remodeling. Pregnancy causes increased cardiac output, increased left  
48  
49 **273** ventricular mass, and decreased systemic vascular resistance.(20) The uterus and placenta in  
50  
51 **274** support of the growing fetus and fetal circulatory system represent a significant vascular shunt  
52  
53  
54  
55  
56  
57  
58  
59  
60

1  
2  
3 275 which contributes to these hemodynamic adaptations in pregnancy. The sum of these changes  
4  
5 276 result in both left atrial and left ventricular dilation. However, the effects of normal pregnancy on  
6  
7 277 electrographic remodeling during pregnancy are not well described. A prior small clinical study  
8  
9  
10 278 has looked at P wave duration and P wave dispersion among pregnant women compared with  
11  
12 279 controls and found that both of these parameters are increased.(21)  
13

14 280

15  
16  
17 281 *Pregnancy and cumulative effects on ventricular repolarization*

18  
19 282 A prior study in 37 women in late pregnancy compared with 18 age matched controls  
20  
21 283 demonstrated that QTc substantially prolongs late in pregnancy and that this only partially  
22  
23 284 corrects back to pre-pregnancy values post-partum.(7) Our finding that having 5 or more  
24  
25 285 pregnancies as compared to no prior pregnancies suggests that QTc prolongation during  
26  
27 286 pregnancy may accumulate across successive pregnancies and will be significantly increased on  
28  
29 287 mid-life ECG. Furthermore, we found evidence for a dose response relationship between number  
30  
31 288 of pregnancies and mid-life QTc.  
32

33 289

34  
35  
36  
37 290 *Reproductive period duration and atrial conduction velocity.*

38  
39 291 The menstrual cycle consists of a relatively well described hormone cycling in women consisting  
40  
41 292 of both estrogen and progesterone as well as testosterone production. A longer reproductive  
42  
43 293 period duration reflects the cumulative exposure that a woman has to these endogenous  
44  
45 294 fluctuations in sex hormone levels. Indeed, prior studies have assessed P wave parameters  
46  
47 295 throughout the menstrual cycle and noted that P wave duration is substantially increased in the  
48  
49 296 luteal phase.(22) Among women who did report taking prior hormone therapy, we observed a  
50  
51 297 very modest but significant increase in mid-life PR interval and in P wave duration. Exogenous  
52  
53  
54  
55  
56  
57  
58  
59  
60

1  
2  
3 298 hormone therapy use may obscure the relationship between endogenous hormone exposure from  
4  
5 299 a longer reproductive period duration and P wave parameters, which would explain our findings  
6  
7  
8 300 of effect modification by hormone therapy use. An earlier age at menarche (which would be  
9  
10 301 related to increased reproductive period duration) has been associated with increased  
11  
12 302 adiposity(23) and diabetes,(24) which in turn have been linked with increased p wave  
13  
14 303 duration(3) and, in the case of body mass index, with increased left atrial remodeling(25) and  
15  
16 304 thus may also partially underlie our findings.  
17  
18

19 305

20  
21 306 *Reproductive duration and decrease ventricular repolarization time*

22  
23  
24 307 The QTc is shortened by the action of progesterone and lengthened by estrogen during normal  
25  
26 308 menstrual cycling. The net effect of these changes during a single menstrual cycle can result in  
27  
28 309 shortening of ventricular repolarization time or QTc.(26) Our finding that an increased  
29  
30 310 reproductive duration was modestly inversely related to QTc in WHI, suggests that an increasing  
31  
32 311 exposure to progesterone, in particular during menstrual cycling, may have cumulative and  
33  
34 312 measurable effects on the mid-life electrocardiogram in women.  
35  
36

37 313

38  
39  
40 314 *Strength and Limitations*

41  
42 315 The use of a well characterized multiethnic, large dataset of postmenopausal women  
43  
44 316 representative of women in the United States is a strength of our study. A notable limitation is  
45  
46 317 that the exposure variables were acquired retrospectively and some are very distant events (eg  
47  
48 318 age at menarche occurred 40-70 years in the past). We were unable to adjust for pregnancy  
49  
50 319 complications such as preeclampsia or gestational diabetes since these were not collected. We  
51  
52 320 did not adjust for smoking, physical activity, and habitual consumption of alcohol and coffee  
53  
54  
55  
56  
57  
58  
59



1  
2  
3 321 which may have been related to the exposure variables but are not widely known to be related to  
4  
5 322 the ECG dependent variables studied.  
6

7  
8 323

9  
10 324 *Conclusions*

11  
12 325 We found that having an increasing number of pregnancies is related to significant changes in  
13  
14 326 atrial conduction time and ventricular repolarization time. A longer reproductive period duration  
15  
16 327 in women not exposed to exogenous hormone therapy is related to a modest increase in atrial  
17  
18 328 conduction time and to a modest decrease in ventricular repolarization. Reproductive health  
19  
20 329 factors reflective of endogenous sex hormone exposure may be significant determinants of  
21  
22 330 cardiac electrical remodeling in mid-life.  
23  
24

25  
26 331

27  
28 332 *Disclosures*

29  
30 333 None  
31  
32

33 334

34  
35 335 *Author contributorship statement:*

36  
37 336 Nisha I. Parikh conceived of the idea, designed the study, interpreted the analysis, drafted and  
38 337 critically reviewed the manuscript. She provided final approval of the manuscript

39  
40 338 Kristopher Kapphahn and Haley Hedlin conducted study design, statistical analysis and critical  
41 339 review of the manuscript. They provided final approval of the manuscript

42  
43 340 Jeffrey E. Olgin, Matthew A. Allison, Jared W. Magnani, MSc, Kelli R. Ryckman, Molly E.  
44 341 Waring, Marco V. Perez assisted with study design, analysis interpretation, drafting and critical  
45 342 reviewed the manuscript. They provided final approval of the manuscript

46  
47 343 Barbara V. Howard assisted with study design, interpreted the analysis, drafted and critically  
48 344 reviewed the manuscript. They provided final approval of the manuscript

49  
50 345 *Data sharing statement:*  
51  
52  
53  
54  
55  
56  
57  
58  
59  
60

1  
2  
3 346 This was a secondary analysis of preexisting data and as such, no new data was generated by this  
4 347 study. Information about data sharing for the Women's Health Initiative can be found at the  
5 348 following website: <https://www.whi.org/researchers/data/Pages/Home.aspx>  
6  
7

8 349

9  
10 350 **References**

- 11  
12 351 1. McAnulty JH. Arrhythmias in pregnancy. *Cardiology clinics*. 2012 Aug;30(3):425-34.  
13 352 PubMed PMID: 22813367. Epub 2012/07/21. eng.
- 14 353 2. Cheng S, Keyes MJ, Larson MG, McCabe EL, Newton-Cheh C, Levy D, et al. Long-term  
15 354 outcomes in individuals with prolonged PR interval or first-degree atrioventricular block. *JAMA*  
16 355 : the journal of the American Medical Association. 2009;301(24):2571-7.  
17 356 3. Magnani JW, Williamson MA, Ellinor PT, Monahan KM, Benjamin EJ. P wave indices:  
18 357 current status and future directions in epidemiology, clinical, and research applications.  
19 358 *Circulation Arrhythmia and electrophysiology*. 2009 Feb;2(1):72-9. PubMed PMID: 19808445.  
20 359 Pubmed Central PMCID: PMC2760837. Epub 2009/10/08. eng.
- 21 360 4. Cuspidi C, Rescaldani M, Sala C. Prevalence of echocardiographic left-atrial enlargement  
22 361 in hypertension: a systematic review of recent clinical studies. *American journal of hypertension*.  
23 362 2013 Apr;26(4):456-64. PubMed PMID: 23388831. Epub 2013/02/08. eng.
- 24 363 5. Yaghi S, Moon YP, Mora-McLaughlin C, Willey JZ, Cheung K, Di Tullio MR, et al. Left  
25 364 atrial enlargement and stroke recurrence: the northern Manhattan stroke study. *Stroke; a journal*  
26 365 *of cerebral circulation*. 2015 Jun;46(6):1488-93. PubMed PMID: 25908460. Pubmed Central  
27 366 PMCID: PMC4442058. Epub 2015/04/25. eng.
- 28 367 6. Baumert M, Seeck A, Faber R, Nalivaiko E, Voss A. Longitudinal changes in QT interval  
29 368 variability and rate adaptation in pregnancies with normal and abnormal uterine perfusion.  
30 369 *Hypertens Res*. 2010;33(6):555-60.
- 31 370 7. Lechmanova M, Kittnar O, Mlcek M, Slavicek J, Dohnalova A, Havranek S, et al. QT  
32 371 dispersion and T-loop morphology in late pregnancy and after delivery. *Physiological research /*  
33 372 *Academia Scientiarum Bohemoslovaca*. 2002;51(2):121-9.
- 34 373 8. Burchfield JS, Xie M, Hill JA. Pathological ventricular remodeling: mechanisms: part 1  
35 374 of 2. *Circulation*. 2013 Jul 23;128(4):388-400. PubMed PMID: 23877061. Pubmed Central  
36 375 PMCID: PMC3801217. Epub 2013/07/24. eng.
- 37 376 9. Parikh NI, Lloyd-Jones DM, Ning H, Ouyang P, Polak JF, Lima JA, et al. Association of  
38 377 number of live births with left ventricular structure and function. *The Multi-Ethnic Study of*  
39 378 *Atherosclerosis (MESA)*. *American heart journal*. 2012 Mar;163(3):470-6. PubMed PMID:  
40 379 22424019. Epub 2012/03/20. eng.
- 41 380 10. Sedlak T, Shufelt C, Iribarren C, Merz CN. Sex Hormones and the QT Interval: A  
42 381 Review. *J Womens Health*. 2012;4:4.
- 43 382 11. Kadish AH, Greenland P, Limacher MC, Frishman WH, Daugherty SA, Schwartz JB.  
44 383 Estrogen and progestin use and the QT interval in postmenopausal women. *Annals of*  
45 384 *noninvasive electrocardiology : the official journal of the International Society for Holter and*  
46 385 *Noninvasive Electrocardiology, Inc*. 2004;9(4):366-74.
- 47 386 12. Design of the Women's Health Initiative clinical trial and observational study. *The*  
48 387 *Women's Health Initiative Study Group*. *Controlled clinical trials*. 1998 Feb;19(1):61-109.  
49 388 PubMed PMID: 9492970. Epub 1998/03/11. eng.

- 1  
2  
3 389 13. Rossouw JE, Anderson GL, Prentice RL, LaCroix AZ, Kooperberg C, Stefanick ML, et  
4 390 al. Risks and benefits of estrogen plus progestin in healthy postmenopausal women: principal  
5 391 results From the Women's Health Initiative randomized controlled trial. *JAMA: The Journal of*  
6 392 *the American Medical Association*. 2002 07/17/;288(3):321-33. PubMed PMID: 507.
- 8 393 14. Chobanian AV, Bakris GL, Black HR, Cushman WC, Green LA, Izzo JL, Jr., et al. The  
9 394 Seventh Report of the Joint National Committee on Prevention, Detection, Evaluation, and  
10 395 Treatment of High Blood Pressure: the JNC 7 report. *JAMA: The Journal of the American*  
11 396 *Medical Association*. 2003 05/21/;289(19):2560-72. PubMed PMID: 51.
- 12 397 15. Rautaharju PM, Kooperberg C, Larson JC, LaCroix A. Electrocardiographic  
13 398 abnormalities that predict coronary heart disease events and mortality in postmenopausal  
14 399 women: the Women's Health Initiative. *Circulation*. 2006 Jan 31;113(4):473-80. PubMed PMID:  
16 400 16449726. Epub 2006/02/02. eng.
- 17 401 16. Bobrow KL, Quigley MA, Green J, Reeves GK, Beral V. Persistent effects of women's  
18 402 parity and breastfeeding patterns on their body mass index: results from the Million Women  
19 403 Study. *International journal of obesity (2005)*. 2013 May;37(5):712-7. PubMed PMID:  
20 404 22777544. Pubmed Central PMCID: PMC3647235. Epub 2012/07/11. eng.
- 22 405 17. Vaidya D, Bennett WL, Sibley CT, Polak JF, Herrington DM, Ouyang P. Association of  
23 406 parity with carotid diameter and distensibility: multi-ethnic study of atherosclerosis.  
24 407 *Hypertension*. 2014 Aug;64(2):253-8. PubMed PMID: 24842921. Pubmed Central PMCID:  
25 408 PMC4184976. Epub 2014/05/21. eng.
- 26 409 18. Giubertoni E, Bertelli L, Bartolacelli Y, Origliani G, Modena MG. Parity as predictor of  
27 410 early hypertension during menopausal transition. *Journal of hypertension*. 2013 Mar;31(3):501-  
28 411 7; discussion 7. PubMed PMID: 23196900. Epub 2012/12/01. eng.
- 30 412 19. Magnani JW, Johnson VM, Sullivan LM, Lubitz SA, Schnabel RB, Ellinor PT, et al. P-  
31 413 wave indices: derivation of reference values from the Framingham Heart Study. *Annals of*  
32 414 *noninvasive electrocardiology : the official journal of the International Society for Holter and*  
33 415 *Noninvasive Electrocardiology, Inc*. 2010 Oct;15(4):344-52. PubMed PMID: 20946557. Pubmed  
34 416 Central PMCID: PMC3394095. Epub 2010/10/16. eng.
- 35 417 20. Ouzounian JG, Elkayam U. Physiologic changes during normal pregnancy and delivery.  
36 418 *Cardiology clinics*. 2012 Aug;30(3):317-29. PubMed PMID: 22813360. Epub 2012/07/21. eng.
- 38 419 21. Ozmen N, Cebeci BS, Yiginer O, Muhcu M, Kardesoglu E, Dincturk M. P-wave  
39 420 dispersion is increased in pregnancy due to shortening of minimum duration of P: does this have  
40 421 clinical significance? *The Journal of international medical research*. 2006 Sep-Oct;34(5):468-74.  
41 422 PubMed PMID: 17133775. Epub 2006/12/01. eng.
- 42 423 22. Karabag T, Hanci V, Aydin M, Dogan SM, Turan IO, Yildirim N, et al. Influence of  
43 424 menstrual cycle on p wave dispersion. *International heart journal*. 2011;52(1):23-6. PubMed  
44 425 PMID: 21321464. Epub 2011/02/16. eng.
- 46 426 23. Mueller NT, Pereira MA, Demerath EW, Dreyfus JG, MacLehose RF, Carr JJ, et al.  
47 427 Earlier menarche is associated with fatty liver and abdominal ectopic fat in midlife, independent  
48 428 of young adult BMI: The CARDIA study. *Obesity (Silver Spring, Md)*. 2015 Feb;23(2):468-74.  
49 429 PubMed PMID: 25521620. Pubmed Central PMCID: PMC4310794. Epub 2014/12/19. eng.
- 50 430 24. Janghorbani M, Mansourian M, Hosseini E. Systematic review and meta-analysis of age  
51 431 at menarche and risk of type 2 diabetes. *Acta diabetologica*. 2014 Aug;51(4):519-28. PubMed  
52 432 PMID: 24671509. Epub 2014/03/29. eng.
- 54 433 25. McManus DD, Xanthakis V, Sullivan LM, Zachariah J, Aragam J, Larson MG, et al.  
55 434 Longitudinal tracking of left atrial diameter over the adult life course: Clinical correlates in the

1  
2  
3 435 community. *Circulation*. 2010 Feb 9;121(5):667-74. PubMed PMID: 20100973. Pubmed Central  
4 436 PMCID: PMC2823068. Epub 2010/01/27. eng.  
5 437 26. Sedlak T, Shufelt C, Iribarren C, Merz CN. Sex hormones and the QT interval: a review.  
6 438 *Journal of women's health* (2002). 2012 Sep;21(9):933-41. PubMed PMID: 22663191. Pubmed  
7 439 Central PMCID: PMC3430484. Epub 2012/06/06. eng.

8 440

9 441

10 442

11  
12  
13  
14  
15  
16  
17  
18  
19  
20  
21  
22  
23  
24  
25  
26  
27  
28  
29  
30  
31  
32  
33  
34  
35  
36  
37  
38  
39  
40  
41  
42  
43  
44  
45  
46  
47  
48  
49  
50  
51  
52  
53  
54  
55  
56  
57  
58  
59  
60

For peer review only

1  
2  
3  
4  
5  
6  
7  
8  
9  
10  
11  
12  
13  
14  
15  
16  
17  
18  
19  
20  
21  
22  
23  
24  
25  
26  
27  
28  
29  
30  
31  
32  
33  
34  
35  
36  
37  
38  
39  
40  
41  
42  
43  
44  
45  
46  
47  
48  
49  
50  
51  
52  
53  
54  
55  
56  
57  
58  
59  
60

443 **Figure Legend: Creation of the Study Sample.** Clinical Trials include Hormone Trial, Dietary  
444 Modification and Calcium/Vitamin D. ECG=electrocardiogram, CVD=Cardiovascular diseases.  
445

For peer review only

446 **Table 1: Baseline Characteristics of the Study Sample**

| Distribution of Covariates by Number of Live Births | Never pregnant |              |              |              |              |
|-----------------------------------------------------|----------------|--------------|--------------|--------------|--------------|
|                                                     |                | 0            | 1            | 2-4          | 5+           |
| n (%)                                               | 3296 (8.1)     | 1082 (2.7)   | 3536 (8.7)   | 26599 (65.4) | 6174 (15.2)  |
| Age (y), Mean (SD)                                  | 61.95 (7.43)   | 60.4 (7.36)  | 61.14 (7.32) | 62.23 (6.87) | 64.14 (5.97) |
| BMI, Median (IQR)                                   | 27.39 (7.72)   | 27.74 (8.02) | 27.69 (7.56) | 27.73 (7.34) | 28.78 (7.45) |
| Age at menopause (y), Median (IQR)                  | 48 (8)         | 49 (7)       | 49 (8)       | 50 (7)       | 50 (8)       |
| Age at menarche (y), Mean (SD)                      | 12.54 (1.48)   | 12.55 (1.57) | 12.58 (1.54) | 12.58 (1.47) | 12.67 (1.46) |
| Duration of reproductive period (y), Median (IQR)   | 36 (8)         | 36 (8)       | 36 (8)       | 37 (8)       | 37 (7)       |
| Race/Ethnicity, N (%)                               |                |              |              |              |              |
| American Indian/Alaskan Native                      | 3 (0.1)        | 3 (0.3)      | 13 (0.4)     | 96 (0.4)     | 32 (0.5)     |
| Asian/PI                                            | 121 (3.7)      | 33 (3)       | 102 (2.9)    | 728 (2.7)    | 106 (1.7)    |
| African-American                                    | 263 (8)        | 203 (18.8)   | 604 (17.1)   | 2126 (8)     | 598 (9.7)    |
| Hispanic                                            | 106 (3.2)      | 50 (4.6)     | 160 (4.5)    | 1005 (3.8)   | 300 (4.9)    |
| White                                               | 2767 (84)      | 780 (72.1)   | 2601 (73.6)  | 22352 (84)   | 5056 (81.9)  |
| Other                                               | 36 (1.1)       | 13 (1.2)     | 56 (1.6)     | 292 (1.1)    | 82 (1.3)     |
| Education Level, N (%)                              |                |              |              |              |              |
| No high school diploma                              | 73 (2.2)       | 41 (3.8)     | 157 (4.4)    | 1033 (3.9)   | 543 (8.8)    |
| High school diploma                                 | 1352 (41)      | 490 (45.3)   | 1872 (52.9)  | 15726 (59.1) | 4096 (66.3)  |
| Bachelor's degree                                   | 802 (24.3)     | 250 (23.1)   | 801 (22.7)   | 5859 (22)    | 1087 (17.6)  |
| Graduate degree                                     | 1069 (32.4)    | 301 (27.8)   | 706 (20)     | 3981 (15)    | 448 (7.3)    |
| Household Income, N (%)                             |                |              |              |              |              |
| < \$50,000                                          | 2071 (62.8)    | 639 (59.1)   | 2136 (60.4)  | 15872 (59.7) | 4543 (73.6)  |
| \$50 to 100,000                                     | 974 (29.6)     | 333 (30.8)   | 1090 (30.8)  | 8260 (31.1)  | 1330 (21.5)  |
| > \$100,000                                         | 251 (7.6)      | 110 (10.2)   | 310 (8.8)    | 2467 (9.3)   | 301 (4.9)    |

|                                 |               |             |                |                 |                |
|---------------------------------|---------------|-------------|----------------|-----------------|----------------|
| Hypertension, N (%)             |               |             |                |                 |                |
| Treated                         | 712<br>(21.6) | 240 (22.2)  | 819 (23.2)     | 6141 (23.1)     | 1638<br>(26.5) |
| Untreated                       | 276<br>(8.4)  | 100 (9.2)   | 278 (7.9)      | 2045 (7.7)      | 491<br>(8)     |
| History of Diabetes, N (%)      | 150<br>(4.6)  | 57<br>(5.3) | 179 (5.1)      | 1377 (5.2)      | 434<br>(7)     |
| History of Breastfeeding, N (%) | 6<br>(0.2)    | 36<br>(3.3) | 1476<br>(41.7) | 15375<br>(57.8) | 4258 (69)      |
| History of HT, N (%)            |               |             |                |                 |                |
| Never used                      | 1520 (46.1)   | 478 (44.2)  | 1601<br>(45.3) | 11660<br>(43.8) | 3324<br>(53.8) |
| Past user                       | 561<br>(17)   | 191 (17.7)  | 575 (16.3)     | 4780<br>(18)    | 1147<br>(18.6) |
| Current user                    | 1215 (36.9)   | 413 (38.2)  | 1360<br>(38.5) | 10159<br>(38.2) | 1703<br>(27.6) |

447

448

449 **Table 1: Unadjusted and multivariable-adjusted association of number of pregnancies**  
 450 **leading to livebirths and reproductive period duration with PR interval (ms) in N=40,687**  
 451 **women in the Womens Health Initiative Clinical Trials**

|                                                                                                                    | <b>Unadjusted<br/>Effect<br/>(95% CI)</b> | <b>Multivariable<br/>Adjusted<br/>Effect*<br/>(95% CI)</b> |                                 |
|--------------------------------------------------------------------------------------------------------------------|-------------------------------------------|------------------------------------------------------------|---------------------------------|
| <b>Number of live births and reproductive period duration are each in their own separate multivariable models.</b> |                                           |                                                            |                                 |
| Number of Live Births<br>( <i>categorical with never pregnant as referent category</i> )                           |                                           |                                                            | p value for linear trend= 0.11  |
| Never Pregnant                                                                                                     | Ref.                                      | Ref.                                                       |                                 |
| None                                                                                                               | 1.44<br>(-0.18,3.06)                      | 1.15<br>(-0.43, 2.74)                                      |                                 |
| 1                                                                                                                  | 1.16<br>(0.04,2.28)                       | 0.54<br>(-0.57, 1.66)                                      |                                 |
| 2-4                                                                                                                | 1.20<br>(0.34,2.05)                       | 0.59<br>(-0.301, 1.48)                                     |                                 |
| 5+                                                                                                                 | 3.06<br>(2.07,4.06)                       | 1.32<br>(0.25, 2.39)                                       |                                 |
| Reproductive period duration ( <i>continuous, years</i> )                                                          |                                           |                                                            | p value for interaction = 0.009 |
| Never HT User                                                                                                      | 0.05<br>(-0.01, 0.11)                     | 0.10<br>(0.04, 0.16)                                       |                                 |
| Past HT use                                                                                                        | 0.002<br>(-0.07, 0.08)                    | 0.08<br>(-0.00,0.15)                                       |                                 |
| Current HT use                                                                                                     | -0.09<br>(-0.15, -0.03)                   | -0.02<br>(-0.08, 0.04)                                     |                                 |

452 \*Covariates include age, baseline BMI, baseline hypertension status, history of diabetes, income,  
 453 education, race/ethnicity, region, history/ duration of breastfeeding, antianxiety medication,  
 454 antidepressant medication, lipid medication, oophorectomy status, hysterectomy status, hormone  
 455 use history, heart rate and QRS duration  
 456 HT=hormone therapy



462 **Table 3: Unadjusted and multivariable-adjusted association of number of pregnancies**  
 463 **leading to livebirths and reproductive period duration with QTc interval (ms) in N=40,687**  
 464 **women in the Womens Health Initiative and Clinical Trials**

|                                                                                                          | <b>Unadjusted<br/>Effect<br/>(95% CI)</b> | <b>Multivariable<br/>Adjusted<br/>Effect*<br/>(95% CI)</b> | <b>P value</b>                 |
|----------------------------------------------------------------------------------------------------------|-------------------------------------------|------------------------------------------------------------|--------------------------------|
| <b>Number of live births and reproductive period duration are each in their own multivariable models</b> |                                           |                                                            |                                |
| Number of Live Births<br>( <i>categorical with never pregnant as referent category</i> )                 |                                           |                                                            | p value for linear trend=0.008 |
| Never Pregnant                                                                                           | Ref.                                      | Ref.                                                       |                                |
| None                                                                                                     | 0.54<br>(-0.76,1.83)                      | 0.66<br>(-0.56, 1.88)                                      |                                |
| 1                                                                                                        | 0.29<br>(-0.60,1.18)                      | 0.15<br>(-0.71, 1.02)                                      |                                |
| 2-4                                                                                                      | 0.63<br>(-0.05,1.31)                      | 0.25<br>(-0.43, 0.94)                                      |                                |
| 5+                                                                                                       | 2.39<br>(1.59,3.19)                       | 1.15<br>(0.33, 1.98)                                       |                                |
| Reproductive period duration<br>( <i>continuous, years</i> )                                             | -0.09<br>(-0.12,-0.06)                    | -0.04<br>(-0.07, -0.01)                                    | p value=0.01                   |

465 \*Covariates for number of livebirths analysis include age, baseline BMI, baseline hypertension  
 466 status, history of diabetes, income, education, race/ethnicity, region, history/ duration of  
 467 breastfeeding, antianxiety medication, antidepressant medication, lipid medication,  
 468 oophorectomy status, hysterectomy status, hormone use history, heart rate and QRS duration.  
 469 Covariates for reproductive period duration analysis include live births, age, baseline BMI,  
 470 baseline hypertension status, history of diabetes, income, education, race/ethnicity, region,  
 471 history of breastfeeding, duration of breastfeeding, antianxiety medication, antidepressant  
 472 medication, lipid medication, oophorectomy status, hysterectomy status, hormone use history,  
 473 and QRS duration.  
 474 HT=hormone therapy  
 475

476 **Table 4: Unadjusted and multivariable-adjusted associations between number of**  
 477 **pregnancies leading to livebirths with p wave duration and p wave dispersion in N=39,338\***  
 478 **women in the Women's Health Initiative and Clinical Trials**

| Dependent Variable             | Number of Live Births | Unadjusted Effect (95% CI) | Adjusted Effect (95% CI) |                                |
|--------------------------------|-----------------------|----------------------------|--------------------------|--------------------------------|
| <b>PR wave duration (ms)</b>   | Never Pregnant        | Ref.                       | Ref.                     | p value for linear trend =0.73 |
|                                | None                  | 0.09<br>(-0.73, 0.92)      | 0.09<br>(-0.69, 0.87)    |                                |
|                                | 1                     | -0.06<br>(-0.63, 0.51)     | -0.20<br>(-0.76, 0.35)   |                                |
|                                | 2-4                   | -0.03<br>(-0.47, 0.40)     | -0.26<br>(-0.70, 0.18)   |                                |
|                                | 5+                    | 0.99<br>(0.49, 1.50)       | -0.22<br>(-0.74, 0.31)   |                                |
| <b>PR wave dispersion (ms)</b> | Never Pregnant        | Ref.                       | Ref.                     | p for linear trend =0.13       |
|                                | None                  | 0.67<br>(-0.42, 1.77)      | 0.64<br>(-0.45, 1.72)    |                                |
|                                | 1                     | 0.44<br>(-0.32, 1.20)      | 0.34<br>(-0.42, 1.11)    |                                |
|                                | 2-4                   | 0.72<br>(0.15, 1.30)       | 0.62<br>(0.01, 1.24)     |                                |
|                                | 5+                    | 1.49<br>(0.82, 2.17)       | 0.94<br>(0.20, 1.67)     |                                |

479 Effect estimates correspond to expected ms increase in the specified interval measure for each  
 480 parity group relative to the never pregnant group. Fully adjusted models were adjusted for age,  
 481 baseline BMI, baseline hypertension status, history of diabetes, income, education,  
 482 race/ethnicity, region, history of breastfeeding, antianxiety medication, antidepressant  
 483 medication, lipid medication, duration of breastfeeding, oophorectomy status, hysterectomy  
 484 status, hormone use history, heart rate, and QRS duration.

485 \*n differs from main analyses due to the exclusion of women with implausible PR wave  
 486 measures

490 **Table 5: Unadjusted and multivariable-adjusted associations between reproductive period**  
 491 **duration and PR wave measures and PR dispersion in N= 31,538\* Women in the Women's**  
 492 **Health Initiative Clinical Trial.**

| Dependent Variable      | Hormone Use Status | Unadjusted Effect (95% CI) | Adjusted Effect (95% CI) |                                    |
|-------------------------|--------------------|----------------------------|--------------------------|------------------------------------|
| PR wave max (ms)        | Never User         | 0.07<br>(0.03, 0.11)       | 0.09<br>(0.06, 0.13)     | p value for interaction=<br>0.0009 |
| PR wave max (ms)        | Past               | -0.04<br>(-0.08, 0.005)    | 0.01<br>(-0.03, 0.05)    |                                    |
| PR wave max (ms)        | Current            | -0.03<br>(-0.06, 0.004)    | 0.01<br>(-0.02, 0.05)    |                                    |
| PR wave dispersion (ms) | Never User         | 0.002<br>(-0.04, 0.05)     | 0.01<br>(-0.03, 0.06)    | p value for interaction=<br>0.65   |
| PR wave dispersion (ms) | Past               | -0.03<br>(-0.09, 0.02)     | -0.01<br>(-0.06, 0.05)   |                                    |
| PR wave dispersion (ms) | Current            | -0.04<br>(-0.08, 0.003)    | -0.02<br>(-0.06, 0.03)   |                                    |

493 Effect estimates correspond to expected ms increase in PR measure. These models contained an  
 494 interaction term for reproductive period duration hormone use status. Fully adjusted models were  
 495 adjusted for number of live births, age, baseline BMI, baseline hypertension status, history of  
 496 diabetes, income, education, race/ethnicity, region, history of breastfeeding, duration of  
 497 breastfeeding, antianxiety medication, antidepressant medication, lipid medication,  
 498 oophorectomy status, hysterectomy status, hormone use history, heart rate, and QRS duration.

499 \*n differs from main analyses due to the exclusion of women with implausible PR wave  
 500 measures  
 501

**Figure.**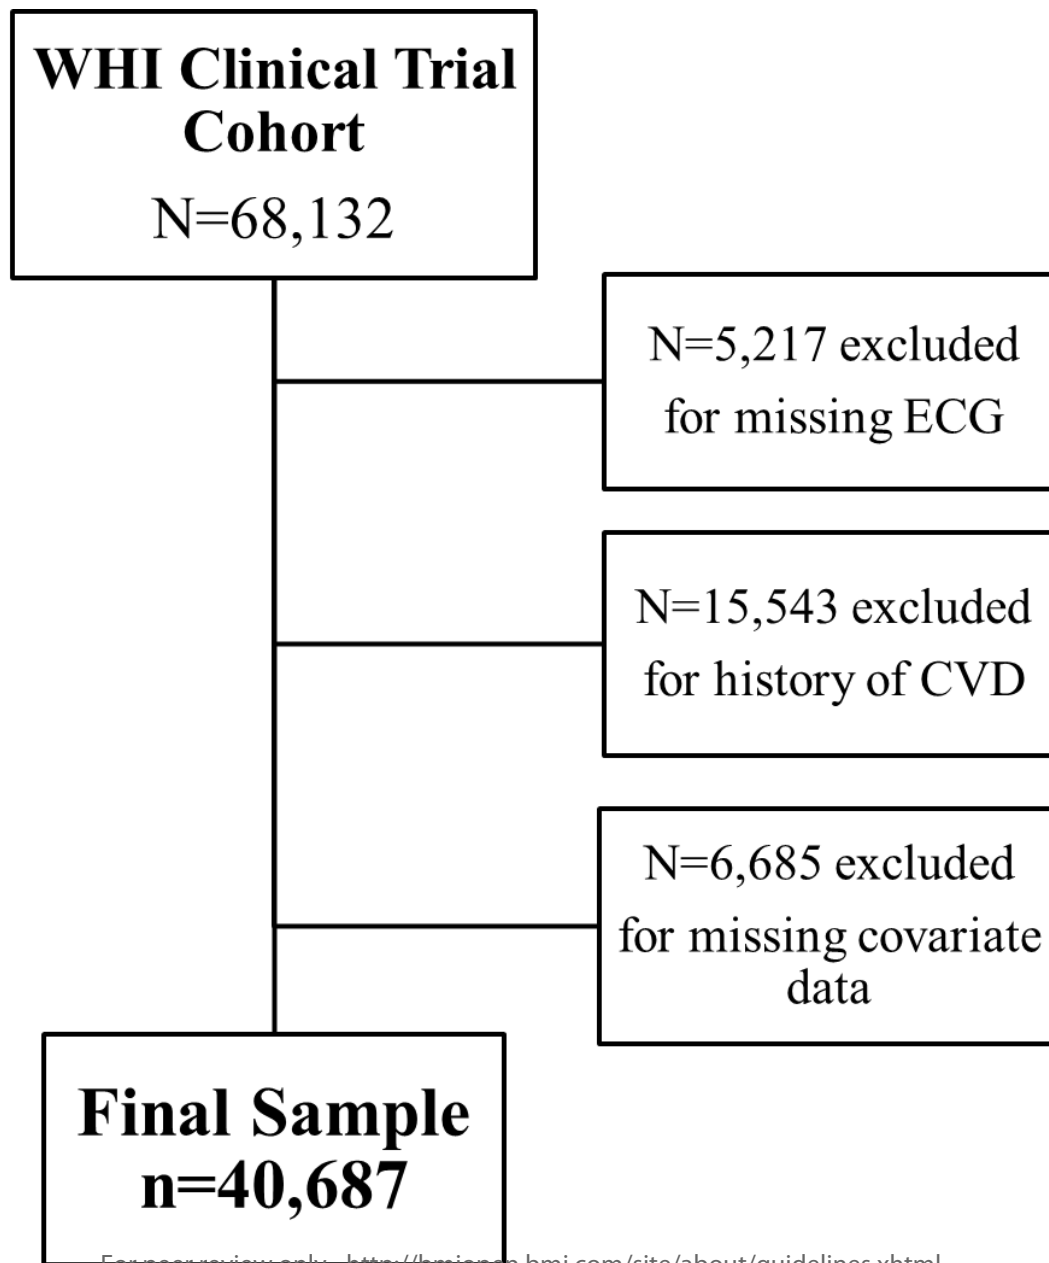

STROBE Statement—checklist of items that should be included in reports of observational studies with page number in manuscript.

|                              | Item No | Recommendation                                                                                                                                                                                                                                                                                                                                                                                                                                                         | Page number |
|------------------------------|---------|------------------------------------------------------------------------------------------------------------------------------------------------------------------------------------------------------------------------------------------------------------------------------------------------------------------------------------------------------------------------------------------------------------------------------------------------------------------------|-------------|
| <b>Title and abstract</b>    | 1       | (a) Indicate the study's design with a commonly used term in the title or the abstract                                                                                                                                                                                                                                                                                                                                                                                 | 1           |
|                              |         | (b) Provide in the abstract an informative and balanced summary of what was done and what was found                                                                                                                                                                                                                                                                                                                                                                    | 3           |
| <b>Introduction</b>          |         |                                                                                                                                                                                                                                                                                                                                                                                                                                                                        |             |
| Background/rationale         | 2       | Explain the scientific background and rationale for the investigation being reported                                                                                                                                                                                                                                                                                                                                                                                   | 5-6         |
| Objectives                   | 3       | State specific objectives, including any prespecified hypotheses                                                                                                                                                                                                                                                                                                                                                                                                       | 6           |
| <b>Methods</b>               |         |                                                                                                                                                                                                                                                                                                                                                                                                                                                                        |             |
| Study design                 | 4       | Present key elements of study design early in the paper                                                                                                                                                                                                                                                                                                                                                                                                                | 7-8         |
| Setting                      | 5       | Describe the setting, locations, and relevant dates, including periods of recruitment, exposure, follow-up, and data collection                                                                                                                                                                                                                                                                                                                                        | 7-8         |
| Participants                 | 6       | (a) <i>Cohort study</i> —Give the eligibility criteria, and the sources and methods of selection of participants. Describe methods of follow-up<br><i>Case-control study</i> —Give the eligibility criteria, and the sources and methods of case ascertainment and control selection. Give the rationale for the choice of cases and controls<br><i>Cross-sectional study</i> —Give the eligibility criteria, and the sources and methods of selection of participants | 7-8         |
|                              |         | (b) <i>Cohort study</i> —For matched studies, give matching criteria and number of exposed and unexposed<br><i>Case-control study</i> —For matched studies, give matching criteria and the number of controls per case                                                                                                                                                                                                                                                 | N/A         |
| Variables                    | 7       | Clearly define all outcomes, exposures, predictors, potential confounders, and effect modifiers. Give diagnostic criteria, if applicable                                                                                                                                                                                                                                                                                                                               | 7-10        |
| Data sources/<br>measurement | 8*      | For each variable of interest, give sources of data and details of methods of assessment (measurement). Describe comparability of assessment methods if there is more than one group                                                                                                                                                                                                                                                                                   | 7-10        |
| Bias                         | 9       | Describe any efforts to address potential sources of bias                                                                                                                                                                                                                                                                                                                                                                                                              | 7-10        |
| Study size                   | 10      | Explain how the study size was arrived at                                                                                                                                                                                                                                                                                                                                                                                                                              | 7           |
| Quantitative variables       | 11      | Explain how quantitative variables were handled in the analyses. If applicable, describe which groupings were chosen and why                                                                                                                                                                                                                                                                                                                                           | 7-10        |
| Statistical methods          | 12      | (a) Describe all statistical methods, including those used to control for confounding                                                                                                                                                                                                                                                                                                                                                                                  | 8-10        |
|                              |         | (b) Describe any methods used to examine subgroups and interactions                                                                                                                                                                                                                                                                                                                                                                                                    | 8-10        |
|                              |         | (c) Explain how missing data were addressed                                                                                                                                                                                                                                                                                                                                                                                                                            | 10          |
|                              |         | (d) <i>Cohort study</i> —If applicable, explain how loss to follow-up was addressed<br><i>Case-control study</i> —If applicable, explain how matching of cases and controls was addressed<br><i>Cross-sectional study</i> —If applicable, describe analytical methods taking account of sampling strategy                                                                                                                                                              | 7           |
|                              |         | (e) Describe any sensitivity analyses                                                                                                                                                                                                                                                                                                                                                                                                                                  | 10          |

Continued on next page

| <b>Results</b>           |     | <b>Page number</b>                                                                                                                                                                                           |       |
|--------------------------|-----|--------------------------------------------------------------------------------------------------------------------------------------------------------------------------------------------------------------|-------|
| Participants             | 13* | (a) Report numbers of individuals at each stage of study—eg numbers potentially eligible, examined for eligibility, confirmed eligible, included in the study, completing follow-up, and analysed            | 7     |
|                          |     | (b) Give reasons for non-participation at each stage                                                                                                                                                         | 7     |
|                          |     | (c) Consider use of a flow diagram                                                                                                                                                                           | 7     |
| Descriptive data         | 14* | (a) Give characteristics of study participants (eg demographic, clinical, social) and information on exposures and potential confounders                                                                     | 7     |
|                          |     | (b) Indicate number of participants with missing data for each variable of interest                                                                                                                          | 7     |
|                          |     | (c) <i>Cohort study</i> —Summarise follow-up time (eg, average and total amount)                                                                                                                             | N/A   |
| Outcome data             | 15* | <i>Cohort study</i> —Report numbers of outcome events or summary measures over time                                                                                                                          |       |
|                          |     | <i>Case-control study</i> —Report numbers in each exposure category, or summary measures of exposure                                                                                                         |       |
|                          |     | <i>Cross-sectional study</i> —Report numbers of outcome events or summary measures                                                                                                                           | 7     |
| Main results             | 16  | (a) Give unadjusted estimates and, if applicable, confounder-adjusted estimates and their precision (eg, 95% confidence interval). Make clear which confounders were adjusted for and why they were included | 20-21 |
|                          |     | (b) Report category boundaries when continuous variables were categorized                                                                                                                                    | 20-21 |
|                          |     | (c) If relevant, consider translating estimates of relative risk into absolute risk for a meaningful time period                                                                                             | 10-11 |
| Other analyses           | 17  | Report other analyses done—eg analyses of subgroups and interactions, and sensitivity analyses                                                                                                               | 10-11 |
| <b>Discussion</b>        |     |                                                                                                                                                                                                              |       |
| Key results              | 18  | Summarise key results with reference to study objectives                                                                                                                                                     | 12    |
| Limitations              | 19  | Discuss limitations of the study, taking into account sources of potential bias or imprecision. Discuss both direction and magnitude of any potential bias                                                   | 14-15 |
| Interpretation           | 20  | Give a cautious overall interpretation of results considering objectives, limitations, multiplicity of analyses, results from similar studies, and other relevant evidence                                   | 15    |
| Generalisability         | 21  | Discuss the generalisability (external validity) of the study results                                                                                                                                        | 15    |
| <b>Other information</b> |     |                                                                                                                                                                                                              |       |
| Funding                  | 22  | Give the source of funding and the role of the funders for the present study and, if applicable, for the original study on which the present article is based                                                | 1     |

\*Give information separately for cases and controls in case-control studies and, if applicable, for exposed and unexposed groups in cohort and cross-sectional studies.

**Note:** An Explanation and Elaboration article discusses each checklist item and gives methodological background and published examples of transparent reporting. The STROBE checklist is best used in conjunction with this article (freely available on the Web sites of PLoS Medicine at <http://www.plosmedicine.org/>, Annals of Internal Medicine at <http://www.annals.org/>, and Epidemiology at <http://www.epidem.com/>). Information on the STROBE Initiative is available at [www.strobe-statement.org](http://www.strobe-statement.org).

# BMJ Open

## Effects of Reproductive Period Duration and Number of Pregnancies on Mid-Life Electrocardiographic Indices: A Secondary Analysis from the Women's Health Initiative Clinical Trial

|                                 |                                                                                                                                                                                                                                                                                                                                                                                                                                                                                                                                                                                        |
|---------------------------------|----------------------------------------------------------------------------------------------------------------------------------------------------------------------------------------------------------------------------------------------------------------------------------------------------------------------------------------------------------------------------------------------------------------------------------------------------------------------------------------------------------------------------------------------------------------------------------------|
| Journal:                        | <i>BMJ Open</i>                                                                                                                                                                                                                                                                                                                                                                                                                                                                                                                                                                        |
| Manuscript ID                   | bmjopen-2017-019129.R1                                                                                                                                                                                                                                                                                                                                                                                                                                                                                                                                                                 |
| Article Type:                   | Research                                                                                                                                                                                                                                                                                                                                                                                                                                                                                                                                                                               |
| Date Submitted by the Author:   | 20-Apr-2018                                                                                                                                                                                                                                                                                                                                                                                                                                                                                                                                                                            |
| Complete List of Authors:       | Parikh, Nisha; University of California San Francisco, Medicine<br>Kapphahn, Kristopher; Stanford University School of Medicine<br>Haley, Haley; Stanford University School of Medicine<br>Olgin, Jeffrey; University of California San Francisco, Medicine<br>Allison, Matthew; UCSD,<br>Magnani, Jared; University of Pittsburgh, Medicine<br>Ryckman, KK; University of Iowa, Epidemiology<br>Waring, Molly ; University of Connecticut, Allied Health Sciences<br>Perez, Marco; Stanford University, Cardiovascular Medicine<br>Howard, Barbara; MedStar Health Research Institute |
| <b>Primary Subject Heading</b>: | Cardiovascular medicine                                                                                                                                                                                                                                                                                                                                                                                                                                                                                                                                                                |
| Secondary Subject Heading:      | Reproductive medicine, Epidemiology, Obstetrics and gynaecology                                                                                                                                                                                                                                                                                                                                                                                                                                                                                                                        |
| Keywords:                       | women, Adult cardiology < CARDIOLOGY, menopause, ECG, pregnancy                                                                                                                                                                                                                                                                                                                                                                                                                                                                                                                        |
|                                 |                                                                                                                                                                                                                                                                                                                                                                                                                                                                                                                                                                                        |

SCHOLARONE™  
Manuscripts

# Effects of Reproductive Period Duration and Number of Pregnancies on Mid-Life Electrocardiographic Indices: A Secondary Analysis from the Women's Health Initiative Clinical Trial

**Authors:** Nisha I. Parikh MD MPH (1), Kristopher Kapphahn PhD (2), Haley Hedlin PhD (2), Jeffrey E. Olgin MD (1), Matthew A. Allison MD (3), Jared W. Magnani MD (4), MSc, Kelli R. Ryckman PhD (5), Molly E. Waring PhD (6), Marco V. Perez MD (7), Barbara V. Howard PhD (8)

- 1) Division of Cardiology, University of California San Francisco, San Francisco, CA
- 2) Quantitative Sciences Unit, Department of Medicine, Stanford University School of Medicine.
- 3) Department of Family Medicine, La Jolla USCD
- 4) Division of Cardiology, Boston University School of Medicine, Boston, MA
- 5) Department of Epidemiology, College of Public Health, University of Iowa, IO
- 6) Division of Epidemiology of Chronic Diseases and Vulnerable Populations, Department of Quantitative Health Sciences, University of Massachusetts Medical School, Worcester, MA
- 7) Department of Medicine, Stanford University School of Medicine, Stanford, CA
- 8) MedStar Health Research Institute, Hyattsville, MD and Georgetown and Howard Universities Center for Clinical and Translational Science

*Corresponding author: Nisha I. Parikh, MD MPH*

*E-mail: parikh.nisha@gmail.com*

Running Title: Reproductive factors and electrocardiographic intervals

Key Words: endogenous estrogen, sex hormones, pregnancy, menarche, menopause, reproductive history, menarche, age at birth, repolarization, QTc, PR interval, electrocardiogram

Word Count: 4196

Funding: This work was supported by AHA grant 13CRP17350002 (NIP), NIH grants 7R21HL115398 (NIP), KL2TR000160 (MEW) and U01HL105268 (MEW), NHLBI/NIH & DHHS through contracts, HHSN268201100046C, HHSN268201100001C, HHSN268201100002C, HHSN268201100003C, HHSN268201100004C

*Conflict of Interest: None of the authors have any conflicts of interest in respect to this article*



1  
2  
3 **46 Abstract: (word count=264)**

4  
5 **47 Objective:** Pregnancy, menses and menopause are related to fluctuations in endogenous sex  
6  
7 **48** hormones in women, which cumulatively, may alter cardiac electrical conduction. Therefore, we  
8  
9 **49** sought to study the association between number of pregnancies and reproductive period duration  
10  
11 **50** (RD, time from menarche to menopause) with electrocardiographic intervals in the Women's  
12  
13 **51** Health Initiative Clinical Trials.

14  
15 **52 Methods:** In primary analyses, we employed multivariable linear regression models relating  
16  
17 **53** number of pregnancies and RD with millisecond (ms) changes in PR interval, P wave indices  
18  
19 **54** (duration and dispersion) and QTc from enrollment electrocardiogram.

20  
21 **55 Results:** Among 40,687 women (mean age=62 years), 5+ live births versus 0 prior pregnancies  
22  
23 **56** was associated with a 1.32 ms increase in PR interval [95% CI (0.25, 2.38)], with a graded  
24  
25 **57** association with longer QTc interval (ms) [none= 0.66 (-0.56, 1.88), 1= 0.15 (-0.71, 1.02), 2 to  
26  
27 **58** 4= 0.25 (-0.43, 0.94), and 5+ live births=1.15 (0.33, 1.98), p = 0.008]. RD was associated with  
28  
29 **59** longer PR interval and maximum P wave duration (but not P-wave dispersion) among never  
30  
31 **60** users of hormone therapy: [PR (ms) per additional RD year: 0.10 (0.04, 0.16); higher P-wave  
32  
33 **61** duration (ms): 0.09 (0.06, 0.12)]. For every year increase in reproductive period, QTc decreased  
34  
35 **62** by 0.04 ms (-0.07, -0.01).

36  
37 **63 Limitations:** Potential misclassification of RD due to participant recall

38  
39 **64 Conclusions:** An increasing number of live births are related to increased ventricular  
40  
41 **65** repolarization time whereas RD is related to decreased ventricular repolarization time. Both  
42  
43 **66** longer RD and grandmultiparity are related to increased atrial conduction time. Reproductive  
44  
45 **67** factors that alter midlife cardiac electrical conduction system remodeling in women may  
46  
47 **68** modestly influence CVD risk in later life.

48  
49  
50  
51  
52  
53  
54  
55  
56 **69**

1  
2  
3 **70 Article Summary:**  
4

5 **71 *Strengths and Limitations of the Study.***  
6

- 7  
8 **72**     • *A strength is the use of a well characterized multiethnic, large dataset of postmenopausal*  
9  
10 **73**       *women representative of women in the United States.*  
11  
12 **74**     • *A notable limitation is that the exposure variables were acquired retrospectively.*  
13  
14 **75**     • *We were unable to adjust for pregnancy complications such as preeclampsia or*  
15 **76**       *gestational diabetes.*  
16  
17  
18  
19  
20  
21  
22  
23

24 **79 **Key Words:** *endogenous estrogen, sex hormones, pregnancy, menarche, menopause,***  
25  
26 **80 *reproductive history, menarche, age at birth, repolarization, QTc, PR interval,***  
27  
28 **81 *electrocardiogram***  
29  
30  
31  
32  
33  
34

35 **84 **INTRODUCTION:****  
36

37 **85 *Electrocardiogram parameters reflect current as well as future CVD risk***  
38

39  
40 **86** Electrocardiographic parameters are reflections of both current as well as future cardiovascular  
41  
42 **87** disease risk. For example, in the Framingham Heart Study, a prolonged PR interval (> 200 ms)  
43  
44 **88** (which is defined as the period, measured in milliseconds, that extends from the beginning of the  
45  
46 **89** P wave (the onset of atrial depolarization) until the R wave), was related to incident atrial  
47  
48 **90** fibrillation, all-cause mortality and to the likelihood of needing a permanent pacemaker.(1) In  
49  
50 **91** addition to PR interval, the p wave duration (or the period in milliseconds during which the  
51  
52 **92** atrium depolarizes), more directly relates to atrial size and is an antecedent of atrial  
53  
54 **93** fibrillation.(2) Both PR interval and p wave duration are markers of left atrial size which in turn  
55  
56  
57  
58  
59  
60

1  
2  
3 94 is a correlate of hypertensive heart disease(3) and incident stroke.(4) P wave dispersion, defined  
4  
5 95 as the difference between the maximum and the minimum P-wave duration recorded from  
6  
7 96 multiple different-surface ECG leads, is an additional marker of atrial remodeling and antecedent  
8  
9  
10 97 of atrial fibrillation.(5) It is unclear to what extent PR interval, p wave duration or P wave  
11  
12 98 dispersion are affected by premenopausal hormonal fluctuations from the menstrual cycle and  
13  
14  
15 99 childbearing.  
16

100

### 101 *Pregnancy, cardiac remodeling and the electrocardiogram*

102 Pregnancy and the post-partum period both have substantial physiologic effects on cardiac  
103 electrophysiology. Physiologic studies of women during early and late pregnancy as well as early  
104 post-partum suggest a shortening of the corrected QT interval (QTc) which partially reverts back  
105 to pre-pregnancy values following post-partum.(6, 7) The QT interval is defined as the measure  
106 of time between the onset of ventricular depolarization and completion of ventricular  
107 repolarization, and because QT interval is strongly related to heart rate, the QTc is corrected for  
108 heart rate. Direct pathophysiologic links connecting myocardial structural remodeling and  
109 cardiac electrical remodeling have been increasingly recognized.(8) With regards to myocardial  
110 remodeling, pregnancy induced cardiac remodeling does not completely revert back to pre-  
111 pregnancy levels and effects of increasing parity on cardiac remodeling can be detected even in  
112 mid-life.(9) However, the extent to which an increasing number of pregnancies exerts long  
113 lasting effects on the cardiac electrical conduction system is uncertain.(9)

114

### 115 *Estrogen exposure and the electrocardiogram*

1  
2  
3 116 In addition to the more marked hormonal fluctuations seen during pregnancy, there are also more  
4  
5 117 subtle, cyclic changes in estrogen and progesterone cycling that occur during menstrual cycling  
6  
7  
8 118 in women of reproductive age. Testosterone and progesterone are recognized to decrease the  
9  
10 119 QTc interval.(10) Prior data from the Women's Health Initiative (WHI) Hormone Trial suggests  
11  
12 120 that estrogen-only post-menopausal therapy modestly prolongs QTc beyond that of both  
13  
14 121 estrogen-progestin therapy and placebo.(11) However, it is uncertain whether the pre-  
15  
16 122 menopausal endogenous hormonal fluctuations (reflected by the length of the interval from  
17  
18 123 menarche to menopause, and by number of pregnancies) are associated with changes in QTc in  
19  
20  
21 124 the WHI.  
22  
23  
24 125

25  
26 126 WHI represents a unique resource to study questions related to pregnancy and  
27  
28 127 reproductive history and ECG parameters and thus we sought to determine if there is a positive  
29  
30 128 or negative association between number of pregnancies and reproductive period duration with  
31  
32 129 mid-life electrocardiogram intervals (PR interval and QTc) and p wave parameters (p wave  
33  
34 130 maximum duration and dispersion).  
35  
36  
37  
38 131

#### 39 40 132 **METHODS AND ANALYSIS PLAN:**

41  
42 133 Our current study design is a secondary analysis of a previously conducted set of clinical trials. .  
43  
44

#### 45 134 *Study sample.*

46  
47  
48  
49 135 The WHI recruitment began in 1991 and consisted of a set of clinical trials/ and an  
50  
51 136 observational study on hormone therapy, dietary modification and calcium/ vitamin D  
52  
53 137 supplementation on cardiovascular disease, cancer and fractures.(12) The clinicaltrial.gov  
54  
55 138 identifier for the WHI is NCT00000611. At the time of enrollment, all women enrolled in the  
56  
57

1  
2  
3 139 WHI were required to be between 50 and 79 years old, postmenopausal, and intending to reside  
4  
5 140 in the area for at least 3 years. Other enrollment criteria have been previously described.(13) This  
6  
7 141 analysis drew from the cohort of women enrolled in the WHI clinical trials (and not  
8  
9 142 observational study), as WHI clinical trial participants has ECGs performed per protocol.  
10  
11 143 Informed consent was obtained from all participants at study enrollment. **Figure 1** shows the  
12  
13 144 creation of the study sample. Of 68,132 women in WHI Studies (post- menopausal hormone  
14  
15 145 therapy, diet and calcium/vitamin D and observational studies), we excluded 5,217 who were  
16  
17 146 missing ECGs and 15,543 who had prevalent CVD. Because number of pregnancies and  
18  
19 147 reproductive period (in particular age at menopause) are known to be associated with later CVD  
20  
21 148 and a history of CVD is related strongly with ECG changes including QTc and certainly  
22  
23 149 increased PR, we sought to exclude women with a history of CVD in order to assess associations  
24  
25 150 between reproductive period duration and number of pregnancies that were not directly mediated  
26  
27 151 through CVD. Of these, 47,372 women, 6,685 were further excluded for having missing  
28  
29 152 covariate data, leaving a final sample of included women =40,687. In a missing imputation  
30  
31 153 sensitivity analysis described below, we additionally analyzed the 6,685 women with missing  
32  
33 154 covariate data (total n=54,057).  
34  
35  
36  
37  
38  
39  
40

#### 41 *Patient and Public Involvement*

42  
43  
44 156 WHI was designed to address the gaps in knowledge about the major health issues in post  
45  
46 157 menopausal women. Patients assisted research staff in recruiting and results for all measures  
47  
48 158 done at the study examinations were explained to each participant. Major study results are  
49  
50 159 communicated to participants via newsletters.  
51  
52  
53

#### 54 160 *Ascertainment of Reproductive Exposures.*

1  
2  
3 161 Information on reproductive factors was collected via questionnaire at the second screening visit  
4  
5 162 in the WHI (between 1993-1998). Participants were asked how many times they had been  
6  
7 163 pregnant (were given choices ranging from 0 to 8+), number of live births, and how old they  
8  
9 164 were at the end of the first and at the end of their last pregnancy (<20, 20-24, 25-29,30-34,35+  
10  
11 165 years). Age at menarche (<9, 10,11,12,13,14,15,>16 years) and age at menopause was asked on  
12  
13 166 this screening questionnaire. Reproductive period duration (RD) was defined as the duration  
14  
15 167 between age at menarche to age at menopause (in years). Detailed current and prior hormone  
16  
17 168 therapy (or post-menopausal hormone replacement therapy) usage and  
18  
19 169 hysterectomy/oophorectomy status was collected at enrollment and has been previously  
20  
21 170 described.(14) Questions regarding the use and duration of oral contraceptive usage was also  
22  
23 171 collected at enrollment.  
24  
25  
26  
27  
28

29 172 *Ascertainment of Covariates:*  
30  
31

32  
33 173 Age, income, education, self-reported race/ethnicity, geographic region of United States, history  
34  
35 174 and duration of breastfeeding were collected at participant enrollment and second screening  
36  
37 175 examinations. Body mass index (BMI, kg/m<sup>2</sup>) was calculated using height and weight measured  
38  
39 176 by study staff at baseline. Women with hypertension were identified as those with a self-reported  
40  
41 177 history of treated hypertension or blood pressure measurements meeting JNC 7 criteria for  
42  
43 178 hypertension.(15) Diabetes was identified by self-reported use of anti-diabetic medications and  
44  
45 179 hyperlipidemia by use of cholesterol lowering medications.  
46  
47  
48  
49

50 180 *Electrocardiographic parameters:*  
51  
52

53 181 Standard 12-lead ECGs were recorded in all women by strictly standardized procedures in all  
54  
55 182 clinical centers as has been described.(16) All ECGs were processed in a central laboratory  
56  
57  
58  
59  
60

1  
2  
3 183 (EPICARE Center, University of Alberta, Edmonton, Canada, and later Wake Forest University,  
4  
5 184 Winston-Salem, NC), where they were visually inspected for technical errors and inadequate  
6  
7  
8 185 quality. ECGs were processed with the 2001 version of the Marquette 12-SL program (GE  
9  
10 186 Marquette). In addition to PR and QT intervals, we also examined the maximum P wave duration  
11  
12 187 and dispersion (from all 12 leads of the ECG).(2) The QT interval was corrected using Bazett's  
13  
14 188 formula. The Institutional Review Board of University of California San Francisco approved this  
15  
16  
17 189 study protocol.

18  
19  
20 190 *Statistical Methods:*

21  
22  
23 191 *Primary Analysis*

24  
25 192 We employed multivariable linear regression to assess the association between reproductive  
26  
27 193 exposures ( number of pregnancies and RD) with the dependent variable of ECG parameters  
28  
29 194 (PR interval in milliseconds, p wave duration, p wave dispersion, QTc in milliseconds).  
30  
31 195 Multivariable models were adjusted for a priori covariates: age, BMI, hypertension status,  
32  
33 196 diabetes, income, education, race/ethnicity, region, history of breastfeeding, antianxiety  
34  
35 197 medication, antidepressant medication, lipid medication, duration of breastfeeding,  
36  
37 198 oophorectomy status, hormone therapy use, heart rate and QRS duration. In analyses considering  
38  
39 199 categories of livebirths we employed a linear trend test.

40  
41  
42  
43 200 We explored effect modification of the primary exposures, number of live births and RD, by  
44  
45 201 hormone therapy usage and hysterectomy status. We classified hormone therapy usage into three  
46  
47 202 categories: women who reported current, prior or no hormone therapy usage. A statistical  
48  
49 203 interaction term between hormone therapy usage and the exposure (RD or number of live births)  
50  
51 204 was used to consider effect modification by reported hormone therapy use. When the statistical  
52  
53 205 interaction term was statistically significant ( $p < 0.05$ ) according to a likelihood ratio test, we  
54  
55  
56

1  
2  
3 206 presented the estimates in each of the three categories of hormone therapy use and we presented  
4  
5 207 a single estimate if there was no evidence for effect modification by hormone therapy. A similar  
6  
7 208 approach was employed for studying RD or number of live births and hysterectomy status. To  
8  
9  
10 209 show sensitivity of estimates to confounders, unadjusted associations were reported as well as  
11  
12 210 those associations adjusted for the confounders listed above.  
13

14  
15 211  
16  
17 212 *Secondary Analyses:*  
18  
19 213 In secondary analyses, we removed subjects who reported never being pregnant and used  
20  
21 214 multivariable linear regression to model associations between age at first live birth and the five  
22  
23 215 electrocardiographic measures. These models used the same covariates to adjust association as  
24  
25 216 those in our primary analyses. Subjects who had implausible secondary outcome values (i.e. all  
26  
27 217 zero values or all constant values across all electrocardiographic measures) were removed. We  
28  
29  
30 218 additionally adjusted for covariates that we were concerned may have confounded the  
31  
32 219 associations between exposure and dependent variables in our study. We additionally fit  
33  
34 220 additional models which included both RD and number of pregnancies to ensure that one  
35  
36 221 exposure did not alter the other's association with the dependent variables. Given that anxiety  
37  
38 222 and depression could affect both exposure and dependent variables in our study, we further  
39  
40 223 adjusted for use of these medications. Antianxiety and antidepressant medication use (selective  
41  
42 224 serotonin reuptake inhibitors (or SSRI) and non-SSRI) were recorded on enrollment by nurse  
43  
44 225 examination of medication bottles. Medications were classified according to the National Drug  
45  
46 226 Index classification system. We adjusted for Ca/Vitamin D status, oral contraceptive usage  
47  
48 227 (yes/no and duration or usage). We further adjusted for menstrual irregularities/fertility  
49  
50 228 disorders/and endometriosis, which are also related to hormonal fluctuations in women.  
51  
52  
53  
54  
55  
56  
57  
58  
59  
60



### 229 *Multiple Imputation Analyses*

230 There were n=6,685 women in our study with missing covariate data. We used multiple  
231 imputation techniques to impute missing covariates and refit models from primary analyses to  
232 explore the sensitivity of our results to missing data. We used the PROC MI in SAS to construct  
233 20 multiply imputed data sets. Missing variables were imputed via fully conditional specification  
234 method in PROC MI using all variables from the analytic model. We fit models to each imputed  
235 data set and pooled the results. The pooled results from imputation did not differ appreciably  
236 from the results of the complete case analysis (data not shown).

237 All analyses were performed in SAS 9.4 (SAS Institute, Cary NC, USA).

238

## 239 **RESULTS**

240 **Table 1** shows the baseline characteristics of our sample including women who were included in  
241 our study and those excluded from analysis for missing variables. Data is displayed by number of  
242 pregnancies lasting at least 6 months. The mean age at enrollment was 62.4 years, while the  
243 mean age at menarche was 12.6 and mean age at menopause was 50.0 years. 82.5% of women  
244 were White, 9.3% Black, 4% Hispanic and 2.7% Asian. Forty five percent of the study sample  
245 reported never having used hormone therapy prior to enrollment.

246

### 247 *PR interval*

248 Compared to women reporting never having been pregnant, having 5 or more pregnancies was  
249 associated with a 1.3 ms longer PR interval (**Table 2**). Among women who reported never  
250 having used hormones, each additional year of reported reproductive period duration was  
251 associated with a 0.1 ms longer PR interval (or atrial conduction velocity). Conversely, there

1  
2  
3 252 was no significant association between RD and PR interval among women who reported prior or  
4  
5 253 current hormone therapy use (p value for interaction < 0.01) (**Table 2**). Age at first live birth,  
6  
7 254 was not related to PR interval (data not shown).  
8  
9

### 10 255 *QTc*

11  
12 256 Compared to never having been pregnant, having 5 or more pregnancies was related to a 1.2 ms  
13  
14 257 longer QTc (**Table 3**). However, not carrying a pregnancy to term, or having 1 or 2-4 term  
15  
16 258 pregnancies (versus not being pregnant), were not related to QTc. For each additional year in  
17  
18 259 reproductive period duration, there was a 0.4 ms shorter QTc (**Table 3**). Restricting to women  
19  
20 260 who had at least one live birth did not change our results (data not shown).  
21  
22  
23

### 24 261 *P wave duration and dispersion*

25  
26 262 P wave dispersion was higher for women with 2-4 live births (ms increase =0.62, 95% CI: 0.01,  
27  
28 263 1.24) and 5 live births (0.94, 95% CI: 0.20, 1.67), compared with those who reported never  
29  
30 264 having been pregnant (**Table 4**). Reproductive period duration was related to maximum p wave  
31  
32 265 duration among women who reported never having used hormones (0.09, 95% CI: 0.06, 0.13)  
33  
34 266 but not among those who reported prior or current hormone therapy use (p interaction < 0.01)  
35  
36 267 (**Table 5**).  
37  
38  
39

40 268  
41  
42 269 Secondary results: Models that contained both RD and number of pregnancies together were not  
43  
44 270 materially different (data not shown). Further adjustment for antidepressants and anti-anxiety  
45  
46 271 medications did not materially affect our results. Further adjustment for Ca and Vitamin D status  
47  
48 272 or oral contraceptive use, and/or duration did not materially affect our results. Further adjustment  
49  
50 273 for menstrual irregularities/fertility disorders/and endometriosis did not materially change our  
51  
52 274 results.  
53  
54  
55  
56  
57  
58  
59  
60

1  
2  
3 2754  
5 2766  
7  
8 277 **DISCUSSION**9  
10 278 *Summary of Findings*

11  
12 279 We found that having five or more pregnancies compared to none was associated with a small  
13  
14 280 increase in mid-life atrial conduction time, independent of factors known to be associated with  
15  
16 281 this interval (PR). Number of live births among women with at least one live birth (compared to  
17  
18 282 no prior pregnancies) was associated with increased atrial conduction time. Having 5 or more  
19  
20 283 pregnancies was related to a small increase in ventricular repolarization time as compared to  
21  
22 284 having no prior pregnancies. Among women reporting no prior exogenous hormone use, each  
23  
24 285 additional year of reported RD was related to a very modest (0.1 ms) longer atrial conduction  
25  
26 286 time. RD was related to a very modest increase in p wave duration. RD was related to a shorter  
27  
28  
29  
30  
31 287 ventricular repolarization time.

32  
33 28834  
35 289 *Mechanisms linking pregnancy and atrial electrical remodeling*

36  
37 290 The effect of cumulative pregnancies on mid-life electrocardiograms would likely result from  
38  
39 291 both 1) the pregnancy itself and 2) incident cardiometabolic factors that are impacted by  
40  
41 292 pregnancy such as adiposity(17) and vascular stiffness,(18) and premenopausal blood  
42  
43 293 pressure.(19) Adiposity and blood pressure are related to increased P wave indices in a normal  
44  
45 294 healthy population,(20) and these P wave indices are electrocardiographic reflections of  
46  
47 295 increased left atrial pressure, size and potentially fibrosis. The period of pregnancy and the  
48  
49 296 peripartum are characterized by hormonal changes that affect both cardiovascular hemodynamics  
50  
51  
52 297 and adaptive myocardial remodeling.(21) Pregnancy causes increased cardiac output, increased  
53  
54  
55  
56  
57  
58  
59  
60

1  
2  
3 298 left ventricular mass, and decreased systemic vascular resistance.(22) The uterus and placenta in  
4  
5 299 support of the growing fetus and fetal circulatory system represent a significant vascular shunt  
6  
7  
8 300 which contributes to these hemodynamic adaptations in pregnancy.(22) The sum of these  
9  
10 301 changes result in both left atrial and left ventricular dilation. However, the effects of normal  
11  
12 302 pregnancy on electrographic remodeling during pregnancy are not well described. A prior small  
13  
14 303 clinical study has looked at P wave duration and P wave dispersion among pregnant women  
15  
16 304 compared with controls and found that both of these parameters are increased.(23)  
17  
18  
19 305

20  
21 306 *Pregnancy and cumulative effects on ventricular repolarization*

22  
23 307 A prior study in 37 women in late pregnancy compared with 18 age matched controls  
24  
25 308 demonstrated that QTc substantially prolongs late in pregnancy and that this only partially  
26  
27 309 corrects back to pre-pregnancy values post-partum.(7) Our finding that having 5 or more  
28  
29 310 pregnancies as compared to no prior pregnancies suggests that QTc prolongation during  
30  
31 311 pregnancy may accumulate across successive pregnancies and will be significantly increased on  
32  
33 312 mid-life ECG. Furthermore, we found evidence for a dose response relationship between number  
34  
35 313 of pregnancies and mid-life QTc. Cardiac electrical remodeling often reflects myocardial  
36  
37 314 remodeling. We previously demonstrated that an increasing number of pregnancies were related  
38  
39 315 to left ventricular volume increase and increase in left ventricular mass in a multiethnic cohort of  
40  
41 316 women.(9) The increase in cardiac volume and mass were more marked in grandmultipara's or  
42  
43 317 women who had 5 or more pregnancies leading to livebirths.(9) It is important to note that  
44  
45 318 grandmultiparity is less common with declining parity levels in the United States.  
46  
47  
48  
49  
50

51 319

52  
53 320 *Reproductive period duration and atrial conduction.*

1  
2  
3 321 The menstrual cycle consists of a relatively well described hormone cycling in women consisting  
4  
5 322 of both estrogen and progesterone as well as testosterone production. A longer reproductive  
6  
7 323 period duration reflects the cumulative exposure that a woman has to these endogenous  
8  
9  
10 324 fluctuations in sex hormone levels. Indeed, prior studies have assessed P wave parameters  
11  
12 325 throughout the menstrual cycle and noted that P wave duration is substantially increased in the  
13  
14 326 luteal phase.(24) Among women who did report taking prior hormone therapy, we observed a  
15  
16 327 very modest but significant increase in mid-life PR interval and in P wave duration. Exogenous  
17  
18 328 hormone therapy use may obscure the relationship between endogenous hormone exposure from  
19  
20 329 a longer reproductive period duration and P wave parameters, which would explain our findings  
21  
22 330 of effect modification by hormone therapy use. An earlier age at menarche (which would be  
23  
24 331 related to increased reproductive period duration) has been associated with increased  
25  
26 332 adiposity(25) and diabetes,(26) which in turn have been linked with increased p wave  
27  
28 333 duration(2) and, in the case of body mass index, with increased left atrial remodeling(27) and  
29  
30  
31 334 thus may also partially underlie our findings.  
32  
33  
34  
35  
36  
37

### 336 *Reproductive duration and decrease ventricular repolarization time*

38  
39  
40 337 The QTc is shortened by the action of progesterone and lengthened by estrogen during normal  
41  
42 338 menstrual cycling. The net effect of these changes during a single menstrual cycle can result in  
43  
44 339 shortening of ventricular repolarization time or QTc.(28) Our finding that an increased  
45  
46 340 reproductive duration was modestly inversely related to QTc in WHI. Underlying these findings  
47  
48 341 may be that increasing exposure to progesterone, in particular during menstrual cycling, may  
49  
50 342 have cumulative and measurable effects on the mid-life electrocardiogram in women.  
51  
52  
53

54 343  
55  
56  
57  
58  
59  
60

1  
2  
3 344 *Strength and Limitations*  
4

5 345 The use of a well characterized multiethnic, large dataset of postmenopausal women  
6  
7 346 representative of women in the United States is a strength of our study. A notable limitation is  
8  
9  
10 347 potential recall bias since the exposure variables were acquired retrospectively and some are very  
11  
12 348 distant events (eg age at menarche occurred 40-70 years in the past). We were unable to adjust  
13  
14 349 for pregnancy complications such as preeclampsia or gestational diabetes since these were not  
15  
16 350 collected. We did not adjust for smoking, physical activity, and habitual consumption of alcohol  
17  
18 351 and coffee which may have been related to the exposure variables but are not widely known to  
19  
20 352 be related to the ECG dependent variables studied. We studied number of pregnancies in a  
21  
22 353 categorical fashion and were unable, due to data constraints, to look at number of pregnancies as  
23  
24 354 a continuous variables.  
25  
26  
27  
28  
29

30 355

31 356 *Directions for future research:*  
32

33 357 Future studies that disentangle specific hormonal and molecular mechanisms that underlie the  
34  
35 358 association demonstrated in our study will help us better understand our study findings.  
36  
37 359 Understanding which specific fertility factors alter electrical remodeling in women is an  
38  
39 360 important direction for future research.  
40  
41

42 361

43  
44 362 *Conclusions*  
45

46  
47 363 We found that having five or more pregnancies compared to none is related to small but  
48  
49 364 significant changes in atrial conduction time and ventricular repolarization time. A longer  
50  
51 365 reproductive period duration in women not exposed to exogenous hormone therapy is related to a  
52  
53 366 modest increase in atrial conduction time and to a modest decrease in ventricular repolarization.  
54  
55  
56  
57  
58  
59  
60

1  
2  
3 367 Reproductive health factors reflective of endogenous sex hormone exposure may be significant  
4  
5 368 determinants of cardiac electrical remodeling in mid-life.  
6  
7

8 369

9  
10 370 *Disclosures*

11  
12 371 None

13  
14 372

15  
16 373 *Author contributorship statement:*

17  
18 374 Nisha I. Parikh conceived of the idea, designed the study, interpreted the analysis, drafted and  
19 375 critically reviewed the manuscript. She provided final approval of the manuscript

20  
21 376 Kristopher Kappahn and Haley Hedlin conducted study design, statistical analysis and critical  
22 377 review of the manuscript. They provided final approval of the manuscript

23  
24 378 Jeffrey E. Olgin, Matthew A. Allison, Jared W. Magnani, MSc, Kelli R. Ryckman, Molly E.  
25 379 Waring, Marco V. Perez assisted with study design, analysis interpretation, drafting and critical  
26 380 reviewed the manuscript. They provided final approval of the manuscript

27  
28 381 Barbara V. Howard assisted with study design, interpreted the analysis, drafted and critically  
29 382 reviewed the manuscript. They provided final approval of the manuscript

30  
31 383 *Data sharing statement:*

32  
33 384 This was a secondary analysis of preexisting data and as such, no new data was generated by this  
34 385 study. Information about data sharing for the Women's Health Initiative can be found at the  
35 386 following website: <https://www.whi.org/researchers/data/Pages/Home.aspx>

36  
37 387

## 38 388 **References**

39 389 1. Cheng S, Keyes MJ, Larson MG, McCabe EL, Newton-Cheh C, Levy D, et al. Long-term  
40 390 outcomes in individuals with prolonged PR interval or first-degree atrioventricular block. JAMA  
41 391 : the journal of the American Medical Association. 2009;301(24):2571-7.

42 392 2. Magnani JW, Williamson MA, Ellinor PT, Monahan KM, Benjamin EJ. P wave indices:  
43 393 current status and future directions in epidemiology, clinical, and research applications.  
44 394 Circulation Arrhythmia and electrophysiology. 2009 Feb;2(1):72-9. PubMed PMID: 19808445.  
45 395 Pubmed Central PMCID: PMC2760837. Epub 2009/10/08. eng.

46 396 3. Cuspidi C, Rescaldani M, Sala C. Prevalence of echocardiographic left-atrial enlargement  
47 397 in hypertension: a systematic review of recent clinical studies. American journal of hypertension.  
48 398 2013 Apr;26(4):456-64. PubMed PMID: 23388831. Epub 2013/02/08. eng.



- 1  
2  
3 399 4. Yaghi S, Moon YP, Mora-McLaughlin C, Willey JZ, Cheung K, Di Tullio MR, et al. Left  
4 400 atrial enlargement and stroke recurrence: the northern Manhattan stroke study. *Stroke; a journal*  
5 401 *of cerebral circulation*. 2015 Jun;46(6):1488-93. PubMed PMID: 25908460. Pubmed Central  
6 402 PMCID: PMC4442058. Epub 2015/04/25. eng.
- 7  
8 403 5. Pérez-Riera AR, de Abreu LC, Barbosa-Barros R, Grindler J, Fernandes-Cardoso A,  
9 404 Baranchuk A. P-wave dispersion: an update. *Indian Pacing and Electrophysiology Journal*. 2016  
10 405 Jul-Aug  
11 406 10/20  
12 407 08/29/received  
13 408 10/20/accepted;16(4):126-33. PubMed PMID: PMC5197451.
- 14 409 6. Baumert M, Seeck A, Faber R, Nalivaiko E, Voss A. Longitudinal changes in QT interval  
15 410 variability and rate adaptation in pregnancies with normal and abnormal uterine perfusion.  
16 411 *Hypertens Res*. 2010;33(6):555-60.
- 17 412 7. Lechmanova M, Kittnar O, Mlcek M, Slavicek J, Dohnalova A, Havranek S, et al. QT  
18 413 dispersion and T-loop morphology in late pregnancy and after delivery. *Physiological research /*  
19 414 *Academia Scientiarum Bohemoslovaca*. 2002;51(2):121-9.
- 20 415 8. Burchfield JS, Xie M, Hill JA. Pathological ventricular remodeling: mechanisms: part 1  
21 416 of 2. *Circulation*. 2013 Jul 23;128(4):388-400. PubMed PMID: 23877061. Pubmed Central  
22 417 PMCID: PMC3801217. Epub 2013/07/24. eng.
- 23 418 9. Parikh NI, Lloyd-Jones DM, Ning H, Ouyang P, Polak JF, Lima JA, et al. Association of  
24 419 number of live births with left ventricular structure and function. *The Multi-Ethnic Study of*  
25 420 *Atherosclerosis (MESA)*. *American heart journal*. 2012 Mar;163(3):470-6. PubMed PMID:  
26 421 22424019. Epub 2012/03/20. eng.
- 27 422 10. Sedlak T, Shufelt C, Iribarren C, Merz CN. Sex Hormones and the QT Interval: A  
28 423 Review. *J Womens Health*. 2012;4:4.
- 29 424 11. Kadish AH, Greenland P, Limacher MC, Frishman WH, Daugherty SA, Schwartz JB.  
30 425 Estrogen and progestin use and the QT interval in postmenopausal women. *Annals of*  
31 426 *noninvasive electrocardiology : the official journal of the International Society for Holter and*  
32 427 *Noninvasive Electrocardiology, Inc*. 2004;9(4):366-74.
- 33 428 12. Design of the Women's Health Initiative clinical trial and observational study. *The*  
34 429 *Women's Health Initiative Study Group*. *Controlled clinical trials*. 1998 Feb;19(1):61-109.  
35 430 PubMed PMID: 9492970. Epub 1998/03/11. eng.
- 36 431 13. Hays J, Hunt JR, Hubbell FA, Anderson GL, Limacher M, Allen C, et al. The Women's  
37 432 Health Initiative recruitment methods and results. *Annals of epidemiology*. 2003 Oct;13(9  
38 433 Suppl):S18-77. PubMed PMID: 14575939. Epub 2003/10/25. eng.
- 39 434 14. Rossouw JE, Anderson GL, Prentice RL, LaCroix AZ, Kooperberg C, Stefanick ML, et  
40 435 al. Risks and benefits of estrogen plus progestin in healthy postmenopausal women: principal  
41 436 results From the Women's Health Initiative randomized controlled trial. *JAMA: The Journal of*  
42 437 *the American Medical Association*. 2002 07/17;288(3):321-33. PubMed PMID: 507.
- 43 438 15. Chobanian AV, Bakris GL, Black HR, Cushman WC, Green LA, Izzo JL, Jr., et al. The  
44 439 Seventh Report of the Joint National Committee on Prevention, Detection, Evaluation, and  
45 440 Treatment of High Blood Pressure: the JNC 7 report. *JAMA: The Journal of the American*  
46 441 *Medical Association*. 2003 05/21;289(19):2560-72. PubMed PMID: 51.
- 47 442 16. Rautaharju PM, Kooperberg C, Larson JC, LaCroix A. Electrocardiographic  
48 443 abnormalities that predict coronary heart disease events and mortality in postmenopausal  
49  
50  
51  
52  
53  
54  
55  
56  
57  
58  
59  
60



- 1  
2  
3 444 women: the Women's Health Initiative. *Circulation*. 2006 Jan 31;113(4):473-80. PubMed PMID:  
4 445 16449726. Epub 2006/02/02. eng.
- 5 446 17. Bobrow KL, Quigley MA, Green J, Reeves GK, Beral V. Persistent effects of women's  
6 447 parity and breastfeeding patterns on their body mass index: results from the Million Women  
7 448 Study. *International journal of obesity* (2005). 2013 May;37(5):712-7. PubMed PMID:  
8 449 22777544. Pubmed Central PMCID: PMC3647235. Epub 2012/07/11. eng.
- 9 450 18. Vaidya D, Bennett WL, Sibley CT, Polak JF, Herrington DM, Ouyang P. Association of  
10 451 parity with carotid diameter and distensibility: multi-ethnic study of atherosclerosis.  
11 452 Hypertension. 2014 Aug;64(2):253-8. PubMed PMID: 24842921. Pubmed Central PMCID:  
12 453 PMC4184976. Epub 2014/05/21. eng.
- 13 454 19. Giubertoni E, Bertelli L, Bartolacelli Y, Origliani G, Modena MG. Parity as predictor of  
14 455 early hypertension during menopausal transition. *Journal of hypertension*. 2013 Mar;31(3):501-  
15 456 7; discussion 7. PubMed PMID: 23196900. Epub 2012/12/01. eng.
- 16 457 20. Magnani JW, Johnson VM, Sullivan LM, Lubitz SA, Schnabel RB, Ellinor PT, et al. P-  
17 458 wave indices: derivation of reference values from the Framingham Heart Study. *Annals of*  
18 459 *noninvasive electrocardiology* : the official journal of the International Society for Holter and  
19 460 *Noninvasive Electrocardiology, Inc.* 2010 Oct;15(4):344-52. PubMed PMID: 20946557. Pubmed  
20 461 Central PMCID: PMC3394095. Epub 2010/10/16. eng.
- 21 462 21. Simmons LA, Gillin AG, Jeremy RW. Structural and functional changes in left ventricle  
22 463 during normotensive and preeclamptic pregnancy. *American journal of physiology Heart and*  
23 464 *circulatory physiology*. 2002 Oct;283(4):H1627-33. PubMed PMID: 12234817. Epub  
24 465 2002/09/18. eng.
- 25 466 22. Ouzounian JG, Elkayam U. Physiologic changes during normal pregnancy and delivery.  
26 467 *Cardiology clinics*. 2012 Aug;30(3):317-29. PubMed PMID: 22813360. Epub 2012/07/21. eng.
- 27 468 23. Ozmen N, Cebeci BS, Yiginer O, Muhcu M, Kardesoglu E, Dincturk M. P-wave  
28 469 dispersion is increased in pregnancy due to shortening of minimum duration of P: does this have  
29 470 clinical significance? *The Journal of international medical research*. 2006 Sep-Oct;34(5):468-74.  
30 471 PubMed PMID: 17133775. Epub 2006/12/01. eng.
- 31 472 24. Karabag T, Hanci V, Aydin M, Dogan SM, Turan IO, Yildirim N, et al. Influence of  
32 473 menstrual cycle on p wave dispersion. *International heart journal*. 2011;52(1):23-6. PubMed  
33 474 PMID: 21321464. Epub 2011/02/16. eng.
- 34 475 25. Mueller NT, Pereira MA, Demerath EW, Dreyfus JG, MacLehose RF, Carr JJ, et al.  
35 476 Earlier menarche is associated with fatty liver and abdominal ectopic fat in midlife, independent  
36 477 of young adult BMI: The CARDIA study. *Obesity (Silver Spring, Md)*. 2015 Feb;23(2):468-74.  
37 478 PubMed PMID: 25521620. Pubmed Central PMCID: PMC4310794. Epub 2014/12/19. eng.
- 38 479 26. Janghorbani M, Mansourian M, Hosseini E. Systematic review and meta-analysis of age  
39 480 at menarche and risk of type 2 diabetes. *Acta diabetologica*. 2014 Aug;51(4):519-28. PubMed  
40 481 PMID: 24671509. Epub 2014/03/29. eng.
- 41 482 27. McManus DD, Xanthakis V, Sullivan LM, Zachariah J, Aragam J, Larson MG, et al.  
42 483 Longitudinal tracking of left atrial diameter over the adult life course: Clinical correlates in the  
43 484 community. *Circulation*. 2010 Feb 9;121(5):667-74. PubMed PMID: 20100973. Pubmed Central  
44 485 PMCID: PMC2823068. Epub 2010/01/27. eng.
- 45 486 28. Sedlak T, Shufelt C, Iribarren C, Merz CN. Sex hormones and the QT interval: a review.  
46 487 *Journal of women's health* (2002). 2012 Sep;21(9):933-41. PubMed PMID: 22663191. Pubmed  
47 488 Central PMCID: PMC3430484. Epub 2012/06/06. eng.
- 48  
49  
50  
51  
52  
53  
54  
55 489

1  
2  
3  
4  
5  
6  
7  
8  
9  
10  
11  
12  
13  
14  
15  
16  
17  
18  
19  
20  
21  
22  
23  
24  
25  
26  
27  
28  
29  
30  
31  
32  
33  
34  
35  
36  
37  
38  
39  
40  
41  
42  
43  
44  
45  
46  
47  
48  
49  
50  
51  
52  
53  
54  
55  
56  
57  
58  
59  
60

490

491

For peer review only

1  
2  
3 492 **Figure Legend: Creation of the Study Sample.** Clinical Trials include Hormone Trial, Dietary  
4  
5 493 Modification and Calcium/Vitamin D. ECG=electrocardiogram, CVD=Cardiovascular diseases.  
6  
7 494  
8  
9  
10  
11  
12  
13  
14  
15  
16  
17  
18  
19  
20  
21  
22  
23  
24  
25  
26  
27  
28  
29  
30  
31  
32  
33  
34  
35  
36  
37  
38  
39  
40  
41  
42  
43  
44  
45  
46  
47  
48  
49  
50  
51  
52  
53  
54  
55  
56  
57  
58  
59  
60

For peer review only

495 **Table 1: Baseline Characteristics of the Study Sample- Analytic and Excluded**

| <b>Distribution of Covariates by Number of Live Births</b> | <b>Never pregnant</b> | <b>None</b>   | <b>1</b>       | <b>2-4</b>      | <b>5+</b>      | <b>Analytic</b> | <b>Excluded</b> |
|------------------------------------------------------------|-----------------------|---------------|----------------|-----------------|----------------|-----------------|-----------------|
| <b>Sample Size</b>                                         | 3296                  | 1082          | 3536           | 26599           | 6174           | 40687           | 6685            |
| <b>Age, N (%)</b>                                          |                       |               |                |                 |                |                 |                 |
| <b>50 to 54</b>                                            | 598<br>(18.1)         | 265<br>(24.5) | 745<br>(21.1)  | 3718<br>(14)    | 329<br>(5.3)   | 5655<br>(13.9)  | 834<br>(12.5)   |
| <b>55 to 59</b>                                            | 768<br>(23.3)         | 295<br>(27.3) | 869<br>(24.6)  | 6282<br>(23.6)  | 1054<br>(17.1) | 9268<br>(22.8)  | 1204 (18)       |
| <b>60 to 69</b>                                            | 1323<br>(40.1)        | 371<br>(34.3) | 1363<br>(38.5) | 12189<br>(45.8) | 3580<br>(58)   | 18826<br>(46.3) | 3146<br>(47.1)  |
| <b>70 to 79</b>                                            | 607<br>(18.4)         | 151<br>(14)   | 559<br>(15.8)  | 4410<br>(16.6)  | 1211<br>(19.6) | 6938<br>(17.1)  | 1501<br>(22.5)  |
| <b>MISSING</b>                                             | 0 (0)                 | 0 (0)         | 0 (0)          | 0 (0)           | 0 (0)          | 0 (0)           | 0 (0)           |
| <b>Race/Ethnicity, N (%)</b>                               |                       |               |                |                 |                |                 |                 |
| <b>American Indian/Alaskan Native</b>                      | 3 (0.1)               | 3 (0.3)       | 13<br>(0.4)    | 96 (0.4)        | 32 (0.5)       | 147<br>(0.4)    | 39 (0.6)        |
| <b>Asian/PI</b>                                            | 121 (3.7)             | 33 (3)        | 102<br>(2.9)   | 728<br>(2.7)    | 106<br>(1.7)   | 1090<br>(2.7)   | 143 (2.1)       |
| <b>African-American</b>                                    | 263 (8)               | 203<br>(18.8) | 604<br>(17.1)  | 2126<br>(8)     | 598<br>(9.7)   | 3794<br>(9.3)   | 1017<br>(15.2)  |
| <b>Hispanic</b>                                            | 106 (3.2)             | 50<br>(4.6)   | 160<br>(4.5)   | 1005<br>(3.8)   | 300<br>(4.9)   | 1621 (4)        | 471 (7)         |
| <b>White</b>                                               | 2767<br>(84)          | 780<br>(72.1) | 2601<br>(73.6) | 22352<br>(84)   | 5056<br>(81.9) | 33556<br>(82.5) | 4808<br>(71.9)  |
| <b>Other</b>                                               | 36 (1.1)              | 13<br>(1.2)   | 56<br>(1.6)    | 292<br>(1.1)    | 82 (1.3)       | 479<br>(1.2)    | 98 (1.5)        |
| <b>MISSING</b>                                             | 0 (0)                 | 0 (0)         | 0 (0)          | 0 (0)           | 0 (0)          | 0 (0)           | 109 (1.6)       |
| <b>Education Level, N (%)</b>                              |                       |               |                |                 |                |                 |                 |
| <b>No high school diploma</b>                              | 73 (2.2)              | 41<br>(3.8)   | 157<br>(4.4)   | 1033<br>(3.9)   | 543<br>(8.8)   | 1847<br>(4.5)   | 644 (9.6)       |
| <b>High school diploma</b>                                 | 1352<br>(41)          | 490<br>(45.3) | 1872<br>(52.9) | 15726<br>(59.1) | 4096<br>(66.3) | 23536<br>(57.8) | 3752<br>(56.1)  |
| <b>Bachelor's degree</b>                                   | 802<br>(24.3)         | 250<br>(23.1) | 801<br>(22.7)  | 5859<br>(22)    | 1087<br>(17.6) | 8799<br>(21.6)  | 1171<br>(17.5)  |
| <b>Graduate degree</b>                                     | 1069<br>(32.4)        | 301<br>(27.8) | 706<br>(20)    | 3981<br>(15)    | 448<br>(7.3)   | 6505<br>(16)    | 789<br>(11.8)   |
| <b>MISSING</b>                                             | 0 (0)                 | 0 (0)         | 0 (0)          | 0 (0)           | 0 (0)          | 0 (0)           | 329 (4.9)       |
| <b>Household Income, N (%)</b>                             |                       |               |                |                 |                |                 |                 |

|                                                 |                |                |                |                 |                |                 |                |
|-------------------------------------------------|----------------|----------------|----------------|-----------------|----------------|-----------------|----------------|
| <b>&lt;\$50,000</b>                             | 2071<br>(62.8) | 639<br>(59.1)  | 2136<br>(60.4) | 15872<br>(59.7) | 4543<br>(73.6) | 25261<br>(62.1) | 2809 (42)      |
| <b>\$50 to 100,000</b>                          | 974<br>(29.6)  | 333<br>(30.8)  | 1090<br>(30.8) | 8260<br>(31.1)  | 1330<br>(21.5) | 11987<br>(29.5) | 874<br>(13.1)  |
| <b>&gt;\$100,000</b>                            | 251 (7.6)      | 110<br>(10.2)  | 310<br>(8.8)   | 2467<br>(9.3)   | 301<br>(4.9)   | 3439<br>(8.5)   | 208 (3.1)      |
| <b>MISSING</b>                                  | 0 (0)          | 0 (0)          | 0 (0)          | 0 (0)           | 0 (0)          | 0 (0)           | 2794<br>(41.8) |
| <b>Region, N (%)</b>                            |                |                |                |                 |                |                 |                |
| <b>Northeast</b>                                | 763<br>(23.1)  | 202<br>(18.7)  | 694<br>(19.6)  | 5830<br>(21.9)  | 1554<br>(25.2) | 9043<br>(22.2)  | 1484<br>(22.2) |
| <b>Midwest</b>                                  | 719<br>(21.8)  | 192<br>(17.7)  | 709<br>(20.1)  | 5793<br>(21.8)  | 1792<br>(29)   | 9205<br>(22.6)  | 1422<br>(21.3) |
| <b>South</b>                                    | 778<br>(23.6)  | 321<br>(29.7)  | 1012<br>(28.6) | 6559<br>(24.7)  | 1205<br>(19.5) | 9875<br>(24.3)  | 2081<br>(31.1) |
| <b>West</b>                                     | 1036<br>(31.4) | 367<br>(33.9)  | 1121<br>(31.7) | 8417<br>(31.6)  | 1623<br>(26.3) | 12564<br>(30.9) | 1698<br>(25.4) |
| <b>MISSING</b>                                  | 0 (0)          | 0 (0)          | 0 (0)          | 0 (0)           | 0 (0)          | 0 (0)           | 0 (0)          |
| <b>BMI, N (%)</b>                               |                |                |                |                 |                |                 |                |
| <b>Underweight<br/>(<math>&lt; 18.5</math>)</b> | 34 (1)         | 8 (0.7)        | 26<br>(0.7)    | 103<br>(0.4)    | 15 (0.2)       | 186<br>(0.5)    | 25 (0.4)       |
| <b>Normal (18.5 -<br/>24.9)</b>                 | 1001<br>(30.4) | 309<br>(28.6)  | 1041<br>(29.4) | 7557<br>(28.4)  | 1341<br>(21.7) | 11249<br>(27.6) | 1582<br>(23.7) |
| <b>Overweight<br/>(25.0 - 29.9)</b>             | 1118<br>(33.9) | 377<br>(34.8)  | 1234<br>(34.9) | 9660<br>(36.3)  | 2262<br>(36.6) | 14651<br>(36)   | 2262<br>(33.8) |
| <b>Obese (30+)</b>                              | 1143<br>(34.7) | 388<br>(35.9)  | 1235<br>(34.9) | 9279<br>(34.9)  | 2556<br>(41.4) | 14601<br>(35.9) | 2579<br>(38.6) |
| <b>MISSING</b>                                  | 0 (0)          | 0 (0)          | 0 (0)          | 0 (0)           | 0 (0)          | 0 (0)           | 237 (3.5)      |
| <b>Hypertension,<br/>N (%)</b>                  |                |                |                |                 |                |                 |                |
| <b>Never<br/>hypertensive</b>                   | 2308<br>(70)   | 742<br>(68.6)  | 2439<br>(69)   | 18413<br>(69.2) | 4045<br>(65.5) | 27947<br>(68.7) | 4236<br>(63.4) |
| <b>Treated<br/>hypertensive</b>                 | 712<br>(21.6)  | 240<br>(22.2)  | 819<br>(23.2)  | 6141<br>(23.1)  | 1638<br>(26.5) | 9550<br>(23.5)  | 1684<br>(25.2) |
| <b>Untreated<br/>hypertensive</b>               | 276 (8.4)      | 100<br>(9.2)   | 278<br>(7.9)   | 2045<br>(7.7)   | 491 (8)        | 3190<br>(7.8)   | 516 (7.7)      |
| <b>MISSING</b>                                  | 0 (0)          | 0 (0)          | 0 (0)          | 0 (0)           | 0 (0)          | 0 (0)           | 249 (3.7)      |
| <b>History of<br/>Diabetes, N<br/>(%)</b>       |                |                |                |                 |                |                 |                |
| <b>Yes</b>                                      | 150 (4.6)      | 57<br>(5.3)    | 179<br>(5.1)   | 1377<br>(5.2)   | 434 (7)        | 2197<br>(5.4)   | 459 (6.9)      |
| <b>No</b>                                       | 3146<br>(95.4) | 1025<br>(94.7) | 3357<br>(94.9) | 25222<br>(94.8) | 5740<br>(93)   | 38490<br>(94.6) | 6217 (93)      |
| <b>MISSING</b>                                  | 0 (0)          | 0 (0)          | 0 (0)          | 0 (0)           | 0 (0)          | 0 (0)           | 9 (0.1)        |

|                                            |                |               |               |               |                |                |                |
|--------------------------------------------|----------------|---------------|---------------|---------------|----------------|----------------|----------------|
| <b>History of Breastfeeding, N (%)</b>     |                |               |               |               |                |                |                |
| <b>Yes</b>                                 | 6 (0.2)        | 36 (3.3)      | 1476 (41.7)   | 15375 (57.8)  | 4258 (69)      | 21151 (52)     | 3309 (49.5)    |
| <b>No</b>                                  | 3290 (99.8)    | 1046 (96.7)   | 2060 (58.3)   | 11224 (42.2)  | 1916 (31)      | 19536 (48)     | 2942 (44)      |
| <b>MISSING</b>                             | 0 (0)          | 0 (0)         | 0 (0)         | 0 (0)         | 0 (0)          | 0 (0)          | 434 (6.5)      |
| <b>History of Oophorectomy, N (%)</b>      |                |               |               |               |                |                |                |
| <b>No</b>                                  | 2253 (68.4)    | 711 (65.7)    | 2462 (69.6)   | 19371 (72.8)  | 4704 (76.2)    | 29501 (72.5)   | 4404 (65.9)    |
| <b>Yes, part of an ovary was taken out</b> | 32 (1)         | 20 (1.8)      | 42 (1.2)      | 225 (0.8)     | 41 (0.7)       | 360 (0.9)      | 85 (1.3)       |
| <b>Yes, one was taken out</b>              | 203 (6.2)      | 127 (11.7)    | 285 (8.1)     | 1718 (6.5)    | 356 (5.8)      | 2689 (6.6)     | 645 (9.6)      |
| <b>Yes, both were taken out</b>            | 782 (23.7)     | 207 (19.1)    | 716 (20.2)    | 5082 (19.1)   | 1019 (16.5)    | 7806 (19.2)    | 759 (11.4)     |
| <b>Yes, unknown number taken out</b>       | 26 (0.8)       | 17 (1.6)      | 31 (0.9)      | 203 (0.8)     | 54 (0.9)       | 331 (0.8)      | 159 (2.4)      |
| <b>MISSING</b>                             | 0 (0)          | 0 (0)         | 0 (0)         | 0 (0)         | 0 (0)          | 0 (0)          | 633 (9.5)      |
| <b>History of HT, N (%)</b>                |                |               |               |               |                |                |                |
| <b>Never used</b>                          | 1520 (46.1)    | 478 (44.2)    | 1601 (45.3)   | 11660 (43.8)  | 3324 (53.8)    | 18583 (45.7)   | 4372 (65.4)    |
| <b>Past user</b>                           | 561 (17)       | 191 (17.7)    | 575 (16.3)    | 4780 (18)     | 1147 (18.6)    | 7254 (17.8)    | 821 (12.3)     |
| <b>Current user</b>                        | 1215 (36.9)    | 413 (38.2)    | 1360 (38.5)   | 10159 (38.2)  | 1703 (27.6)    | 14850 (36.5)   | 1450 (21.7)    |
| <b>MISSING</b>                             | 0 (0)          | 0 (0)         | 0 (0)         | 0 (0)         | 0 (0)          | 0 (0)          | 42 (0.6)       |
| <b>Age (y), Mean (SD)</b>                  | 61.95 (7.43)   | 60.4 (7.36)   | 61.14 (7.32)  | 62.23 (6.87)  | 64.14 (5.97)   | 62.36 (6.9)    | 63.46 (7.16)   |
| <b>Missing (%)</b>                         | 0              | 0             | 0             | 0             | 0              | 0              | 0              |
| <b>BMI, Median (IQR)</b>                   | 27.39 (7.72)   | 27.74 (8.02)  | 27.69 (7.56)  | 27.73 (7.34)  | 28.78 (7.45)   | 27.85 (7.46)   | 28.39 (7.86)   |
| <b>Missing (%)</b>                         | 0              | 0             | 0             | 0             | 0              | 0              | 3.55           |
| <b>QTc wave duration (ms), Mean (SD)</b>   | 417.95 (18.38) | 418.49 (19.6) | 418.24 (19.2) | 418.58 (18.7) | 420.34 (19.33) | 418.76 (18.85) | 419.82 (19.84) |
| <b>Missing (%)</b>                         | 0              | 0             | 0             | 0             | 0              | 0              | 0              |
| <b>PR wave dispersion</b>                  | 63.86 (19.42)  | 64.43 (19.43) | 64.51 (19.43) | 64.79 (19.57) | 65.77 (19.57)  | 64.83 (19.55)  | 64.87 (20.56)  |

|                                                          |                |                |                |                |                |                |                |
|----------------------------------------------------------|----------------|----------------|----------------|----------------|----------------|----------------|----------------|
| <b>(ms), Mean (SD)</b>                                   |                |                |                |                |                |                |                |
| <b>Missing (%)</b>                                       | 0              | 0              | 0              | 0              | 0              | 0              | 0              |
| <b>PR interval duration (ms), Median (IQR)</b>           | 156 (30)       | 158 (28)       | 158 (30)       | 158 (30)       | 160 (30)       | 158 (30)       | 158 (30)       |
| <b>Missing (%)</b>                                       | 0              | 0              | 0              | 0              | 0              | 0              | 0              |
| <b>P wave duration (ms), Mean (SD)</b>                   | 106.81 (12.85) | 107.13 (12.33) | 106.96 (12.18) | 106.88 (12.34) | 107.93 (12.44) | 107.05 (12.39) | 106.61 (16.09) |
| <b>Missing (%)</b>                                       | 0              | 0              | 0              | 0              | 0              | 0              | 0              |
| <b>Age at menopause (y), Median (IQR)</b>                | 48 (8)         | 49 (7)         | 49 (8)         | 50 (7)         | 50 (8)         | 50 (7)         | 49 (7)         |
| <b>Missing (%)</b>                                       | 0              | 0              | 0              | 0              | 0              | 0              | 32.3           |
| <b>Age at menarche (y), Mean (SD)</b>                    | 12.54 (1.48)   | 12.55 (1.57)   | 12.58 (1.54)   | 12.58 (1.47)   | 12.67 (1.46)   | 12.59 (1.48)   | 12.65 (1.53)   |
| <b>Missing (%)</b>                                       | 0              | 0              | 0              | 0              | 0              | 0              | 1.78           |
| <b>Duration of reproductive period (y), Median (IQR)</b> | 36 (8)         | 36 (8)         | 36 (8)         | 37 (8)         | 37 (7)         | 37 (8)         | 36 (8)         |
| <b>Missing (%)</b>                                       | 0              | 0              | 0              | 0              | 0              | 0              | 33.63          |

496

497 HT=Hormone Therapy (or hormone replacement therapy)

498

499 **Table 1: Unadjusted and multivariable-adjusted association of number of pregnancies**  
 500 **leading to livebirths and reproductive period duration with PR interval (ms) in N=40,687**  
 501 **women in the Womens Health Initiative Clinical Trials**

|                                                                                                                    | <b>Unadjusted<br/>Effect<br/>(95% CI)</b> | <b>Multivariable<br/>Adjusted<br/>Effect*<br/>(95% CI)</b> |                                 |
|--------------------------------------------------------------------------------------------------------------------|-------------------------------------------|------------------------------------------------------------|---------------------------------|
| <b>Number of live births and reproductive period duration are each in their own separate multivariable models.</b> |                                           |                                                            |                                 |
| Number of Live Births<br>( <i>categorical with never pregnant as referent category</i> )                           |                                           |                                                            | p value for linear trend= 0.11  |
| Never Pregnant                                                                                                     | Ref.                                      | Ref.                                                       |                                 |
| None                                                                                                               | 1.44<br>(-0.18,3.06)                      | 1.15<br>(-0.43, 2.74)                                      |                                 |
| 1                                                                                                                  | 1.16<br>(0.04,2.28)                       | 0.54<br>(-0.57, 1.66)                                      |                                 |
| 2-4                                                                                                                | 1.20<br>(0.34,2.05)                       | 0.59<br>(-0.301, 1.48)                                     |                                 |
| 5+                                                                                                                 | 3.06<br>(2.07,4.06)                       | 1.32<br>(0.25, 2.39)                                       |                                 |
| Reproductive period duration ( <i>continuous, years</i> )                                                          |                                           |                                                            | p value for interaction = 0.009 |
| Never HT User                                                                                                      | 0.05<br>(-0.01, 0.11)                     | 0.10<br>(0.04, 0.16)                                       |                                 |
| Past HT use                                                                                                        | 0.002<br>(-0.07, 0.08)                    | 0.08<br>(-0.00,0.15)                                       |                                 |
| Current HT use                                                                                                     | -0.09<br>(-0.15, -0.03)                   | -0.02<br>(-0.08, 0.04)                                     |                                 |

502 \*Covariates include age, baseline BMI, baseline hypertension status, history of diabetes, income,  
 503 education, race/ethnicity, region, history/ duration of breastfeeding, lipid medication,  
 504 oophorectomy status, hysterectomy status, hormone use history, heart rate and QRS duration  
 505 HT=hormone therapy  
 506

507

508

509

510



511 **Table 3: Unadjusted and multivariable-adjusted association of number of pregnancies**  
 512 **leading to livebirths and reproductive period duration with QTc interval (ms) in N=40,687**  
 513 **women in the Womens Health Initiative and Clinical Trials**

|                                                                                                          | <b>Unadjusted<br/>Effect<br/>(95% CI)</b> | <b>Multivariable<br/>Adjusted<br/>Effect*<br/>(95% CI)</b> | <b>P value</b>                 |
|----------------------------------------------------------------------------------------------------------|-------------------------------------------|------------------------------------------------------------|--------------------------------|
| <b>Number of live births and reproductive period duration are each in their own multivariable models</b> |                                           |                                                            |                                |
| Number of Live Births<br>( <i>categorical with never pregnant as referent category</i> )                 |                                           |                                                            | p value for linear trend=0.008 |
| Never Pregnant                                                                                           | Ref.                                      | Ref.                                                       |                                |
| None                                                                                                     | 0.54<br>(-0.76,1.83)                      | 0.66<br>(-0.56, 1.88)                                      |                                |
| 1                                                                                                        | 0.29<br>(-0.60,1.18)                      | 0.15<br>(-0.71, 1.02)                                      |                                |
| 2-4                                                                                                      | 0.63<br>(-0.05,1.31)                      | 0.25<br>(-0.43, 0.94)                                      |                                |
| 5+                                                                                                       | 2.39<br>(1.59,3.19)                       | 1.15<br>(0.33, 1.98)                                       |                                |
| Reproductive period duration<br>( <i>continuous, years</i> )                                             | -0.09<br>(-0.12,-0.06)                    | -0.04<br>(-0.07, -0.01)                                    | p value=0.01                   |

514 \*Covariates for number of livebirths analysis include age, baseline BMI, baseline hypertension  
 515 status, history of diabetes, income, education, race/ethnicity, region, history/ duration of  
 516 breastfeeding, lipid medication, oophorectomy status, hysterectomy status, hormone use history,  
 517 heart rate and QRS duration. Covariates for reproductive period duration analysis include live  
 518 births, age, baseline BMI, baseline hypertension status, history of diabetes, income, education,  
 519 race/ethnicity, region, history of breastfeeding, duration of breastfeeding, lipid medication,  
 520 oophorectomy status, hysterectomy status, hormone use history, and QRS duration.  
 521 HT=hormone therapy  
 522

523 **Table 4: Unadjusted and multivariable-adjusted associations between number of**  
 524 **pregnancies leading to livebirths with p wave duration and p wave dispersion in N=39,338\***  
 525 **women in the Women's Health Initiative and Clinical Trials**

| Dependent Variable            | Number of Live Births | Unadjusted Effect (95% CI) | Adjusted Effect (95% CI) | p-value                        |
|-------------------------------|-----------------------|----------------------------|--------------------------|--------------------------------|
| <b>P wave duration (ms)</b>   | Never Pregnant        | Ref.                       | Ref.                     | p value for linear trend =0.73 |
|                               | None                  | 0.09<br>(-0.73, 0.92)      | 0.09<br>(-0.69, 0.87)    |                                |
|                               | 1                     | -0.06<br>(-0.63, 0.51)     | -0.20<br>(-0.76, 0.35)   |                                |
|                               | 2-4                   | -0.03<br>(-0.47, 0.40)     | -0.26<br>(-0.70, 0.18)   |                                |
|                               | 5+                    | 0.99<br>(0.49, 1.50)       | -0.22<br>(-0.74, 0.31)   |                                |
| <b>P wave dispersion (ms)</b> | Never Pregnant        | Ref.                       | Ref.                     | p for linear trend =0.13       |
|                               | None                  | 0.67<br>(-0.42, 1.77)      | 0.64<br>(-0.45, 1.72)    |                                |
|                               | 1                     | 0.44<br>(-0.32, 1.20)      | 0.34<br>(-0.42, 1.11)    |                                |
|                               | 2-4                   | 0.72<br>(0.15, 1.30)       | 0.62<br>(0.01, 1.24)     |                                |
|                               | 5+                    | 1.49<br>(0.82, 2.17)       | 0.94<br>(0.20, 1.67)     |                                |

526 Effect estimates correspond to expected ms increase in the specified interval measure for each  
 527 parity group relative to the never pregnant group. Fully adjusted models were adjusted for age,  
 528 baseline BMI, baseline hypertension status, history of diabetes, income, education,  
 529 race/ethnicity, region, history of breastfeeding, antianxiety medication, antidepressant  
 530 medication, lipid medication, duration of breastfeeding, oophorectomy status, hysterectomy  
 531 status, hormone use history, heart rate, and QRS duration.

532 \*n differs from main analyses due to the exclusion of women with implausible PR wave  
 533 measures

534  
 535  
 536

537 **Table 5: Reproductive Duration and P wave Duration and Dispersion by hormone use**  
 538 **status. in N= 31,538\* Women in the Women's Health Initiative Clinical Trial.**

| Dependent Variable     | Hormone Use Status | Unadjusted Effect (95% CI) | Adjusted Effect (95% CI) | P value                            |
|------------------------|--------------------|----------------------------|--------------------------|------------------------------------|
| P wave duration (ms)   | Never User         | 0.07<br>(0.03, 0.11)       | 0.09<br>(0.06, 0.13)     | p value for interaction=<br>0.0009 |
|                        | Past               | -0.04<br>(-0.08, 0.005)    | 0.01<br>(-0.03, 0.05)    |                                    |
|                        | Current            | -0.03<br>(-0.06, 0.004)    | 0.01<br>(-0.02, 0.05)    |                                    |
| P wave dispersion (ms) | Never User         | 0.002<br>(-0.04, 0.05)     | 0.01<br>(-0.03, 0.06)    | p value for interaction=<br>0.65   |
|                        | Past               | -0.03<br>(-0.09, 0.02)     | -0.01<br>(-0.06, 0.05)   |                                    |
|                        | Current            | -0.04<br>(-0.08, 0.003)    | -0.02<br>(-0.06, 0.03)   |                                    |

539 Effect estimates correspond to expected ms increase in PR measure. These models contained an  
 540 interaction term for reproductive period duration hormone use status. Fully adjusted models were  
 541 adjusted for number of live births, age, baseline BMI, baseline hypertension status, history of  
 542 diabetes, income, education, race/ethnicity, region, history of breastfeeding, duration of  
 543 breastfeeding, antianxiety medication, antidepressant medication, lipid medication,  
 544 oophorectomy status, hysterectomy status, hormone use history, heart rate, and QRS duration.

545 \*n differs from main analyses due to the exclusion of women with implausible PR wave  
 546 measures

547

1  
2  
3  
4  
5  
6  
7  
8  
9  
10  
11  
12  
13  
14  
15  
16  
17  
18  
19  
20  
21  
22  
23  
24  
25  
26  
27  
28  
29  
30  
31  
32  
33  
34  
35  
36  
37  
38  
39  
40  
41  
42  
43  
44  
45  
46  
47  
48  
49  
50  
51  
52  
53  
54  
55  
56  
57  
58  
59  
60

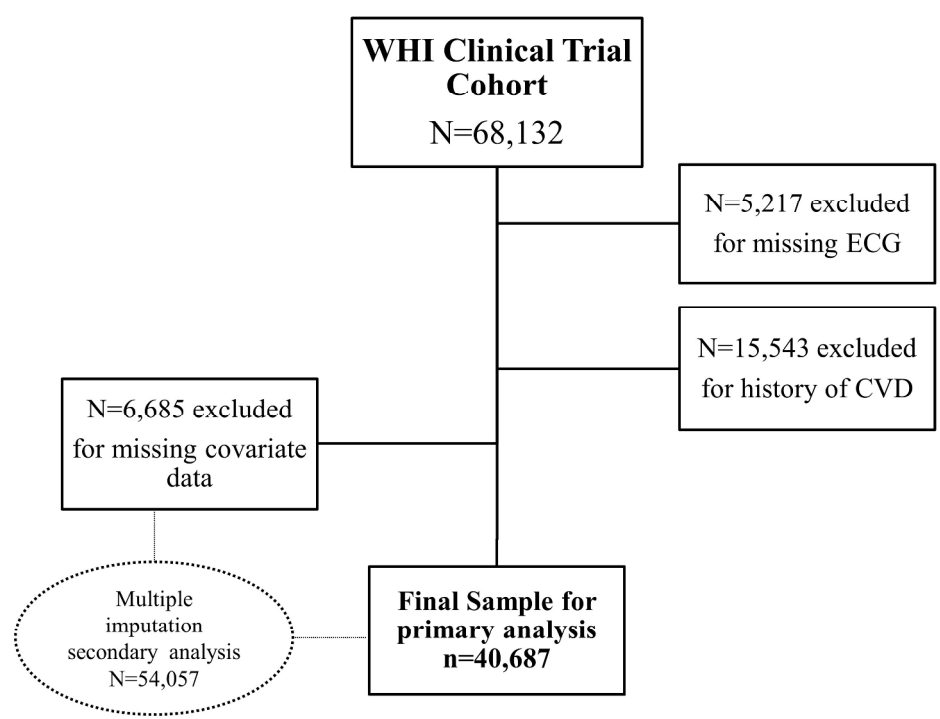

254x190mm (300 x 300 DPI)

Peer Review Only

STROBE Statement—checklist of items that should be included in reports of observational studies with page number in manuscript.

|                              | Item No | Recommendation                                                                                                                                                                                                                                                                                                                                                                                                                                                         | Page number |
|------------------------------|---------|------------------------------------------------------------------------------------------------------------------------------------------------------------------------------------------------------------------------------------------------------------------------------------------------------------------------------------------------------------------------------------------------------------------------------------------------------------------------|-------------|
| <b>Title and abstract</b>    | 1       | (a) Indicate the study's design with a commonly used term in the title or the abstract                                                                                                                                                                                                                                                                                                                                                                                 | 1           |
|                              |         | (b) Provide in the abstract an informative and balanced summary of what was done and what was found                                                                                                                                                                                                                                                                                                                                                                    | 2           |
| <b>Introduction</b>          |         |                                                                                                                                                                                                                                                                                                                                                                                                                                                                        |             |
| Background/rationale         | 2       | Explain the scientific background and rationale for the investigation being reported                                                                                                                                                                                                                                                                                                                                                                                   | 3-5         |
| Objectives                   | 3       | State specific objectives, including any prespecified hypotheses                                                                                                                                                                                                                                                                                                                                                                                                       | 5           |
| <b>Methods</b>               |         |                                                                                                                                                                                                                                                                                                                                                                                                                                                                        |             |
| Study design                 | 4       | Present key elements of study design early in the paper                                                                                                                                                                                                                                                                                                                                                                                                                | 1, 5-10     |
| Setting                      | 5       | Describe the setting, locations, and relevant dates, including periods of recruitment, exposure, follow-up, and data collection                                                                                                                                                                                                                                                                                                                                        | 5-6         |
| Participants                 | 6       | (a) <i>Cohort study</i> —Give the eligibility criteria, and the sources and methods of selection of participants. Describe methods of follow-up<br><i>Case-control study</i> —Give the eligibility criteria, and the sources and methods of case ascertainment and control selection. Give the rationale for the choice of cases and controls<br><i>Cross-sectional study</i> —Give the eligibility criteria, and the sources and methods of selection of participants | 5-6         |
|                              |         | (b) <i>Cohort study</i> —For matched studies, give matching criteria and number of exposed and unexposed<br><i>Case-control study</i> —For matched studies, give matching criteria and the number of controls per case                                                                                                                                                                                                                                                 | N/A         |
| Variables                    | 7       | Clearly define all outcomes, exposures, predictors, potential confounders, and effect modifiers. Give diagnostic criteria, if applicable                                                                                                                                                                                                                                                                                                                               | 6-7         |
| Data sources/<br>measurement | 8*      | For each variable of interest, give sources of data and details of methods of assessment (measurement). Describe comparability of assessment methods if there is more than one group                                                                                                                                                                                                                                                                                   | 6-7         |
| Bias                         | 9       | Describe any efforts to address potential sources of bias                                                                                                                                                                                                                                                                                                                                                                                                              | 8-9         |
| Study size                   | 10      | Explain how the study size was arrived at                                                                                                                                                                                                                                                                                                                                                                                                                              | 6-7         |
| Quantitative variables       | 11      | Explain how quantitative variables were handled in the analyses. If applicable, describe which groupings were chosen and why                                                                                                                                                                                                                                                                                                                                           | 8-9         |
| Statistical methods          | 12      | (a) Describe all statistical methods, including those used to control for confounding                                                                                                                                                                                                                                                                                                                                                                                  | 8-9         |
|                              |         | (b) Describe any methods used to examine subgroups and interactions                                                                                                                                                                                                                                                                                                                                                                                                    | 8-9         |
|                              |         | (c) Explain how missing data were addressed                                                                                                                                                                                                                                                                                                                                                                                                                            | 9-10        |
|                              |         | (d) <i>Cohort study</i> —If applicable, explain how loss to follow-up was addressed<br><i>Case-control study</i> —If applicable, explain how matching of cases and controls was addressed<br><i>Cross-sectional study</i> —If applicable, describe analytical methods taking account of sampling strategy                                                                                                                                                              | 5-7         |
|                              |         | (e) Describe any sensitivity analyses                                                                                                                                                                                                                                                                                                                                                                                                                                  | 9-10        |

Continued on next page

| <b>Results</b>           |     | <b>Page number</b>                                                                                                                                                                                           |            |
|--------------------------|-----|--------------------------------------------------------------------------------------------------------------------------------------------------------------------------------------------------------------|------------|
| Participants             | 13* | (a) Report numbers of individuals at each stage of study—eg numbers potentially eligible, examined for eligibility, confirmed eligible, included in the study, completing follow-up, and analysed            | 5-6        |
|                          |     | (b) Give reasons for non-participation at each stage                                                                                                                                                         | 5-6        |
|                          |     | (c) Consider use of a flow diagram                                                                                                                                                                           | 5-6, 19    |
| Descriptive data         | 14* | (a) Give characteristics of study participants (eg demographic, clinical, social) and information on exposures and potential confounders                                                                     | 5-6, 20-23 |
|                          |     | (b) Indicate number of participants with missing data for each variable of interest                                                                                                                          | 19, 20-23  |
|                          |     | (c) <i>Cohort study</i> —Summarise follow-up time (eg, average and total amount)                                                                                                                             | N/A        |
| Outcome data             | 15* | <i>Cohort study</i> —Report numbers of outcome events or summary measures over time                                                                                                                          | N/A        |
|                          |     | <i>Case-control study</i> —Report numbers in each exposure category, or summary measures of exposure                                                                                                         | N/A        |
|                          |     | <i>Cross-sectional study</i> —Report numbers of outcome events or summary measures                                                                                                                           | 5-7        |
| Main results             | 16  | (a) Give unadjusted estimates and, if applicable, confounder-adjusted estimates and their precision (eg, 95% confidence interval). Make clear which confounders were adjusted for and why they were included | 24-27      |
|                          |     | (b) Report category boundaries when continuous variables were categorized                                                                                                                                    | 20-23      |
|                          |     | (c) If relevant, consider translating estimates of relative risk into absolute risk for a meaningful time period                                                                                             | 10-11      |
| Other analyses           | 17  | Report other analyses done—eg analyses of subgroups and interactions, and sensitivity analyses                                                                                                               | 10-11      |
| <b>Discussion</b>        |     |                                                                                                                                                                                                              |            |
| Key results              | 18  | Summarise key results with reference to study objectives                                                                                                                                                     | 11-12      |
| Limitations              | 19  | Discuss limitations of the study, taking into account sources of potential bias or imprecision. Discuss both direction and magnitude of any potential bias                                                   | 14-15      |
| Interpretation           | 20  | Give a cautious overall interpretation of results considering objectives, limitations, multiplicity of analyses, results from similar studies, and other relevant evidence                                   | 15         |
| Generalisability         | 21  | Discuss the generalisability (external validity) of the study results                                                                                                                                        | 15         |
| <b>Other information</b> |     |                                                                                                                                                                                                              |            |
| Funding                  | 22  | Give the source of funding and the role of the funders for the present study and, if applicable, for the original study on which the present article is based                                                | 1          |

\*Give information separately for cases and controls in case-control studies and, if applicable, for exposed and unexposed groups in cohort and cross-sectional studies.

**Note:** An Explanation and Elaboration article discusses each checklist item and gives methodological background and published examples of transparent reporting. The STROBE checklist is best used in conjunction with this article (freely available on the Web sites of PLoS Medicine at <http://www.plosmedicine.org/>, Annals of Internal Medicine at <http://www.annals.org/>, and Epidemiology at <http://www.epidem.com/>). Information on the STROBE Initiative is available at [www.strobe-statement.org](http://www.strobe-statement.org).

# BMJ Open

## Effects of Reproductive Period Duration and Number of Pregnancies on Mid-Life Electrocardiographic Indices: A Secondary Analysis from the Women's Health Initiative Clinical Trial

|                                 |                                                                                                                                                                                                                                                                                                                                                                                                                                                                                                                                                                                        |
|---------------------------------|----------------------------------------------------------------------------------------------------------------------------------------------------------------------------------------------------------------------------------------------------------------------------------------------------------------------------------------------------------------------------------------------------------------------------------------------------------------------------------------------------------------------------------------------------------------------------------------|
| Journal:                        | <i>BMJ Open</i>                                                                                                                                                                                                                                                                                                                                                                                                                                                                                                                                                                        |
| Manuscript ID                   | bmjopen-2017-019129.R2                                                                                                                                                                                                                                                                                                                                                                                                                                                                                                                                                                 |
| Article Type:                   | Research                                                                                                                                                                                                                                                                                                                                                                                                                                                                                                                                                                               |
| Date Submitted by the Author:   | 30-May-2018                                                                                                                                                                                                                                                                                                                                                                                                                                                                                                                                                                            |
| Complete List of Authors:       | Parikh, Nisha; University of California San Francisco, Medicine<br>Kapphahn, Kristopher; Stanford University School of Medicine<br>Haley, Haley; Stanford University School of Medicine<br>Olgin, Jeffrey; University of California San Francisco, Medicine<br>Allison, Matthew; UCSD,<br>Magnani, Jared; University of Pittsburgh, Medicine<br>Ryckman, KK; University of Iowa, Epidemiology<br>Waring, Molly ; University of Connecticut, Allied Health Sciences<br>Perez, Marco; Stanford University, Cardiovascular Medicine<br>Howard, Barbara; MedStar Health Research Institute |
| <b>Primary Subject Heading</b>: | Cardiovascular medicine                                                                                                                                                                                                                                                                                                                                                                                                                                                                                                                                                                |
| Secondary Subject Heading:      | Reproductive medicine, Epidemiology, Obstetrics and gynaecology                                                                                                                                                                                                                                                                                                                                                                                                                                                                                                                        |
| Keywords:                       | women, Adult cardiology < CARDIOLOGY, menopause, ECG, pregnancy                                                                                                                                                                                                                                                                                                                                                                                                                                                                                                                        |
|                                 |                                                                                                                                                                                                                                                                                                                                                                                                                                                                                                                                                                                        |

SCHOLARONE™  
Manuscripts

1  
2  
3 1  
4 2 **Effects of Reproductive Period Duration and Number of**  
5 3 **Pregnancies on Mid-Life Electrocardiographic Indices: A**  
6 4 **Secondary Analysis from the Women's Health Initiative Clinical**  
7 5 **Trial**  
8  
9  
10  
11 6  
12 7  
13 8  
14 9  
15

16 10 **Authors:** Nisha I. Parikh MD MPH (1), Kristopher Kapphahn PhD (2), Haley Hedlin PhD (2),  
17 11 Jeffrey E. Olgin MD (1), Matthew A. Allison MD (3), Jared W. Magnani MD (4), MSc, Kelli R.  
18 12 Ryckman PhD (5), Molly E. Waring PhD (6), Marco V. Perez MD (7), Barbara V. Howard PhD  
19 13 (8)  
20 14

- 21 15 1) Division of Cardiology, University of California San Francisco, San Francisco, CA  
22 16 2) Quantitative Sciences Unit, Department of Medicine, Stanford University School of  
23 17 Medicine.  
24 18 3) Department of Family Medicine, La Jolla USCD  
25 19 4) Division of Cardiology, Boston University School of Medicine, Boston, MA  
26 20 5) Department of Epidemiology, College of Public Health, University of Iowa, IO  
27 21 6) Division of Epidemiology of Chronic Diseases and Vulnerable Populations,  
28 22 Department of Quantitative Health Sciences, University of Massachusetts Medical  
29 23 School, Worcester, MA  
30 24 7) Department of Medicine, Stanford University School of Medicine, Stanford, CA  
31 25 8) MedStar Health Research Institute, Hyattsville, MD and Georgetown and Howard  
32 26 Universities Center for Clinical and Translational Science  
33  
34  
35  
36  
37  
38  
39  
40  
41  
42  
43  
44  
45  
46  
47  
48  
49  
50  
51  
52  
53  
54  
55  
56  
57  
58  
59  
60

28 *Corresponding author: Nisha I. Parikh, MD MPH*

29 *E-mail: parikh.nisha@gmail.com*

31 Running Title: Reproductive factors and electrocardiographic intervals

33 Key Words: endogenous estrogen, sex hormones, pregnancy, menarche, menopause,  
34 reproductive history, menarche, age at birth, repolarization, QTc, PR interval, electrocardiogram

36 Word Count: 4196

38 Funding: This work was supported by AHA grant 13CRP17350002 (NIP), NIH grants  
39 7R21HL115398 (NIP), KL2TR000160 (MEW) and U01HL105268 (MEW), NHLBI/NIH &  
40 DHHS through contracts, HHSN268201100046C, HHSN268201100001C,  
41 HHSN268201100002C, HHSN268201100003C, HHSN268201100004C  
42  
43  
44  
45

44 *Conflict of Interest: None of the authors have any conflicts of interest in respect to this article*



1  
2  
3 **46 Abstract: (word count=297)**

4  
5 **47 Objectives:** Pregnancy, menses and menopause are related to fluctuations in endogenous sex  
6  
7 **48** hormones in women, which cumulatively, may alter cardiac electrical conduction. Therefore, we  
8  
9 **49** sought to study the association between number of pregnancies and reproductive period duration  
10  
11 **50** (RD, time from menarche to menopause) with electrocardiographic intervals in the Women's  
12  
13 **51** Health Initiative Clinical Trials.

14  
15 **52 Design:** Secondary Analysis of Multicenter Clinical Trial.

16  
17 **53 Setting:** United States.

18  
19 **54 Primary Outcome Measures:** Electrocardiographic Intervals: PR interval, P wave duration, P  
20  
21 **55** wave dispersion, QTc interval

22  
23 **56 Participants:** n=40,687 women (mean age=62 years) participating in the Women's Health  
24  
25 **57** Initiative Clinical Trials. 82.5% were White, 9.3% Black, 4% Hispanic and 2.7% Asian.

26  
27 **58 Methods:** In primary analysis, we employed multivariable linear regression models relating  
28  
29 **59** number of pregnancies and RD with millisecond (ms) changes in intervals from enrollment  
30  
31 **60** electrocardiogram. We studied effect modification by hormone therapy use.

32  
33 **61 Results:** Among participants, 5+ live births versus 0 prior pregnancies was associated with a  
34  
35 **62** 1.32 ms increase in PR interval [95% CI (0.25, 2.38)], with a graded association with longer QTc  
36  
37 **63** interval (ms) [none (prior pregnancy, no livebirths)= 0.66 (-0.56, 1.88), 1= 0.15 (-0.71, 1.02), 2  
38  
39 **64** to 4= 0.25 (-0.43, 0.94), and 5+ live births=1.15 (0.33, 1.98), p = 0.008]. RD was associated with  
40  
41 **65** longer PR interval and maximum P wave duration (but not P-wave dispersion) among never  
42  
43 **66** users of hormone therapy: [PR (ms) per additional RD year: 0.10 (0.04, 0.16); higher P-wave  
44  
45 **67** duration (ms): 0.09 (0.06, 0.12)]. For every year increase in reproductive period, QTc decreased  
46  
47 **68** by 0.04 ms (-0.07, -0.01).

69 **Conclusions:** An increasing number of live births is related to increased and RD to decreased  
70 ventricular repolarization time. Both grandmultiparity and longer RD are related to increased  
71 atrial conduction time. Reproductive factors that alter midlife cardiac electrical conduction  
72 system remodeling in women may modestly influence CVD risk in later life.

#### 74 **Article Summary:**

75 *Strengths and Limitations of the Study.*

- 76 • *A strength is the use of a well characterized multiethnic, large dataset of postmenopausal*  
77 *women representative of women in the United States.*
- 78 • *A notable limitation is that the exposure variables were acquired retrospectively.*
- 79 • *We were unable to adjust for pregnancy complications such as preeclampsia or*  
80 *gestational diabetes.*

83 **Key Words:** *endogenous estrogen, sex hormones, pregnancy, menarche, menopause,*  
84 *reproductive history, menarche, age at birth, repolarization, QTc, PR interval,*  
85 *electrocardiogram*

#### 88 **INTRODUCTION:**

89 *Electrocardiogram parameters reflect current as well as future CVD risk*

90 Electrocardiographic parameters are reflections of both current as well as future cardiovascular  
91 disease risk. For example, in the Framingham Heart Study, a prolonged PR interval (> 200 ms)  
92 (which is defined as the period, measured in milliseconds, that extends from the beginning of the

1  
2  
3 93 P wave (the onset of atrial depolarization) until the R wave), was related to incident atrial  
4  
5 94 fibrillation, all-cause mortality and to the likelihood of needing a permanent pacemaker.(1) In  
6  
7 95 addition to PR interval, the p wave duration (or the period in milliseconds during which the  
8  
9 96 atrium depolarizes), more directly relates to atrial size and is an antecedent of atrial  
10  
11 97 fibrillation.(2) Both PR interval and p wave duration are markers of left atrial size which in turn  
12  
13 98 is a correlate of hypertensive heart disease(3) and incident stroke.(4) P wave dispersion, defined  
14  
15 99 as the difference between the maximum and the minimum P-wave duration recorded from  
16  
17 100 multiple different-surface ECG leads, is an additional marker of atrial remodeling and antecedent  
18  
19 101 of atrial fibrillation.(5) It is unclear to what extent PR interval, p wave duration or P wave  
20  
21 102 dispersion are affected by premenopausal hormonal fluctuations from the menstrual cycle and  
22  
23 103 childbearing.  
24  
25  
26  
27  
28  
29  
30

### 31 *Pregnancy, cardiac remodeling and the electrocardiogram*

32  
33 106 Pregnancy and the post-partum period both have substantial physiologic effects on cardiac  
34  
35 107 electrophysiology. Physiologic studies of women during early and late pregnancy as well as early  
36  
37 108 post-partum suggest a shortening of the corrected QT interval (QTc) which partially reverts back  
38  
39 109 to pre-pregnancy values following post-partum.(6, 7) The QT interval is defined as the measure  
40  
41 110 of time between the onset of ventricular depolarization and completion of ventricular  
42  
43 111 repolarization, and because QT interval is strongly related to heart rate, the QTc is corrected for  
44  
45 112 heart rate. Direct pathophysiologic links connecting myocardial structural remodeling and  
46  
47 113 cardiac electrical remodeling have been increasingly recognized.(8) With regards to myocardial  
48  
49 114 remodeling, pregnancy induced cardiac remodeling does not completely revert back to pre-  
50  
51 115 pregnancy levels and effects of increasing parity on cardiac remodeling can be detected even in  
52  
53  
54  
55  
56  
57  
58  
59  
60

1  
2  
3 116 mid-life.(9) However, the extent to which an increasing number of pregnancies exerts long  
4  
5 117 lasting effects on the cardiac electrical conduction system is uncertain.(9)  
6  
7

8 118

9  
10 119 *Estrogen exposure and the electrocardiogram*  
11

12 120 In addition to the more marked hormonal fluctuations seen during pregnancy, there are also more  
13  
14 121 subtle, cyclic changes in estrogen and progesterone cycling that occur during menstrual cycling  
15  
16 122 in women of reproductive age. Testosterone and progesterone are recognized to decrease the  
17  
18 123 QTc interval.(10) Prior data from the Women's Health Initiative (WHI) Hormone Trial suggests  
19  
20 124 that estrogen-only post-menopausal therapy modestly prolongs QTc beyond that of both  
21  
22 125 estrogen-progestin therapy and placebo.(11) However, it is uncertain whether the pre-  
23  
24 126 menopausal endogenous hormonal fluctuations (reflected by the length of the interval from  
25  
26 127 menarche to menopause, and by number of pregnancies) are associated with changes in QTc in  
27  
28  
29  
30 128 the WHI.  
31  
32

33 129

34  
35 130 WHI represents a unique resource to study questions related to pregnancy and  
36  
37 131 reproductive history and ECG parameters and thus we sought to determine if there is a positive  
38  
39 132 or negative association between number of pregnancies and reproductive period duration with  
40  
41 133 mid-life electrocardiogram intervals (PR interval and QTc) and p wave parameters (p wave  
42  
43 134 maximum duration and dispersion).  
44  
45  
46

47 135

48  
49 136 **METHODS AND ANALYSIS PLAN:**  
50

51 137 Our current study design is a secondary analysis of a previously conducted set of clinical trials. .  
52  
53

54  
55 138 *Study sample.*  
56  
57

1  
2  
3 139 The WHI recruitment began in 1991 and consisted of a set of clinical trials/ and an  
4  
5 140 observational study on hormone therapy, dietary modification and calcium/ vitamin D  
6  
7  
8 141 supplementation on cardiovascular disease, cancer and fractures.(12) The clinicaltrial.gov  
9  
10 142 identifier for the WHI is NCT00000611. At the time of enrollment, all women enrolled in the  
11  
12 143 WHI were required to be between 50 and 79 years old, postmenopausal, and intending to reside  
13  
14 144 in the area for at least 3 years. Other enrollment criteria have been previously described.(13) This  
15  
16 145 analysis drew from the cohort of women enrolled in the WHI clinical trials (and not  
17  
18 146 observational study), as WHI clinical trial participants has ECGs performed per protocol.  
19  
20 147 Informed consent was obtained from all participants at study enrollment. **Figure 1** shows the  
21  
22 148 creation of the study sample. Of 68,132 women in WHI Studies (post- menopausal hormone  
23  
24 149 therapy, diet and calcium/vitamin D and observational studies), we excluded 5,217 who were  
25  
26 150 missing ECGs and 15,543 who had prevalent CVD. Because number of pregnancies and  
27  
28 151 reproductive period (in particular age at menopause) are known to be associated with later CVD  
29  
30 152 and a history of CVD is related strongly with ECG changes including QTc and certainly  
31  
32 153 increased PR, we sought to exclude women with a history of CVD in order to assess associations  
33  
34 154 between reproductive period duration and number of pregnancies that were not directly mediated  
35  
36 155 through CVD. Of these, 47,372 women, 6,685 were further excluded for having missing  
37  
38 156 covariate data, leaving a final sample of included women =40,687. In a missing imputation  
39  
40 157 sensitivity analysis described below, we additionally analyzed the 6,685 women with missing  
41  
42 158 covariate data (total n=54,057).  
43  
44  
45  
46  
47  
48  
49

### 50 159 *Patient and Public Involvement*

51  
52  
53 160 WHI was designed to address the gaps in knowledge about the major health issues in post  
54  
55 161 menopausal women. Patients assisted research staff in recruiting and results for all measures  
56  
57

1  
2  
3 162 done at the study examinations were explained to each participant. Major study results are  
4  
5 163 communicated to participants via newsletters.  
6  
7

8  
9 164 *Ascertainment of Reproductive Exposures.*  
10

11 165 Information on reproductive factors was collected via questionnaire at the second screening visit  
12  
13 166 in the WHI (between 1993-1998). Participants were asked how many times they had been  
14  
15 167 pregnant (were given choices ranging from 0 to 8+), number of live births, and how old they  
16  
17 168 were at the end of the first and at the end of their last pregnancy (<20, 20-24, 25-29,30-34,35+  
18  
19 169 years). In order to be able to also study women who had not experienced pregnancy and/or  
20  
21 170 childbirth and in an effort to make our study as representative as possible, we separately  
22  
23 171 categorized women who had had no prior pregnancies and women who had experienced a  
24  
25 172 pregnancy but no livebirths (i.e. due to miscarriage, stillbirth, or abortion) as separate categories.  
26  
27 173 We further categorized women based on our prior work demonstrating that having 5 or more  
28  
29 174 pregnancies was associated with greater cardiac remodeling.<sup>(9)</sup> Due to small cell sizes we  
30  
31 175 combined women with 5 or more pregnancies leading to livebirths into one category. Preliminary  
32  
33 176 data analysis reflected that 2-4 had similar effects sizes for PR and QTc and thus these categories  
34  
35 177 were collapsed into a single category for ease of interpretation. Therefore the exposure categories  
36  
37 178 for number of pregnancies leading to livebirths were as follows: no pregnancies (referent), none  
38  
39 179 (prior pregnancy, no livebirths), 1, 2-4, 5 or more. Age at menarche (<9, 10,11,12,13,14,15,>16  
40  
41 180 years) and age at menopause was asked on this screening questionnaire. Reproductive period  
42  
43 181 duration (RD) was defined as the duration between age at menarche to age at menopause (in  
44  
45 182 years). Detailed current and prior hormone therapy (or post-menopausal hormone replacement  
46  
47 183 therapy) usage and hysterectomy/oophorectomy status was collected at enrollment and has been  
48  
49  
50  
51  
52  
53  
54  
55  
56  
57  
58  
59  
60

1  
2  
3 184 previously described.(14) Questions regarding the use and duration of oral contraceptive usage  
4  
5 185 was also collected at enrollment.  
6  
7

8  
9 186 *Ascertainment of Covariates:*

10  
11  
12 187 Age, income, education, self-reported race/ethnicity, geographic region of United States, history  
13  
14 188 and duration of breastfeeding were collected at participant enrollment and second screening  
15  
16 189 examinations. Body mass index (BMI, kg/m<sup>2</sup>) was calculated using height and weight measured  
17  
18 190 by study staff at baseline. Women with hypertension were identified as those with a self-reported  
19  
20 191 history of treated hypertension or blood pressure measurements meeting JNC 7 criteria for  
21  
22 192 hypertension.(15) Diabetes was identified by self-reported use of anti-diabetic medications and  
23  
24 193 hyperlipidemia by use of cholesterol lowering medications.  
25  
26  
27

28  
29 194 *Electrocardiographic parameters:*

30  
31  
32 195 Standard 12-lead ECGs were recorded in all women by strictly standardized procedures in all  
33  
34 196 clinical centers as has been described.(16) All ECGs were processed in a central laboratory  
35  
36 197 (EPICARE Center, University of Alberta, Edmonton, Canada, and later Wake Forest University,  
37  
38 198 Winston-Salem, NC), where they were visually inspected for technical errors and inadequate  
39  
40 199 quality. ECGs were processed with the 2001 version of the Marquette 12-SL program (GE  
41  
42 200 Marquette). In addition to PR and QT intervals, we also examined the maximum P wave duration  
43  
44 201 and dispersion (from all 12 leads of the ECG).(2) The QT interval was corrected using Bazett's  
45  
46 202 formula. The Institutional Review Board of University of California San Francisco approved this  
47  
48 203 study protocol.  
49  
50  
51  
52

53  
54 204 *Statistical Methods:*  
55  
56  
57

1  
2  
3 205 Primary Analysis  
4

5 206 We employed multivariable linear regression to assess the association between reproductive  
6  
7 207 exposures (number of pregnancies and RD) with the dependent variable of ECG parameters (PR  
8  
9 208 interval in milliseconds, p wave duration, p wave dispersion, QTc in milliseconds). Multivariable  
10  
11 209 models were adjusted for a priori covariates: age, BMI, hypertension status, diabetes, income,  
12  
13 210 education, race/ethnicity, region, history of breastfeeding, antianxiety medication, antidepressant  
14  
15 211 medication, lipid medication, duration of breastfeeding, oophorectomy status, hormone therapy  
16  
17 212 use, heart rate and QRS duration. In analyses considering categories of livebirths we employed a  
18  
19 213 linear trend test.  
20  
21  
22

23  
24 214 We explored effect modification of the primary exposures, number of live births and RD, by  
25  
26 215 hormone therapy usage and hysterectomy status. We classified hormone therapy usage into three  
27  
28 216 categories: women who reported current, prior or no hormone therapy usage. A statistical  
29  
30 217 interaction term between hormone therapy usage and the exposure (RD or number of live births)  
31  
32 218 was used to consider effect modification by reported hormone therapy use. When the statistical  
33  
34 219 interaction term was statistically significant ( $p < 0.05$ ) according to a likelihood ratio test, we  
35  
36 220 presented the estimates in each of the three categories of hormone therapy use and we presented  
37  
38 221 a single estimate if there was no evidence for effect modification by hormone therapy. A similar  
39  
40 222 approach was employed for studying RD or number of live births and hysterectomy status. To  
41  
42 223 show sensitivity of estimates to confounders, unadjusted associations were reported as well as  
43  
44 224 those associations adjusted for the confounders listed above.  
45  
46  
47  
48

49 225

50  
51 226 *Secondary Analyses:*  
52  
53  
54  
55  
56  
57



1  
2  
3 227 In secondary analyses, we removed subjects who reported never being pregnant and used  
4  
5 228 multivariable linear regression to model associations between age at first live birth and the five  
6  
7 229 electrocardiographic measures. These models used the same covariates to adjust association as  
8  
9  
10 230 those in our primary analyses. Subjects who had implausible secondary outcome values (i.e. all  
11  
12 231 zero values or all constant values across all electrocardiographic measures) were removed. We  
13  
14 232 additionally adjusted for covariates that we were concerned may have confounded the  
15  
16 233 associations between exposure and dependent variables in our study. We additionally fit  
17  
18 234 additional models which included both RD and number of pregnancies to ensure that one  
19  
20 235 exposure did not alter the other's association with the dependent variables. Given that anxiety  
21  
22 236 and depression could affect both exposure and dependent variables in our study, we further  
23  
24 237 adjusted for use of these medications. Antianxiety and antidepressant medication use (selective  
25  
26 238 serotonin reuptake inhibitors (or SSRI) and non-SSRI) were recorded on enrollment by nurse  
27  
28 239 examination of medication bottles. Medications were classified according to the National Drug  
29  
30 240 Index classification system. We adjusted for Ca/Vitamin D status, oral contraceptive usage  
31  
32 241 (yes/no and duration or usage). We further adjusted for menstrual irregularities/fertility  
33  
34 242 disorders/and endometriosis, which are also related to hormonal fluctuations in women.  
35  
36  
37  
38  
39

#### 40 243 *Multiple Imputation Analyses*

41  
42 244 There were n=6,685 women in our study with missing covariate data. We used multiple  
43  
44 245 imputation techniques to impute missing covariates and refit models from primary analyses to  
45  
46 246 explore the sensitivity of our results to missing data. We used the PROC MI in SAS to construct  
47  
48 247 20 multiply imputed data sets. Missing variables were imputed via fully conditional specification  
49  
50 248 method in PROC MI using all variables from the analytic model. We fit models to each imputed  
51  
52  
53  
54  
55  
56  
57  
58  
59  
60

1  
2  
3 249 data set and pooled the results. The pooled results from imputation did not differ appreciably  
4  
5 250 from the results of the complete case analysis (data not shown).

6  
7 251 All analyses were performed in SAS 9.4 (SAS Institute, Cary NC, USA).

8  
9  
10 252

## 11 12 253 **RESULTS**

13  
14 254 **Table 1** shows the baseline characteristics of our sample including women who were included in  
15  
16 255 our study and those excluded from analysis for missing variables. Data is displayed by number of  
17  
18 256 pregnancies lasting at least 6 months. The mean age at enrollment was 62.4 years, while the  
19  
20 257 mean age at menarche was 12.6 and mean age at menopause was 50.0 years. 82.5% of women  
21  
22 258 were White, 9.3% Black, 4% Hispanic and 2.7% Asian. Forty five percent of the study sample  
23  
24 259 reported never having used hormone therapy prior to enrollment.  
25  
26  
27  
28  
29

### 30 31 261 *PR interval*

32  
33 262 Compared to women reporting never having been pregnant, having 5 or more pregnancies was  
34  
35 263 associated with a 1.3 ms longer PR interval (**Table 2**). Among women who reported never  
36  
37 264 having used hormones, each additional year of reported reproductive period duration was  
38  
39 265 associated with a 0.1 ms longer PR interval (or atrial conduction velocity). Conversely, there  
40  
41 266 was no significant association between RD and PR interval among women who reported prior or  
42  
43 267 current hormone therapy use (p value for interaction < 0.01) (**Table 2**). Age at first live birth,  
44  
45 268 was not related to PR interval (data not shown).

### 46 47 269 *QTc*

48  
49  
50 270 Compared to never having been pregnant, having 5 or more pregnancies was related to a 1.2 ms  
51  
52 271 longer QTc (**Table 3**). However, not carrying a pregnancy to term, or having 1 or 2-4 term  
53  
54  
55  
56  
57

1  
2  
3 272 pregnancies (versus not being pregnant), were not related to QTc. For each additional year in  
4  
5 273 reproductive period duration, there was a 0.4 ms shorter QTc (**Table 3**). Restricting to women  
6  
7 274 who had at least one live birth did not change our results (data not shown).  
8  
9

#### 10 275 *P wave duration and dispersion*

11  
12 276 P wave dispersion was higher for women with 2-4 live births (ms increase =0.62, 95% CI: 0.01,  
13  
14 277 1.24) and 5 live births (0.94, 95% CI: 0.20, 1.67), compared with those who reported never  
15  
16 278 having been pregnant (**Table 4**). Reproductive period duration was related to maximum p wave  
17  
18 279 duration among women who reported never having used hormones (0.09, 95% CI: 0.06, 0.13)  
19  
20 280 but not among those who reported prior or current hormone therapy use (p interaction < 0.01)  
21  
22 281 (**Table 5**).  
23  
24  
25

26 282  
27  
28 283 Secondary results: Models that contained both RD and number of pregnancies together were not  
29  
30 284 materially different (data not shown). Further adjustment for antidepressants and anti-anxiety  
31  
32 285 medications did not materially affect our results. Further adjustment for Ca and Vitamin D status  
33  
34 286 or oral contraceptive use, and/or duration did not materially affect our results. Further adjustment  
35  
36 287 for menstrual irregularities/fertility disorders/and endometriosis did not materially change our  
37  
38 288 results.  
39  
40  
41

42 289  
43  
44 290  
45

## 46 291 **DISCUSSION**

### 47 292 *Summary of Findings*

48  
49 293 We found that having five or more pregnancies compared to none was associated with a small  
50  
51 294 increase in mid-life atrial conduction time, independent of factors known to be associated with  
52  
53  
54  
55  
56  
57  
58  
59  
60

1  
2  
3 295 this interval (PR). Number of live births among women with at least one live birth (compared to  
4  
5 296 no prior pregnancies) was associated with increased atrial conduction time. Having 5 or more  
6  
7 297 pregnancies was related to a small increase in ventricular repolarization time as compared to  
8  
9 298 having no prior pregnancies. Among women reporting no prior exogenous hormone use, each  
10  
11 299 additional year of reported RD was related to a very modest (0.1 ms) longer atrial conduction  
12  
13 300 time. RD was related to a very modest increase in p wave duration. RD was related to a shorter  
14  
15 301 ventricular repolarization time.  
16  
17  
18  
19  
20

302

### 303 *Mechanisms linking pregnancy and atrial electrical remodeling*

304 The effect of cumulative pregnancies on mid-life electrocardiograms would likely result from  
305 both 1) the pregnancy itself and 2) incident cardiometabolic factors that are impacted by  
306 pregnancy such as adiposity(17) and vascular stiffness,(18) and premenopausal blood  
307 pressure.(19) Adiposity and blood pressure are related to increased P wave indices in a normal  
308 healthy population,(20) and these P wave indices are electrocardiographic reflections of  
309 increased left atrial pressure, size and potentially fibrosis. The period of pregnancy and the  
310 peripartum are characterized by hormonal changes that affect both cardiovascular hemodynamics  
311 and adaptive myocardial remodeling.(21) Pregnancy causes increased cardiac output, increased  
312 left ventricular mass, and decreased systemic vascular resistance.(22) The uterus and placenta in  
313 support of the growing fetus and fetal circulatory system represent a significant vascular shunt  
314 which contributes to these hemodynamic adaptations in pregnancy.(22) The sum of these  
315 changes result in both left atrial and left ventricular dilation. However, the effects of normal  
316 pregnancy on electrographic remodeling during pregnancy are not well described. A prior small

1  
2  
3 317 clinical study has looked at P wave duration and P wave dispersion among pregnant women  
4  
5 318 compared with controls and found that both of these parameters are increased.(23)  
6  
7

8 319

9  
10 320 *Pregnancy and cumulative effects on ventricular repolarization*  
11

12 321 A prior study in 37 women in late pregnancy compared with 18 age matched controls  
13  
14 322 demonstrated that QTc substantially prolongs late in pregnancy and that this only partially  
15  
16 323 corrects back to pre-pregnancy values post-partum.(7) Our finding that having 5 or more  
17  
18 324 pregnancies as compared to no prior pregnancies suggests that QTc prolongation during  
19  
20 325 pregnancy may accumulate across successive pregnancies and will be significantly increased on  
21  
22 326 mid-life ECG. Furthermore, we found evidence for a dose response relationship between number  
23  
24 327 of pregnancies and mid-life QTc. Cardiac electrical remodeling often reflects myocardial  
25  
26 328 remodeling. We previously demonstrated that an increasing number of pregnancies were related  
27  
28 329 to left ventricular volume increase and increase in left ventricular mass in a multiethnic cohort of  
29  
30 330 women.(9) The increase in cardiac volume and mass were more marked in grandmultipara's or  
31  
32 331 women who had 5 or more pregnancies leading to livebirths.(9) It is important to note that  
33  
34 332 grandmultiparity is less common with declining parity levels in the United States.  
35  
36  
37  
38  
39

40 333

41  
42 334 *Reproductive period duration and atrial conduction.*  
43

44 335 The menstrual cycle consists of a relatively well described hormone cycling in women consisting  
45  
46 336 of both estrogen and progesterone as well as testosterone production. A longer reproductive  
47  
48 337 period duration reflects the cumulative exposure that a woman has to these endogenous  
49  
50 338 fluctuations in sex hormone levels. Indeed, prior studies have assessed P wave parameters  
51  
52 339 throughout the menstrual cycle and noted that P wave duration is substantially increased in the  
53  
54  
55  
56  
57  
58  
59  
60

1  
2  
3 340 luteal phase.(24) Among women who did report taking prior hormone therapy, we observed a  
4  
5 341 very modest but significant increase in mid-life PR interval and in P wave duration. Exogenous  
6  
7 342 hormone therapy use may obscure the relationship between endogenous hormone exposure from  
8  
9 343 a longer reproductive period duration and P wave parameters, which would explain our findings  
10  
11 344 of effect modification by hormone therapy use. An earlier age at menarche (which would be  
12  
13 345 related to increased reproductive period duration) has been associated with increased  
14  
15 346 adiposity(25) and diabetes,(26) which in turn have been linked with increased p wave  
16  
17 347 duration(2) and, in the case of body mass index, with increased left atrial remodeling(27) and  
18  
19 348 thus may also partially underlie our findings.  
20  
21  
22  
23

24 349

25  
26 350 *Reproductive duration and decrease ventricular repolarization time*

27  
28 351 The QTc is shortened by the action of progesterone and lengthened by estrogen during normal  
29  
30 352 menstrual cycling. The net effect of these changes during a single menstrual cycle can result in  
31  
32 353 shortening of ventricular repolarization time or QTc.(28) Our finding that an increased  
33  
34 354 reproductive duration was modestly inversely related to QTc in WHI. Underlying these findings  
35  
36 355 may be that increasing exposure to progesterone, in particular during menstrual cycling, may  
37  
38 356 have cumulative and measurable effects on the mid-life electrocardiogram in women.  
39  
40  
41

42 357

43  
44 358 *Clinical relevance of our findings.*

45  
46 359 The PR interval normally ranges from 120 to 200 ms in duration. Therefore our finding that  
47  
48 360 having 5 or more livebirths versus never having been pregnant was associated with an adjusted  
49  
50 361 increase in PR interval of 1.32 ms, has modest clinical significance. For an individual with a PR  
51  
52 362 interval at the upper limits of normal, 1.32 ms may be more clinically relevant in terms of the  
53  
54  
55  
56  
57  
58  
59  
60

1  
2  
3 363 increased risks of later cardiovascular diseases with PR >200 ms. (1) The association of number  
4  
5 364 of pregnancies leading to livebirths with QTc (with 5 or more pregnancies leading to livebirths  
6  
7 365 having a 1.15 ms increase in QTc compared to nulligravid women) is similarly modest with a  
8  
9  
10 366 normal QTc ranging from ~350 to 460 ms in women. The effect sizes for reproductive duration  
11  
12 367 were even more modest in size than those for P wave indices and therefore likely have more  
13  
14 368 relevance in terms of uncovering novel biologic mechanisms related to cardiac electrical  
15  
16 369 remodeling rather than reflecting clinically significant differences among individuals.  
17  
18

19 370

### 21 371 *Strength and Limitations*

22  
23  
24 372 The use of a well characterized multiethnic, large dataset of postmenopausal women  
25  
26 373 representative of women in the United States is a strength of our study. A notable limitation is  
27  
28 374 potential recall bias since the exposure variables were acquired retrospectively and some are very  
29  
30 375 distant events (eg age at menarche occurred 40-70 years in the past). We were unable to adjust  
31  
32 376 for pregnancy complications such as preeclampsia or gestational diabetes since these were not  
33  
34 377 collected. We did not adjust for smoking, physical activity, and habitual consumption of alcohol  
35  
36 378 and coffee which may have been related to the exposure variables but are not widely known to  
37  
38 379 be related to the ECG dependent variables studied. We studied number of pregnancies in a  
39  
40 380 categorical fashion and were unable, due to data constraints, to look at number of pregnancies as  
41  
42 381 a continuous variables.  
43  
44  
45

46 382

### 49 383 *Directions for future research:*

50  
51 384 Future studies that disentangle specific hormonal and molecular mechanisms that underlie the  
52  
53 385 association demonstrated in our study will help us better understand our study findings.  
54  
55  
56  
57  
58  
59

1  
2  
3 386 Understanding which specific fertility factors alter electrical remodeling in women is an  
4  
5 387 important direction for future research.  
6  
7

8 388

9  
10 389 *Conclusions*

11  
12 390 We found that having five or more pregnancies leading to livebirths compared to never having  
13  
14 391 been pregnant is related to small but significant changes in atrial conduction time and ventricular  
15  
16 392 repolarization time. A longer reproductive period duration in women not exposed to exogenous  
17  
18 393 hormone therapy is related to a modest increase in atrial conduction time and to a modest  
19  
20 394 decrease in ventricular repolarization. Reproductive health factors reflective of endogenous sex  
21  
22 395 hormone exposure may be significant determinants of cardiac electrical remodeling in mid-life.  
23  
24

25 396

26  
27  
28 397 *Disclosures*

29  
30 398 None  
31  
32

33 399

34  
35 400 *Author contributorship statement:*

36  
37 401 Nisha I. Parikh conceived of the idea, designed the study, interpreted the analysis, drafted and  
38 402 critically reviewed the manuscript. She provided final approval of the manuscript

39  
40 403 Kristopher Kapphahn and Haley Hedlin conducted study design, statistical analysis and critical  
41 404 review of the manuscript. They provided final approval of the manuscript

42  
43  
44 405 Jeffrey E. Olgin, Matthew A. Allison, Jared W. Magnani, MSc, Kelli R. Ryckman, Molly E.  
45 406 Waring, Marco V. Perez assisted with study design, analysis interpretation, drafting and critical  
46 407 reviewed the manuscript. They provided final approval of the manuscript

47  
48  
49 408 Barbara V. Howard assisted with study design, interpreted the analysis, drafted and critically  
50 409 reviewed the manuscript. They provided final approval of the manuscript

51  
52 410 *Data sharing statement:*  
53  
54  
55  
56  
57



1  
2  
3 411 This was a secondary analysis of preexisting data and as such, no new data was generated by this  
4 412 study. Information about data sharing for the Women's Health Initiative can be found at the  
5 413 following website: <https://www.whi.org/researchers/data/Pages/Home.aspx>  
6  
7

8 414

9  
10 415 **References**  
11

- 12 416 1. Cheng S, Keyes MJ, Larson MG, McCabe EL, Newton-Cheh C, Levy D, et al. Long-term  
13 417 outcomes in individuals with prolonged PR interval or first-degree atrioventricular block. *JAMA*  
14 418 : the journal of the American Medical Association. 2009;301(24):2571-7.  
15 419 2. Magnani JW, Williamson MA, Ellinor PT, Monahan KM, Benjamin EJ. P wave indices:  
16 420 current status and future directions in epidemiology, clinical, and research applications.  
17 421 *Circulation Arrhythmia and electrophysiology*. 2009 Feb;2(1):72-9. PubMed PMID: 19808445.  
18 422 Pubmed Central PMCID: PMC2760837. Epub 2009/10/08. eng.  
19 423 3. Cuspidi C, Rescaldani M, Sala C. Prevalence of echocardiographic left-atrial enlargement  
20 424 in hypertension: a systematic review of recent clinical studies. *American journal of hypertension*.  
21 425 2013 Apr;26(4):456-64. PubMed PMID: 23388831. Epub 2013/02/08. eng.  
22 426 4. Yaghi S, Moon YP, Mora-McLaughlin C, Willey JZ, Cheung K, Di Tullio MR, et al. Left  
23 427 atrial enlargement and stroke recurrence: the northern Manhattan stroke study. *Stroke; a journal*  
24 428 *of cerebral circulation*. 2015 Jun;46(6):1488-93. PubMed PMID: 25908460. Pubmed Central  
25 429 PMCID: PMC4442058. Epub 2015/04/25. eng.  
26 430 5. Pérez-Riera AR, de Abreu LC, Barbosa-Barros R, Grindler J, Fernandes-Cardoso A,  
27 431 Baranchuk A. P-wave dispersion: an update. *Indian Pacing and Electrophysiology Journal*. 2016  
28 432 Jul-Aug  
29 433 10/20  
30 434 08/29/received  
31 435 10/20/accepted;16(4):126-33. PubMed PMID: PMC5197451.  
32 436 6. Baumert M, Seeck A, Faber R, Nalivaiko E, Voss A. Longitudinal changes in QT interval  
33 437 variability and rate adaptation in pregnancies with normal and abnormal uterine perfusion.  
34 438 *Hypertens Res*. 2010;33(6):555-60.  
35 439 7. Lechmanova M, Kittnar O, Mlcek M, Slavicek J, Dohnalova A, Havranek S, et al. QT  
36 440 dispersion and T-loop morphology in late pregnancy and after delivery. *Physiological research /*  
37 441 *Academia Scientiarum Bohemoslovaca*. 2002;51(2):121-9.  
38 442 8. Burchfield JS, Xie M, Hill JA. Pathological ventricular remodeling: mechanisms: part 1  
39 443 of 2. *Circulation*. 2013 Jul 23;128(4):388-400. PubMed PMID: 23877061. Pubmed Central  
40 444 PMCID: PMC3801217. Epub 2013/07/24. eng.  
41 445 9. Parikh NI, Lloyd-Jones DM, Ning H, Ouyang P, Polak JF, Lima JA, et al. Association of  
42 446 number of live births with left ventricular structure and function. *The Multi-Ethnic Study of*  
43 447 *Atherosclerosis (MESA)*. *American heart journal*. 2012 Mar;163(3):470-6. PubMed PMID:  
44 448 22424019. Epub 2012/03/20. eng.  
45 449 10. Sedlak T, Shufelt C, Iribarren C, Merz CN. Sex Hormones and the QT Interval: A  
46 450 Review. *J Womens Health*. 2012;4:4.  
47 451 11. Kadish AH, Greenland P, Limacher MC, Frishman WH, Daugherty SA, Schwartz JB.  
48 452 Estrogen and progestin use and the QT interval in postmenopausal women. *Annals of*  
49 453 *noninvasive electrocardiology : the official journal of the International Society for Holter and*  
50 454 *Noninvasive Electrocardiology, Inc*. 2004;9(4):366-74.  
51  
52  
53  
54  
55  
56  
57  
58  
59  
60

- 1  
2  
3 455 12. Design of the Women's Health Initiative clinical trial and observational study. The  
4 456 Women's Health Initiative Study Group. *Controlled clinical trials*. 1998 Feb;19(1):61-109.  
5 457 PubMed PMID: 9492970. Epub 1998/03/11. eng.
- 6  
7 458 13. Hays J, Hunt JR, Hubbell FA, Anderson GL, Limacher M, Allen C, et al. The Women's  
8 459 Health Initiative recruitment methods and results. *Annals of epidemiology*. 2003 Oct;13(9  
9 460 Suppl):S18-77. PubMed PMID: 14575939. Epub 2003/10/25. eng.
- 10  
11 461 14. Rossouw JE, Anderson GL, Prentice RL, LaCroix AZ, Kooperberg C, Stefanick ML, et  
12 462 al. Risks and benefits of estrogen plus progestin in healthy postmenopausal women: principal  
13 463 results From the Women's Health Initiative randomized controlled trial. *JAMA: The Journal of*  
14 464 *the American Medical Association*. 2002 07/17;288(3):321-33. PubMed PMID: 507.
- 15 465 15. Chobanian AV, Bakris GL, Black HR, Cushman WC, Green LA, Izzo JL, Jr., et al. The  
16 466 Seventh Report of the Joint National Committee on Prevention, Detection, Evaluation, and  
17 467 Treatment of High Blood Pressure: the JNC 7 report. *JAMA: The Journal of the American*  
18 468 *Medical Association*. 2003 05/21;289(19):2560-72. PubMed PMID: 51.
- 19 469 16. Rautaharju PM, Kooperberg C, Larson JC, LaCroix A. Electrocardiographic  
20 470 abnormalities that predict coronary heart disease events and mortality in postmenopausal  
21 471 women: the Women's Health Initiative. *Circulation*. 2006 Jan 31;113(4):473-80. PubMed PMID:  
22 472 16449726. Epub 2006/02/02. eng.
- 23  
24 473 17. Bobrow KL, Quigley MA, Green J, Reeves GK, Beral V. Persistent effects of women's  
25 474 parity and breastfeeding patterns on their body mass index: results from the Million Women  
26 475 Study. *International journal of obesity (2005)*. 2013 May;37(5):712-7. PubMed PMID:  
27 476 22777544. Pubmed Central PMCID: PMC3647235. Epub 2012/07/11. eng.
- 28  
29 477 18. Vaidya D, Bennett WL, Sibley CT, Polak JF, Herrington DM, Ouyang P. Association of  
30 478 parity with carotid diameter and distensibility: multi-ethnic study of atherosclerosis.  
31 479 *Hypertension*. 2014 Aug;64(2):253-8. PubMed PMID: 24842921. Pubmed Central PMCID:  
32 480 PMC4184976. Epub 2014/05/21. eng.
- 33 481 19. Giubertoni E, Bertelli L, Bartolacelli Y, Origliani G, Modena MG. Parity as predictor of  
34 482 early hypertension during menopausal transition. *Journal of hypertension*. 2013 Mar;31(3):501-  
35 483 7; discussion 7. PubMed PMID: 23196900. Epub 2012/12/01. eng.
- 36  
37 484 20. Magnani JW, Johnson VM, Sullivan LM, Lubitz SA, Schnabel RB, Ellinor PT, et al. P-  
38 485 wave indices: derivation of reference values from the Framingham Heart Study. *Annals of*  
39 486 *noninvasive electrocardiology : the official journal of the International Society for Holter and*  
40 487 *Noninvasive Electrocardiology, Inc*. 2010 Oct;15(4):344-52. PubMed PMID: 20946557. Pubmed  
41 488 Central PMCID: PMC3394095. Epub 2010/10/16. eng.
- 42 489 21. Simmons LA, Gillin AG, Jeremy RW. Structural and functional changes in left ventricle  
43 490 during normotensive and preeclamptic pregnancy. *American journal of physiology Heart and*  
44 491 *circulatory physiology*. 2002 Oct;283(4):H1627-33. PubMed PMID: 12234817. Epub  
45 492 2002/09/18. eng.
- 46  
47 493 22. Ouzounian JG, Elkayam U. Physiologic changes during normal pregnancy and delivery.  
48 494 *Cardiology clinics*. 2012 Aug;30(3):317-29. PubMed PMID: 22813360. Epub 2012/07/21. eng.
- 49 495 23. Ozmen N, Cebeci BS, Yiginer O, Muhcu M, Kardesoglu E, Dincturk M. P-wave  
50 496 dispersion is increased in pregnancy due to shortening of minimum duration of P: does this have  
51 497 clinical significance? *The Journal of international medical research*. 2006 Sep-Oct;34(5):468-74.  
52 498 PubMed PMID: 17133775. Epub 2006/12/01. eng.
- 53  
54  
55  
56  
57  
58  
59  
60

- 1  
2  
3 499 24. Karabag T, Hanci V, Aydin M, Dogan SM, Turan IO, Yildirim N, et al. Influence of  
4 500 menstrual cycle on p wave dispersion. *International heart journal*. 2011;52(1):23-6. PubMed  
5 501 PMID: 21321464. Epub 2011/02/16. eng.
- 6 502 25. Mueller NT, Pereira MA, Demerath EW, Dreyfus JG, MacLehose RF, Carr JJ, et al.  
7 503 Earlier menarche is associated with fatty liver and abdominal ectopic fat in midlife, independent  
8 504 of young adult BMI: The CARDIA study. *Obesity (Silver Spring, Md)*. 2015 Feb;23(2):468-74.  
9 505 PubMed PMID: 25521620. Pubmed Central PMCID: PMC4310794. Epub 2014/12/19. eng.
- 10 506 26. Janghorbani M, Mansourian M, Hosseini E. Systematic review and meta-analysis of age  
11 507 at menarche and risk of type 2 diabetes. *Acta diabetologica*. 2014 Aug;51(4):519-28. PubMed  
12 508 PMID: 24671509. Epub 2014/03/29. eng.
- 13 509 27. McManus DD, Xanthakis V, Sullivan LM, Zachariah J, Aragam J, Larson MG, et al.  
14 510 Longitudinal tracking of left atrial diameter over the adult life course: Clinical correlates in the  
15 511 community. *Circulation*. 2010 Feb 9;121(5):667-74. PubMed PMID: 20100973. Pubmed Central  
16 512 PMCID: PMC2823068. Epub 2010/01/27. eng.
- 17 513 28. Sedlak T, Shufelt C, Iribarren C, Merz CN. Sex hormones and the QT interval: a review.  
18 514 *Journal of women's health (2002)*. 2012 Sep;21(9):933-41. PubMed PMID: 22663191. Pubmed  
19 515 Central PMCID: PMC3430484. Epub 2012/06/06. eng.
- 20  
21  
22  
23  
24  
25  
26 518  
27  
28  
29  
30  
31  
32  
33  
34  
35  
36  
37  
38  
39  
40  
41  
42  
43  
44  
45  
46  
47  
48  
49  
50  
51  
52  
53  
54  
55  
56  
57  
58  
59  
60

1  
2  
3  
4  
5  
6  
7  
8  
9  
10  
11  
12  
13  
14  
15  
16  
17  
18  
19  
20  
21  
22  
23  
24  
25  
26  
27  
28  
29  
30  
31  
32  
33  
34  
35  
36  
37  
38  
39  
40  
41  
42  
43  
44  
45  
46  
47  
48  
49  
50  
51  
52  
53  
54  
55  
56  
57  
58  
59  
60

519 **Figure Legend: Creation of the Study Sample.** Clinical Trials include Hormone Trial, Dietary  
520 Modification and Calcium/Vitamin D. ECG=electrocardiogram, CVD=Cardiovascular diseases.  
521

For peer review only

522 **Table 1: Baseline Characteristics of the Study Sample- Analytic and Excluded**

| Distribution of Covariates by Number of Live Births | Never pregnant | None (prior pregnancy, no livebirths) | 1              | 2-4             | 5+             | Analytic        | Excluded       |
|-----------------------------------------------------|----------------|---------------------------------------|----------------|-----------------|----------------|-----------------|----------------|
| <b>Sample Size</b>                                  | 3296           | 1082                                  | 3536           | 26599           | 6174           | 40687           | 6685           |
| <b>Age, N (%)</b>                                   |                |                                       |                |                 |                |                 |                |
| <b>50 to 54</b>                                     | 598<br>(18.1)  | 265 (24.5)                            | 745<br>(21.1)  | 3718<br>(14)    | 329<br>(5.3)   | 5655<br>(13.9)  | 834<br>(12.5)  |
| <b>55 to 59</b>                                     | 768<br>(23.3)  | 295 (27.3)                            | 869<br>(24.6)  | 6282<br>(23.6)  | 1054<br>(17.1) | 9268<br>(22.8)  | 1204 (18)      |
| <b>60 to 69</b>                                     | 1323<br>(40.1) | 371 (34.3)                            | 1363<br>(38.5) | 12189<br>(45.8) | 3580<br>(58)   | 18826<br>(46.3) | 3146<br>(47.1) |
| <b>70 to 79</b>                                     | 607<br>(18.4)  | 151 (14)                              | 559<br>(15.8)  | 4410<br>(16.6)  | 1211<br>(19.6) | 6938<br>(17.1)  | 1501<br>(22.5) |
| <b>MISSING</b>                                      | 0 (0)          | 0 (0)                                 | 0 (0)          | 0 (0)           | 0 (0)          | 0 (0)           | 0 (0)          |
| <b>Race/Ethnicity, N (%)</b>                        |                |                                       |                |                 |                |                 |                |
| <b>American Indian/Alaskan Native</b>               | 3 (0.1)        | 3 (0.3)                               | 13<br>(0.4)    | 96 (0.4)        | 32 (0.5)       | 147<br>(0.4)    | 39 (0.6)       |
| <b>Asian/PI</b>                                     | 121 (3.7)      | 33 (3)                                | 102<br>(2.9)   | 728<br>(2.7)    | 106<br>(1.7)   | 1090<br>(2.7)   | 143 (2.1)      |
| <b>African-American</b>                             | 263 (8)        | 203 (18.8)                            | 604<br>(17.1)  | 2126<br>(8)     | 598<br>(9.7)   | 3794<br>(9.3)   | 1017<br>(15.2) |
| <b>Hispanic</b>                                     | 106 (3.2)      | 50 (4.6)                              | 160<br>(4.5)   | 1005<br>(3.8)   | 300<br>(4.9)   | 1621 (4)        | 471 (7)        |
| <b>White</b>                                        | 2767<br>(84)   | 780 (72.1)                            | 2601<br>(73.6) | 22352<br>(84)   | 5056<br>(81.9) | 33556<br>(82.5) | 4808<br>(71.9) |
| <b>Other</b>                                        | 36 (1.1)       | 13 (1.2)                              | 56<br>(1.6)    | 292<br>(1.1)    | 82 (1.3)       | 479<br>(1.2)    | 98 (1.5)       |
| <b>MISSING</b>                                      | 0 (0)          | 0 (0)                                 | 0 (0)          | 0 (0)           | 0 (0)          | 0 (0)           | 109 (1.6)      |
| <b>Education Level, N (%)</b>                       |                |                                       |                |                 |                |                 |                |
| <b>No high school diploma</b>                       | 73 (2.2)       | 41 (3.8)                              | 157<br>(4.4)   | 1033<br>(3.9)   | 543<br>(8.8)   | 1847<br>(4.5)   | 644 (9.6)      |
| <b>High school diploma</b>                          | 1352<br>(41)   | 490 (45.3)                            | 1872<br>(52.9) | 15726<br>(59.1) | 4096<br>(66.3) | 23536<br>(57.8) | 3752<br>(56.1) |
| <b>Bachelor's degree</b>                            | 802<br>(24.3)  | 250 (23.1)                            | 801<br>(22.7)  | 5859<br>(22)    | 1087<br>(17.6) | 8799<br>(21.6)  | 1171<br>(17.5) |
| <b>Graduate degree</b>                              | 1069<br>(32.4) | 301 (27.8)                            | 706<br>(20)    | 3981<br>(15)    | 448<br>(7.3)   | 6505<br>(16)    | 789<br>(11.8)  |
| <b>MISSING</b>                                      | 0 (0)          | 0 (0)                                 | 0 (0)          | 0 (0)           | 0 (0)          | 0 (0)           | 329 (4.9)      |
| <b>Household</b>                                    |                |                                       |                |                 |                |                 |                |

|                                                 |                |             |                |                 |                |                 |                |
|-------------------------------------------------|----------------|-------------|----------------|-----------------|----------------|-----------------|----------------|
| <b>Income, N (%)</b>                            |                |             |                |                 |                |                 |                |
| <b>&lt;\$50,000</b>                             | 2071<br>(62.8) | 639 (59.1)  | 2136<br>(60.4) | 15872<br>(59.7) | 4543<br>(73.6) | 25261<br>(62.1) | 2809 (42)      |
| <b>\$50 to 100,000</b>                          | 974<br>(29.6)  | 333 (30.8)  | 1090<br>(30.8) | 8260<br>(31.1)  | 1330<br>(21.5) | 11987<br>(29.5) | 874<br>(13.1)  |
| <b>&gt;\$100,000</b>                            | 251 (7.6)      | 110 (10.2)  | 310<br>(8.8)   | 2467<br>(9.3)   | 301<br>(4.9)   | 3439<br>(8.5)   | 208 (3.1)      |
| <b>MISSING</b>                                  | 0 (0)          | 0 (0)       | 0 (0)          | 0 (0)           | 0 (0)          | 0 (0)           | 2794<br>(41.8) |
| <b>Region, N (%)</b>                            |                |             |                |                 |                |                 |                |
| <b>Northeast</b>                                | 763<br>(23.1)  | 202 (18.7)  | 694<br>(19.6)  | 5830<br>(21.9)  | 1554<br>(25.2) | 9043<br>(22.2)  | 1484<br>(22.2) |
| <b>Midwest</b>                                  | 719<br>(21.8)  | 192 (17.7)  | 709<br>(20.1)  | 5793<br>(21.8)  | 1792<br>(29)   | 9205<br>(22.6)  | 1422<br>(21.3) |
| <b>South</b>                                    | 778<br>(23.6)  | 321 (29.7)  | 1012<br>(28.6) | 6559<br>(24.7)  | 1205<br>(19.5) | 9875<br>(24.3)  | 2081<br>(31.1) |
| <b>West</b>                                     | 1036<br>(31.4) | 367 (33.9)  | 1121<br>(31.7) | 8417<br>(31.6)  | 1623<br>(26.3) | 12564<br>(30.9) | 1698<br>(25.4) |
| <b>MISSING</b>                                  | 0 (0)          | 0 (0)       | 0 (0)          | 0 (0)           | 0 (0)          | 0 (0)           | 0 (0)          |
| <b>BMI, N (%)</b>                               |                |             |                |                 |                |                 |                |
| <b>Underweight<br/>(<math>&lt; 18.5</math>)</b> | 34 (1)         | 8 (0.7)     | 26<br>(0.7)    | 103<br>(0.4)    | 15 (0.2)       | 186<br>(0.5)    | 25 (0.4)       |
| <b>Normal (18.5 -<br/>24.9)</b>                 | 1001<br>(30.4) | 309 (28.6)  | 1041<br>(29.4) | 7557<br>(28.4)  | 1341<br>(21.7) | 11249<br>(27.6) | 1582<br>(23.7) |
| <b>Overweight<br/>(25.0 - 29.9)</b>             | 1118<br>(33.9) | 377 (34.8)  | 1234<br>(34.9) | 9660<br>(36.3)  | 2262<br>(36.6) | 14651<br>(36)   | 2262<br>(33.8) |
| <b>Obese (30+)</b>                              | 1143<br>(34.7) | 388 (35.9)  | 1235<br>(34.9) | 9279<br>(34.9)  | 2556<br>(41.4) | 14601<br>(35.9) | 2579<br>(38.6) |
| <b>MISSING</b>                                  | 0 (0)          | 0 (0)       | 0 (0)          | 0 (0)           | 0 (0)          | 0 (0)           | 237 (3.5)      |
| <b>Hypertension,<br/>N (%)</b>                  |                |             |                |                 |                |                 |                |
| <b>Never<br/>hypertensive</b>                   | 2308<br>(70)   | 742 (68.6)  | 2439<br>(69)   | 18413<br>(69.2) | 4045<br>(65.5) | 27947<br>(68.7) | 4236<br>(63.4) |
| <b>Treated<br/>hypertensive</b>                 | 712<br>(21.6)  | 240 (22.2)  | 819<br>(23.2)  | 6141<br>(23.1)  | 1638<br>(26.5) | 9550<br>(23.5)  | 1684<br>(25.2) |
| <b>Untreated<br/>hypertensive</b>               | 276 (8.4)      | 100 (9.2)   | 278<br>(7.9)   | 2045<br>(7.7)   | 491 (8)        | 3190<br>(7.8)   | 516 (7.7)      |
| <b>MISSING</b>                                  | 0 (0)          | 0 (0)       | 0 (0)          | 0 (0)           | 0 (0)          | 0 (0)           | 249 (3.7)      |
| <b>History of<br/>Diabetes, N<br/>(%)</b>       |                |             |                |                 |                |                 |                |
| <b>Yes</b>                                      | 150 (4.6)      | 57 (5.3)    | 179<br>(5.1)   | 1377<br>(5.2)   | 434 (7)        | 2197<br>(5.4)   | 459 (6.9)      |
| <b>No</b>                                       | 3146<br>(95.4) | 1025 (94.7) | 3357<br>(94.9) | 25222<br>(94.8) | 5740<br>(93)   | 38490<br>(94.6) | 6217 (93)      |



|                                            |                |               |               |               |                |                |                |
|--------------------------------------------|----------------|---------------|---------------|---------------|----------------|----------------|----------------|
| <b>MISSING</b>                             | 0 (0)          | 0 (0)         | 0 (0)         | 0 (0)         | 0 (0)          | 0 (0)          | 9 (0.1)        |
| <b>History of Breastfeeding, N (%)</b>     |                |               |               |               |                |                |                |
| <b>Yes</b>                                 | 6 (0.2)        | 36 (3.3)      | 1476 (41.7)   | 15375 (57.8)  | 4258 (69)      | 21151 (52)     | 3309 (49.5)    |
| <b>No</b>                                  | 3290 (99.8)    | 1046 (96.7)   | 2060 (58.3)   | 11224 (42.2)  | 1916 (31)      | 19536 (48)     | 2942 (44)      |
| <b>MISSING</b>                             | 0 (0)          | 0 (0)         | 0 (0)         | 0 (0)         | 0 (0)          | 0 (0)          | 434 (6.5)      |
| <b>History of Oophorectomy, N (%)</b>      |                |               |               |               |                |                |                |
| <b>No</b>                                  | 2253 (68.4)    | 711 (65.7)    | 2462 (69.6)   | 19371 (72.8)  | 4704 (76.2)    | 29501 (72.5)   | 4404 (65.9)    |
| <b>Yes, part of an ovary was taken out</b> | 32 (1)         | 20 (1.8)      | 42 (1.2)      | 225 (0.8)     | 41 (0.7)       | 360 (0.9)      | 85 (1.3)       |
| <b>Yes, one was taken out</b>              | 203 (6.2)      | 127 (11.7)    | 285 (8.1)     | 1718 (6.5)    | 356 (5.8)      | 2689 (6.6)     | 645 (9.6)      |
| <b>Yes, both were taken out</b>            | 782 (23.7)     | 207 (19.1)    | 716 (20.2)    | 5082 (19.1)   | 1019 (16.5)    | 7806 (19.2)    | 759 (11.4)     |
| <b>Yes, unknown number taken out</b>       | 26 (0.8)       | 17 (1.6)      | 31 (0.9)      | 203 (0.8)     | 54 (0.9)       | 331 (0.8)      | 159 (2.4)      |
| <b>MISSING</b>                             | 0 (0)          | 0 (0)         | 0 (0)         | 0 (0)         | 0 (0)          | 0 (0)          | 633 (9.5)      |
| <b>History of HT, N (%)</b>                |                |               |               |               |                |                |                |
| <b>Never used</b>                          | 1520 (46.1)    | 478 (44.2)    | 1601 (45.3)   | 11660 (43.8)  | 3324 (53.8)    | 18583 (45.7)   | 4372 (65.4)    |
| <b>Past user</b>                           | 561 (17)       | 191 (17.7)    | 575 (16.3)    | 4780 (18)     | 1147 (18.6)    | 7254 (17.8)    | 821 (12.3)     |
| <b>Current user</b>                        | 1215 (36.9)    | 413 (38.2)    | 1360 (38.5)   | 10159 (38.2)  | 1703 (27.6)    | 14850 (36.5)   | 1450 (21.7)    |
| <b>MISSING</b>                             | 0 (0)          | 0 (0)         | 0 (0)         | 0 (0)         | 0 (0)          | 0 (0)          | 42 (0.6)       |
| <b>Age (y), Mean (SD)</b>                  | 61.95 (7.43)   | 60.4 (7.36)   | 61.14 (7.32)  | 62.23 (6.87)  | 64.14 (5.97)   | 62.36 (6.9)    | 63.46 (7.16)   |
| <b>Missing (%)</b>                         | 0              | 0             | 0             | 0             | 0              | 0              | 0              |
| <b>BMI, Median (IQR)</b>                   | 27.39 (7.72)   | 27.74 (8.02)  | 27.69 (7.56)  | 27.73 (7.34)  | 28.78 (7.45)   | 27.85 (7.46)   | 28.39 (7.86)   |
| <b>Missing (%)</b>                         | 0              | 0             | 0             | 0             | 0              | 0              | 3.55           |
| <b>QTc wave duration (ms), Mean (SD)</b>   | 417.95 (18.38) | 418.49 (19.6) | 418.24 (19.2) | 418.58 (18.7) | 420.34 (19.33) | 418.76 (18.85) | 419.82 (19.84) |
| <b>Missing (%)</b>                         | 0              | 0             | 0             | 0             | 0              | 0              | 0              |
| <b>PR wave</b>                             | 63.86          | 64.43         | 64.51         | 64.79         | 65.77          | 64.83          | 64.87          |

|                                                          |                |                |                |                |                |                |                |
|----------------------------------------------------------|----------------|----------------|----------------|----------------|----------------|----------------|----------------|
| <b>dispersion (ms), Mean (SD)</b>                        | (19.42)        | (19.43)        | (19.43)        | (19.57)        | (19.57)        | (19.55)        | (20.56)        |
| <b>Missing (%)</b>                                       | 0              | 0              | 0              | 0              | 0              | 0              | 0              |
| <b>PR interval duration (ms), Median (IQR)</b>           | 156 (30)       | 158 (28)       | 158 (30)       | 158 (30)       | 160 (30)       | 158 (30)       | 158 (30)       |
| <b>Missing (%)</b>                                       | 0              | 0              | 0              | 0              | 0              | 0              | 0              |
| <b>P wave duration (ms), Mean (SD)</b>                   | 106.81 (12.85) | 107.13 (12.33) | 106.96 (12.18) | 106.88 (12.34) | 107.93 (12.44) | 107.05 (12.39) | 106.61 (16.09) |
| <b>Missing (%)</b>                                       | 0              | 0              | 0              | 0              | 0              | 0              | 0              |
| <b>Age at menopause (y), Median (IQR)</b>                | 48 (8)         | 49 (7)         | 49 (8)         | 50 (7)         | 50 (8)         | 50 (7)         | 49 (7)         |
| <b>Missing (%)</b>                                       | 0              | 0              | 0              | 0              | 0              | 0              | 32.3           |
| <b>Age at menarche (y), Mean (SD)</b>                    | 12.54 (1.48)   | 12.55 (1.57)   | 12.58 (1.54)   | 12.58 (1.47)   | 12.67 (1.46)   | 12.59 (1.48)   | 12.65 (1.53)   |
| <b>Missing (%)</b>                                       | 0              | 0              | 0              | 0              | 0              | 0              | 1.78           |
| <b>Duration of reproductive period (y), Median (IQR)</b> | 36 (8)         | 36 (8)         | 36 (8)         | 37 (8)         | 37 (7)         | 37 (8)         | 36 (8)         |
| <b>Missing (%)</b>                                       | 0              | 0              | 0              | 0              | 0              | 0              | 33.63          |

523

524 HT=Hormone Therapy (or hormone replacement therapy)

525



526 **Table 1: Unadjusted and multivariable-adjusted association of number of pregnancies**  
 527 **leading to livebirths and reproductive period duration with PR interval (ms) in N=40,687**  
 528 **women in the Womens Health Initiative Clinical Trials**

|                                                                                                                                                                                                                                                 | <b>Unadjusted<br/>Effect<br/>(95% CI)</b> | <b>Multivariable<br/>Adjusted<br/>Effect*<br/>(95% CI)</b> |                                 |
|-------------------------------------------------------------------------------------------------------------------------------------------------------------------------------------------------------------------------------------------------|-------------------------------------------|------------------------------------------------------------|---------------------------------|
| <b>Number of live births and reproductive period duration are each in their own separate multivariable models.</b>                                                                                                                              |                                           |                                                            |                                 |
| Number of Live Births<br>( <i>categorical with never pregnant as referent category</i> )                                                                                                                                                        |                                           |                                                            | p value for linear trend= 0.11  |
| Never Pregnant                                                                                                                                                                                                                                  | Ref.                                      | Ref.                                                       |                                 |
| None (prior pregnancy, no livebirths)                                                                                                                                                                                                           | 1.44<br>(-0.18,3.06)                      | 1.15<br>(-0.43, 2.74)                                      |                                 |
| 1                                                                                                                                                                                                                                               | 1.16<br>(0.04,2.28)                       | 0.54<br>(-0.57, 1.66)                                      |                                 |
| 2-4                                                                                                                                                                                                                                             | 1.20<br>(0.34,2.05)                       | 0.59<br>(-0.301, 1.48)                                     |                                 |
| 5+                                                                                                                                                                                                                                              | 3.06<br>(2.07,4.06)                       | 1.32<br>(0.25, 2.39)                                       |                                 |
| <b>Due to the fact that there was statistically significant effect modification by HT use upon the association between reproductive period and PR interval in linear regression models, we present the model estimates by strata of HT use.</b> |                                           |                                                            |                                 |
| Reproductive period duration ( <i>continuous, years</i> )                                                                                                                                                                                       |                                           |                                                            | p value for interaction = 0.009 |
| Never HT User                                                                                                                                                                                                                                   | 0.05<br>(-0.01, 0.11)                     | 0.10<br>(0.04, 0.16)                                       |                                 |
| Past HT use                                                                                                                                                                                                                                     | 0.002<br>(-0.07, 0.08)                    | 0.08<br>(-0.00,0.15)                                       |                                 |
| Current HT use                                                                                                                                                                                                                                  | -0.09<br>(-0.15, -0.03)                   | -0.02<br>(-0.08, 0.04)                                     |                                 |

529 \*Covariates include age, baseline BMI, baseline hypertension status, history of diabetes, income,  
 530 education, race/ethnicity, region, history/ duration of breastfeeding, lipid medication,  
 531 oophorectomy status, hysterectomy status, hormone use history, heart rate and QRS duration  
 532 HT=hormone therapy  
 533

534

535

536

537

**Table 3: Unadjusted and multivariable-adjusted association of number of pregnancies leading to livebirths and reproductive period duration with QTc interval (ms) in N=40,687 women in the Womens Health Initiative and Clinical Trials**

|                                                                                                                                                  | <b>Unadjusted Effect (95% CI)</b> | <b>Multivariable Adjusted Effect* (95% CI)</b> | <b>P value</b>                 |
|--------------------------------------------------------------------------------------------------------------------------------------------------|-----------------------------------|------------------------------------------------|--------------------------------|
| <b>Number of live births and reproductive period duration are each in their own multivariable models</b>                                         |                                   |                                                |                                |
| Number of Live Births<br>( <i>categorical with never pregnant as referent category</i> )<br>Never Pregnant None (prior pregnancy, no livebirths) | Ref.<br>0.54<br>(-0.76,1.83)      | Ref.<br>0.66<br>(-0.56, 1.88)                  | p value for linear trend=0.008 |
| 1                                                                                                                                                | 0.29<br>(-0.60,1.18)              | 0.15<br>(-0.71, 1.02)                          |                                |
| 2-4                                                                                                                                              | 0.63<br>(-0.05,1.31)              | 0.25<br>(-0.43, 0.94)                          |                                |
| 5+                                                                                                                                               | 2.39<br>(1.59,3.19)               | 1.15<br>(0.33, 1.98)                           |                                |
| Reproductive period duration<br>( <i>continuous, years</i> )                                                                                     | -0.09<br>(-0.12,-0.06)            | -0.04<br>(-0.07, -0.01)                        |                                |

541 \*Covariates for number of livebirths analysis include age, baseline BMI, baseline hypertension  
 542 status, history of diabetes, income, education, race/ethnicity, region, history/ duration of  
 543 breastfeeding, lipid medication, oophorectomy status, hysterectomy status, hormone use history,  
 544 heart rate and QRS duration. Covariates for reproductive period duration analysis include live  
 545 births, age, baseline BMI, baseline hypertension status, history of diabetes, income, education,  
 546 race/ethnicity, region, history of breastfeeding, duration of breastfeeding, lipid medication,  
 547 oophorectomy status, hysterectomy status, hormone use history, and QRS duration.  
 548 HT=hormone therapy  
 549

**Table 4: Unadjusted and multivariable-adjusted associations between number of pregnancies leading to livebirths with p wave duration and p wave dispersion in N=39,338\* women in the Women's Health Initiative and Clinical Trials**

| Dependent Variable            | Number of Live Births                                | Unadjusted Effect (95% CI)    | Adjusted Effect (95% CI)      | p-value                        |
|-------------------------------|------------------------------------------------------|-------------------------------|-------------------------------|--------------------------------|
| <b>P wave duration (ms)</b>   | Never Pregnant None (prior pregnancy, no livebirths) | Ref.<br>0.09<br>(-0.73, 0.92) | Ref.<br>0.09<br>(-0.69, 0.87) | p value for linear trend =0.73 |
|                               | 1                                                    | -0.06<br>(-0.63, 0.51)        | -0.20<br>(-0.76, 0.35)        |                                |
|                               | 2-4                                                  | -0.03<br>(-0.47, 0.40)        | -0.26<br>(-0.70, 0.18)        |                                |
|                               | 5+                                                   | 0.99<br>(0.49, 1.50)          | -0.22<br>(-0.74, 0.31)        |                                |
|                               |                                                      |                               |                               |                                |
| <b>P wave dispersion (ms)</b> | Never Pregnant None (prior pregnancy, no livebirths) | Ref.<br>0.67<br>(-0.42, 1.77) | Ref.<br>0.64<br>(-0.45, 1.72) | p for linear trend =0.13       |
|                               | 1                                                    | 0.44<br>(-0.32, 1.20)         | 0.34<br>(-0.42, 1.11)         |                                |
|                               | 2-4                                                  | 0.72<br>(0.15, 1.30)          | 0.62<br>(0.01, 1.24)          |                                |
|                               | 5+                                                   | 1.49<br>(0.82, 2.17)          | 0.94<br>(0.20, 1.67)          |                                |
|                               |                                                      |                               |                               |                                |

Effect estimates correspond to expected ms increase in the specified interval measure for each parity group relative to the never pregnant group. Fully adjusted models were adjusted for age, baseline BMI, baseline hypertension status, history of diabetes, income, education, race/ethnicity, region, history of breastfeeding, antianxiety medication, antidepressant medication, lipid medication, duration of breastfeeding, oophorectomy status, hysterectomy status, hormone use history, heart rate, and QRS duration.

\*n differs from main analyses due to the exclusion of women with implausible PR wave measures

564 **Table 5: Reproductive Duration and P wave Duration and Dispersion by hormone use**  
 565 **status. in N= 31,538\* Women in the Women's Health Initiative Clinical Trial.**

| Dependent Variable                                                                                                                                                                                                                                         | Hormone Use Status | Unadjusted Effect (95% CI) | Adjusted Effect (95% CI) | P value                            |
|------------------------------------------------------------------------------------------------------------------------------------------------------------------------------------------------------------------------------------------------------------|--------------------|----------------------------|--------------------------|------------------------------------|
| <b>Due to the fact that there was statistically significant effect modification by HT use upon the association between reproductive period and P wave duration in linear regression models, we present the model estimates <i>by strata</i> of HT use.</b> |                    |                            |                          |                                    |
| P wave duration (ms)                                                                                                                                                                                                                                       | Never User         | 0.07<br>(0.03, 0.11)       | 0.09<br>(0.06, 0.13)     | p value for interaction=<br>0.0009 |
|                                                                                                                                                                                                                                                            | Past               | -0.04<br>(-0.08, 0.005)    | 0.01<br>(-0.03, 0.05)    |                                    |
|                                                                                                                                                                                                                                                            | Current            | -0.03<br>(-0.06, 0.004)    | 0.01<br>(-0.02, 0.05)    |                                    |
| P wave dispersion (ms)                                                                                                                                                                                                                                     | Never User         | 0.002<br>(-0.04, 0.05)     | 0.01<br>(-0.03, 0.06)    | p value for interaction=<br>0.65   |
|                                                                                                                                                                                                                                                            | Past               | -0.03<br>(-0.09, 0.02)     | -0.01<br>(-0.06, 0.05)   |                                    |
|                                                                                                                                                                                                                                                            | Current            | -0.04<br>(-0.08, 0.003)    | -0.02<br>(-0.06, 0.03)   |                                    |

566 Effect estimates correspond to expected ms increase in PR measure. These models contained an  
 567 interaction term for reproductive period duration hormone use status. Fully adjusted models were  
 568 adjusted for number of live births, age, baseline BMI, baseline hypertension status, history of  
 569 diabetes, income, education, race/ethnicity, region, history of breastfeeding, duration of  
 570 breastfeeding, antianxiety medication, antidepressant medication, lipid medication,  
 571 oophorectomy status, hysterectomy status, hormone use history, heart rate, and QRS duration.

572 \*n differs from main analyses due to the exclusion of women with implausible PR wave  
 573 measures

574

1  
2  
3  
4  
5  
6  
7  
8  
9  
10  
11  
12  
13  
14  
15  
16  
17  
18  
19  
20  
21  
22  
23  
24  
25  
26  
27  
28  
29  
30  
31  
32  
33  
34  
35  
36  
37  
38  
39  
40  
41  
42  
43  
44  
45  
46  
47  
48  
49  
50  
51  
52  
53  
54  
55  
56  
57  
58  
59  
60

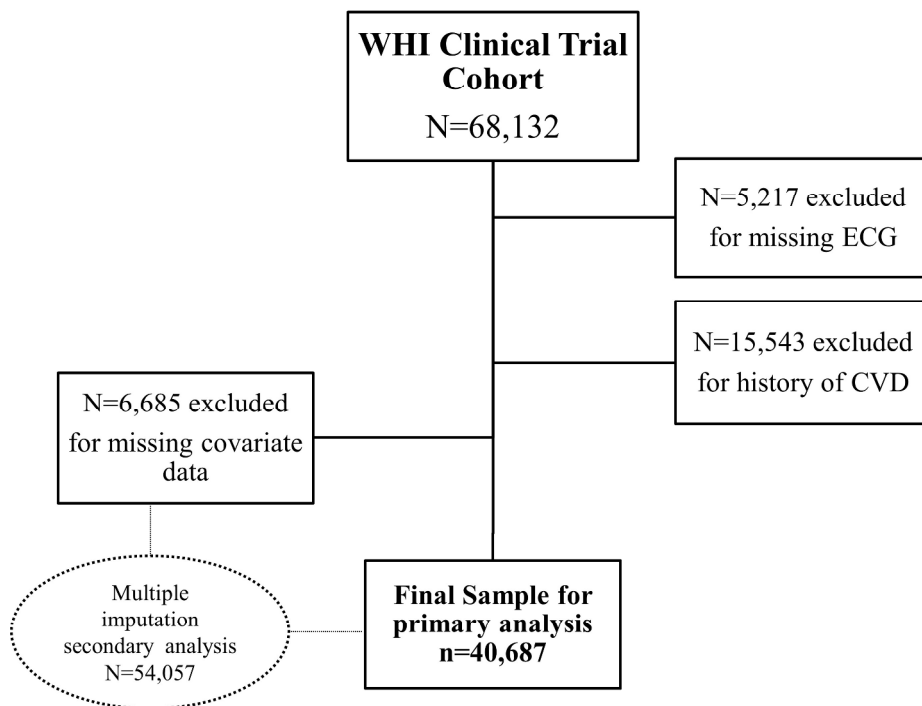

254x190mm (300 x 300 DPI)

Pre-view only

STROBE Statement—checklist of items that should be included in reports of observational studies with page number in manuscript.

|                              | Item No | Recommendation                                                                                                                                                                                                                                                                                                                                                                                                                                                         | Page number |
|------------------------------|---------|------------------------------------------------------------------------------------------------------------------------------------------------------------------------------------------------------------------------------------------------------------------------------------------------------------------------------------------------------------------------------------------------------------------------------------------------------------------------|-------------|
| <b>Title and abstract</b>    | 1       | (a) Indicate the study's design with a commonly used term in the title or the abstract                                                                                                                                                                                                                                                                                                                                                                                 | 1           |
|                              |         | (b) Provide in the abstract an informative and balanced summary of what was done and what was found                                                                                                                                                                                                                                                                                                                                                                    | 2           |
| <b>Introduction</b>          |         |                                                                                                                                                                                                                                                                                                                                                                                                                                                                        |             |
| Background/rationale         | 2       | Explain the scientific background and rationale for the investigation being reported                                                                                                                                                                                                                                                                                                                                                                                   | 3-5         |
| Objectives                   | 3       | State specific objectives, including any prespecified hypotheses                                                                                                                                                                                                                                                                                                                                                                                                       | 5           |
| <b>Methods</b>               |         |                                                                                                                                                                                                                                                                                                                                                                                                                                                                        |             |
| Study design                 | 4       | Present key elements of study design early in the paper                                                                                                                                                                                                                                                                                                                                                                                                                | 1, 5-10     |
| Setting                      | 5       | Describe the setting, locations, and relevant dates, including periods of recruitment, exposure, follow-up, and data collection                                                                                                                                                                                                                                                                                                                                        | 5-6         |
| Participants                 | 6       | (a) <i>Cohort study</i> —Give the eligibility criteria, and the sources and methods of selection of participants. Describe methods of follow-up<br><i>Case-control study</i> —Give the eligibility criteria, and the sources and methods of case ascertainment and control selection. Give the rationale for the choice of cases and controls<br><i>Cross-sectional study</i> —Give the eligibility criteria, and the sources and methods of selection of participants | 5-6         |
|                              |         | (b) <i>Cohort study</i> —For matched studies, give matching criteria and number of exposed and unexposed<br><i>Case-control study</i> —For matched studies, give matching criteria and the number of controls per case                                                                                                                                                                                                                                                 | N/A         |
| Variables                    | 7       | Clearly define all outcomes, exposures, predictors, potential confounders, and effect modifiers. Give diagnostic criteria, if applicable                                                                                                                                                                                                                                                                                                                               | 6-7         |
| Data sources/<br>measurement | 8*      | For each variable of interest, give sources of data and details of methods of assessment (measurement). Describe comparability of assessment methods if there is more than one group                                                                                                                                                                                                                                                                                   | 6-7         |
| Bias                         | 9       | Describe any efforts to address potential sources of bias                                                                                                                                                                                                                                                                                                                                                                                                              | 8-9         |
| Study size                   | 10      | Explain how the study size was arrived at                                                                                                                                                                                                                                                                                                                                                                                                                              | 6-7         |
| Quantitative variables       | 11      | Explain how quantitative variables were handled in the analyses. If applicable, describe which groupings were chosen and why                                                                                                                                                                                                                                                                                                                                           | 8-9         |
| Statistical methods          | 12      | (a) Describe all statistical methods, including those used to control for confounding                                                                                                                                                                                                                                                                                                                                                                                  | 8-9         |
|                              |         | (b) Describe any methods used to examine subgroups and interactions                                                                                                                                                                                                                                                                                                                                                                                                    | 8-9         |
|                              |         | (c) Explain how missing data were addressed                                                                                                                                                                                                                                                                                                                                                                                                                            | 9-10        |
|                              |         | (d) <i>Cohort study</i> —If applicable, explain how loss to follow-up was addressed<br><i>Case-control study</i> —If applicable, explain how matching of cases and controls was addressed<br><i>Cross-sectional study</i> —If applicable, describe analytical methods taking account of sampling strategy                                                                                                                                                              | 5-7         |
|                              |         | (e) Describe any sensitivity analyses                                                                                                                                                                                                                                                                                                                                                                                                                                  | 9-10        |

Continued on next page

| <b>Results</b>           |     | <b>Page number</b>                                                                                                                                                                                           |            |
|--------------------------|-----|--------------------------------------------------------------------------------------------------------------------------------------------------------------------------------------------------------------|------------|
| Participants             | 13* | (a) Report numbers of individuals at each stage of study—eg numbers potentially eligible, examined for eligibility, confirmed eligible, included in the study, completing follow-up, and analysed            | 5-6        |
|                          |     | (b) Give reasons for non-participation at each stage                                                                                                                                                         | 5-6        |
|                          |     | (c) Consider use of a flow diagram                                                                                                                                                                           | 5-6, 19    |
| Descriptive data         | 14* | (a) Give characteristics of study participants (eg demographic, clinical, social) and information on exposures and potential confounders                                                                     | 5-6, 20-23 |
|                          |     | (b) Indicate number of participants with missing data for each variable of interest                                                                                                                          | 19, 20-23  |
|                          |     | (c) <i>Cohort study</i> —Summarise follow-up time (eg, average and total amount)                                                                                                                             | N/A        |
| Outcome data             | 15* | <i>Cohort study</i> —Report numbers of outcome events or summary measures over time                                                                                                                          | N/A        |
|                          |     | <i>Case-control study</i> —Report numbers in each exposure category, or summary measures of exposure                                                                                                         | N/A        |
|                          |     | <i>Cross-sectional study</i> —Report numbers of outcome events or summary measures                                                                                                                           | 5-7        |
| Main results             | 16  | (a) Give unadjusted estimates and, if applicable, confounder-adjusted estimates and their precision (eg, 95% confidence interval). Make clear which confounders were adjusted for and why they were included | 24-27      |
|                          |     | (b) Report category boundaries when continuous variables were categorized                                                                                                                                    | 20-23      |
|                          |     | (c) If relevant, consider translating estimates of relative risk into absolute risk for a meaningful time period                                                                                             | 10-11      |
| Other analyses           | 17  | Report other analyses done—eg analyses of subgroups and interactions, and sensitivity analyses                                                                                                               | 10-11      |
| <b>Discussion</b>        |     |                                                                                                                                                                                                              |            |
| Key results              | 18  | Summarise key results with reference to study objectives                                                                                                                                                     | 11-12      |
| Limitations              | 19  | Discuss limitations of the study, taking into account sources of potential bias or imprecision. Discuss both direction and magnitude of any potential bias                                                   | 14-15      |
| Interpretation           | 20  | Give a cautious overall interpretation of results considering objectives, limitations, multiplicity of analyses, results from similar studies, and other relevant evidence                                   | 15         |
| Generalisability         | 21  | Discuss the generalisability (external validity) of the study results                                                                                                                                        | 15         |
| <b>Other information</b> |     |                                                                                                                                                                                                              |            |
| Funding                  | 22  | Give the source of funding and the role of the funders for the present study and, if applicable, for the original study on which the present article is based                                                | 1          |

\*Give information separately for cases and controls in case-control studies and, if applicable, for exposed and unexposed groups in cohort and cross-sectional studies.

**Note:** An Explanation and Elaboration article discusses each checklist item and gives methodological background and published examples of transparent reporting. The STROBE checklist is best used in conjunction with this article (freely available on the Web sites of PLoS Medicine at <http://www.plosmedicine.org/>, Annals of Internal Medicine at <http://www.annals.org/>, and Epidemiology at <http://www.epidem.com/>). Information on the STROBE Initiative is available at [www.strobe-statement.org](http://www.strobe-statement.org).
